# Supplementary material for: Deep learning accelerated high-throughput screening of organic solar cells
Source: Royal Society of Chemistry journal article supplement (doi:10.1039/d5tc00111k), 2025-01-01
Supplement: d5tc00111k1.pdf [file d5tc00111k1.pdf]

### Supplementary Information

#### Deep Learning Accelerated High-throughput Screening of Organic Solar Cells

Wenlin Zhang<sup>§1</sup>, Yurong Zou<sup>§1</sup>, Xin Wang<sup>1</sup>, Junxian Chen<sup>2</sup> and Dingguo Xu<sup>\*1</sup>

<sup>1</sup>MOE Key Laboratory of Green Chemistry and Technology, College of Chemistry, Sichuan University, Chengdu, Sichuan, 610064, PR China

<sup>2</sup>College of Chemistry and Environment Protection Engineering, SouthWest University for Nationalities, Chengdu, Sichuan, 610061, PR China

§ These authors contributed equally to this work and should be considered co-first authors.

\* To whom correspondence should be addressed: dgxu@scu.edu.cn (D.X), Tel: 86-28-85406156.

## Contents

|                                                                                                                  |     |
|------------------------------------------------------------------------------------------------------------------|-----|
| Corresponding forward propagation formula of the deep learning models .....                                      | S3  |
| Figure S1. General architectures of graph neural network frameworks. ....                                        | S5  |
| Figure S2. Performance Comparison of DL Models without and with interaction effects. ....                        | S6  |
| Figure S3. Performance Comparison of DL Models while training and testing. ....                                  | S7  |
| Figure S4. The violin plots of predicted ranges in the virtual dataset .....                                     | S8  |
| Table S1. The setting of hyperparameters of DL models. ....                                                      | S9  |
| Table S2. The training predication performance of DL models .....                                                | S10 |
| Table S3. The setting of hyperparameters of DL models with interaction. ....                                     | S11 |
| Table S4. Comparison of time consumption for calculating descriptors.....                                        | S12 |
| Table S5. The comparison between device performances and their corresponding predicted PCEs in other studies.... | S13 |
| Table S6. Manually collected datasets from the literature.....                                                   | S14 |
| Table S7. Top 2000 D/A combinations from virtual screening .....                                                 | S39 |
| Reference. ....                                                                                                  | S85 |

Corresponding forward propagation formula of the deep learning models.

The Graph Convolutional Layer (GCN)<sup>1</sup> can be interpreted as a type of "convolution operation" over graph structures. The formula for graph convolution is given as:

$$h_i^{(l+1)} = \sigma \left( b^{(l)} + \sum_{j \in N(i)} \frac{1}{c_{ji}} h_j^{(l)} W^l \right) \#S1$$

where  $N(i)$  represents the set of neighbors of node  $i$ ,  $c_{ji}$  is the normalization factor calculated as the square root product of the node degrees,  $\sigma$  refers to the activation function of the convolutional layer,  $h_j^{(l)}$  represents the  $l$ -th hidden layer feature of neighboring nodes, and  $W^{(l)}$  is the learnable weight matrix. For graphs with edge features, the graph convolution incorporates the edge weight  $e_{ij}$ , as described by the following formula:

$$h_i^{(l+1)} = \sigma \left( b^{(l)} + \sum_{j \in N(i)} \frac{e_{ji}}{c_{ji}} h_j^{(l)} W^l \right) \#S2$$

In Graph Attention Networks (GAT)<sup>2</sup>, the core of the graph convolution lies in its attention mechanism, which calculates the similarity between each node and its neighbors to assign different attention weights. These weights are then combined with the node's eigenvectors to derive an updated representation of the node. The update rules for the graph attention layer can be expressed as:

$$h_i^{(l+1)} = \sum_{j \in N(i)} \alpha_{i,j} W^{(l)} h_j^{(l)} \#S3$$

where  $\alpha_{i,j}$  represents the attention score between node  $i$  and node  $j$ , and  $W^{(l)}$  is the learnable weight matrix. Similarly, in order to incorporate edge features into the node features of the graph attention mechanism, Kamiński et al.<sup>3</sup> define edge feature aggregation as follows:

$$e_{ij} = \tilde{F}(f'_{ij}) \#S4$$

$$f'_{ij} = \text{LeakyReLU}(A[h_i \| f_{ij} \| h_j]) \#S5$$

Here,  $f'_{ij}$  refers to the edge feature,  $A$  is the weight matrix,  $\vec{F}$  represents the weight vector, and  $\parallel$  denotes concatenation. After aggregating the edge features, the node features are generated and updated using the conventional GAT method.

The Graph Isomorphism Network (GIN)<sup>4</sup> aggregates the representations of neighboring nodes through summation. The convolution operator formula<sup>4</sup> for GIN is as follows:

$$h_i^{(l+1)} = f_{\theta}((1 + \epsilon)h_i^l + \text{aggregate}(\{h_j^l, j \in N(i)\})) \quad \#S6$$

where  $\text{aggregate}(\cdot)$  represents the aggregation operation, which can be selected from options such as "sum," "max," or "mean." The  $\epsilon$  value is a constant that can be added. Graph isomorphic networks that incorporate edge features<sup>5</sup> can be described by the following equation:

$$h_i^{(l+1)} = f_{\theta}\left((1 + \epsilon)h_i^l + \sum_{j \in N(i)} \text{ReLU}(h_j^l + e_{j,i}^l)\right) \quad \#S7$$

In Message Passing Neural Networks (MPNN)<sup>6</sup>, a neural network encodes the characteristic information of the node itself and its neighbors. The formula is as follows:

$$h_i^{(l+1)} = h_i^l + \text{aggregate}(\{f_{\theta}(e_{ij}) \cdot h_j^l, j \in N(i)\}) \quad \#S8$$

The interaction layer to simulate donor-acceptor interactions<sup>7</sup> as follows:

$$I_r = \tanh(F_{don}F_{acc}D_r)W_r \quad \#S9$$

Where  $r$  represents the  $r$ -th space bucket.  $D_r$  is the distance,  $W_r$  is the weight information output of the distance self-feedback module, and  $F_{don}$  and  $F_{acc}$  are the embedding features of the donor and the acceptor, respectively.

In general, the choice of convolution operator can significantly affect performance on different tasks due to the varying aggregation methods used for neighboring nodes. Therefore, it is essential to analyze the task at hand and determine which aggregation method best aligns with the specific characteristics of the task or objective.

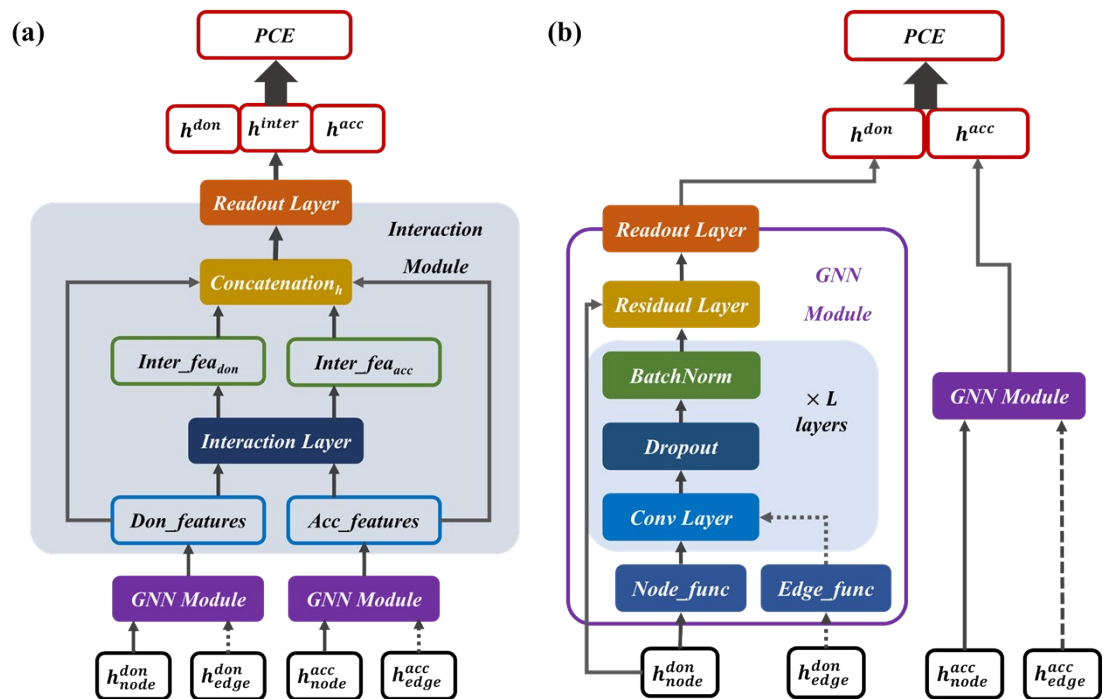

Figure S1. General architectures of graph neural network frameworks for PCE prediction: (a) with interaction module and (b) without interaction module.

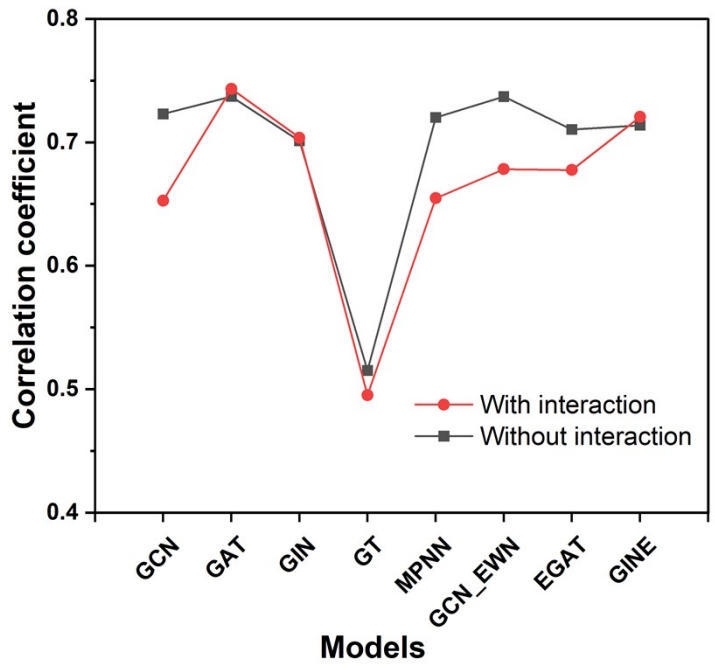

Figure S2. Performance Comparison of DL Models with and without interaction effects.

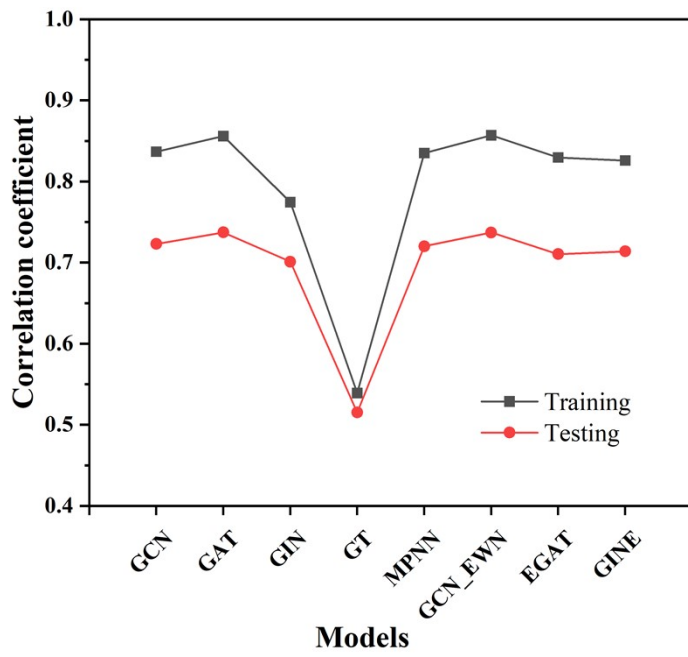

Figure S3. Performance Comparison of DL Models while training and testing.

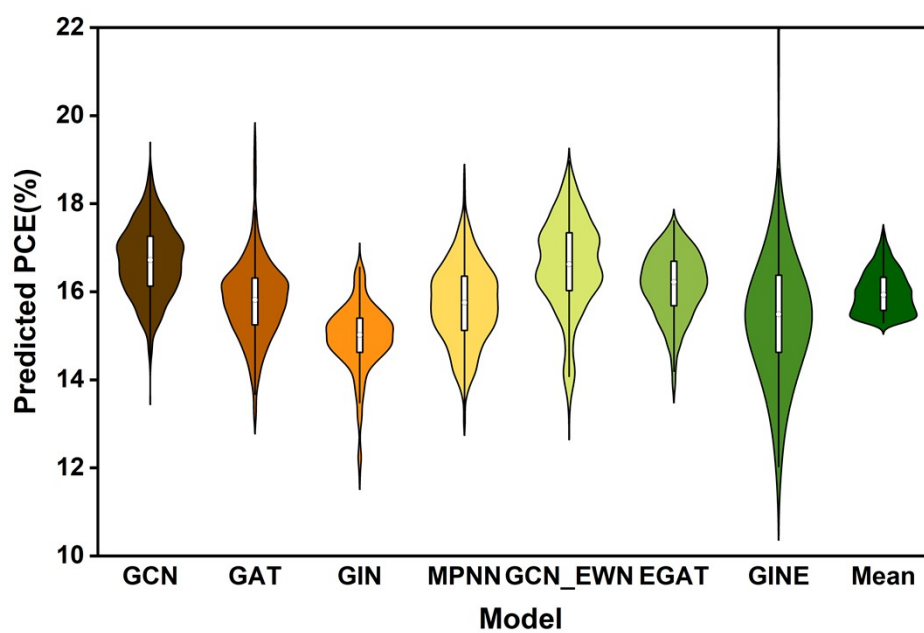

Figure S4. The violin plots of predicted ranges by different DL Models in the virtual dataset.



Table S1. The setting of hyperparameters of DL models.

| Models      | batch_size    | n_hidden     | n_layers | Dropout_rate | Activation Function |
|-------------|---------------|--------------|----------|--------------|---------------------|
| Test values | 8, 16, 32, 64 | 64, 128, 256 | 2, 3, 4  | 0.5          | ReLU                |
| GCN         | 16            | 128          | 3        | 0.5          | ReLU                |
| GAT         | 16            | 128          | 2        | 0.5          | ReLU                |
| GIN         | 16            | 128          | 3        | 0.5          | ReLU                |
| GT          | 16            | 128          | 2        | 0.5          | ReLU                |
| MPNN        | 16            | 128          | 3        | 0.5          | ReLU                |
| GCN_EWN     | 16            | 128          | 3        | 0.5          | ReLU                |
| EGAT        | 16            | 128          | 3        | 0.5          | ReLU                |
| GINE        | 16            | 128          | 2        | 0.5          | ReLU                |

Table S2. The training predication performance of DL models.

| Models  | MAE   | RMSE  | r     |
|---------|-------|-------|-------|
| GCN     | 1.537 | 2.110 | 0.837 |
| GAT     | 1.461 | 1.986 | 0.856 |
| GIN     | 1.872 | 2.462 | 0.774 |
| GT      | 2.489 | 3.253 | 0.539 |
| MPNN    | 1.543 | 2.108 | 0.835 |
| GCN_EWN | 1.480 | 2.019 | 0.857 |
| EGAT    | 1.556 | 2.148 | 0.830 |
| GINE    | 1.577 | 2.158 | 0.826 |

Table S3. The setting of hyperparameters of DL models with interaction.

| Models      | batch_size    | n_hidden     | n_layers | Dropout_rate | Activation Function |
|-------------|---------------|--------------|----------|--------------|---------------------|
| Test values | 8, 16, 32, 64 | 64, 128, 256 | 2, 3, 4  | 0.5          | ReLU                |
| GCN         | 16            | 128          | 3        | 0.5          | ReLU                |
| GAT         | 16            | 128          | 3        | 0.5          | ReLU                |
| GIN         | 16            | 256          | 3        | 0.5          | ReLU                |
| GT          | 16            | 128          | 2        | 0.5          | ReLU                |
| MPNN        | 16            | 128          | 3        | 0.5          | ReLU                |
| GCN_EWN     | 16            | 128          | 3        | 0.5          | ReLU                |
| EGAT        | 16            | 128          | 3        | 0.5          | ReLU                |
| GINE        | 16            | 128          | 2        | 0.5          | ReLU                |

Table S4. Comparison of time consumption for calculating descriptors\*.

| Descriptors       | Process time (s)                  |                               |
|-------------------|-----------------------------------|-------------------------------|
|                   | Training set (n=848) <sup>a</sup> | Test set (n=212) <sup>a</sup> |
| RDKit             | 120.95                            | 29.52                         |
| Mordred           | 2237.21                           | 558.22                        |
| Graph Preparation | 85.96                             | 23.46                         |

<sup>a</sup>n represents number of processed D/A pairs.

\*These computational tasks were executed on a workstation featuring dual-socket Intel Xeon 6230R CPUs and an NVIDIA GeForce RTX 3090 GPU.

Table S5. The comparison between device performances and their corresponding predicted PCEs in other studies.

| Donor   | Acceptor | Predicted PCE(%) | Reported PCE(%) | Percentage error | Reference |
|---------|----------|------------------|-----------------|------------------|-----------|
| SM1     | PC71BM   | 5.94             | 4.29            | 27.78%           | 8         |
| SM2     | PC71BM   | 6.83             | 5.19            | 24.01%           |           |
| SM3     | PC71BM   | 5.74             | 4.27            | 25.61%           |           |
| SM4     | PC71BM   | 5.34             | 5.44            | -1.87%           |           |
| SM4     | Y6       | 12.01            | 11.35           | 5.50%            |           |
| PTB7-Th | ITIC     | 8.09             | 6.52            | 19.41%           | 9         |
| PBDB-T  | ITIC     | 8.43             | 9.96            | -18.15%          |           |
| PM6     | IT-4F    | 13.4             | 10.44           | 22.09%           |           |
| PM6     | Y6       | 16.39            | 15.23           | 7.08%            |           |

Table S6. Manually collected datasets from the literature.

| Sr. No. | Donor      | Acceptor      | PCE    | DOI                              |
|---------|------------|---------------|--------|----------------------------------|
| 1       | D18        | L8-BO         | 19.05  | 10.1002/adma.202204718           |
| 2       | PBDB-TF    | L8-BO         | 18.77  | 10.1002/ange.202110550           |
| 3       | D18        | N3            | 18.56  | 10.1088/1674-4926/42/1/010502    |
| 4       | D18        | Y6            | 18.22  | 10.1088/1674-4926/42/1/010502    |
| 5       | PBDB-TF    | BTP-eC9       | 17.8   | 10.1002/adma.201908205           |
| 6       | PTQ10      | m-BTP-C6Ph    | 17.74  | 10.1007/s11426-021-1114-3        |
| 7       | PM6        | Y6            | 17.72  | 10.1002/ange.202202177           |
| 8       | P5T-2F     | eC9           | 17.7   | 10.1021/acsmaterialslett.1c00328 |
| 9       | PBQx-TF    | eC9-2Cl       | 17.7   | 10.1002/adma.202102420           |
| 10      | D18        | Y6-Se         | 17.7   | 10.1021/jacs.0c08557             |
| 11      | PBDB-TF    | BTP-4Cl       | 17.7   | 10.1002/anie.202102622           |
| 12      | PBDB-TF    | BTP-S9        | 17.56  | 10.1038/s41467-021-24937-5       |
| 13      | PBDB-TF    | A-WSSe-Cl     | 17.51  | 10.1002/anie.202104766           |
| 14      | PTQ10      | Y6            | 17.13  | 10.1007/s11426-021-1114-3        |
| 15      | PTQ10      | p-BTP-C6Ph    | 17.1   | 10.1039/D0EE03506H               |
| 16      | PBDTT1Cl   | Y18-1F        | 17.1   | 10.1002/adma.202105483           |
| 17      | PBCT-2F    | Y6            | 17.1   | 10.1039/D1EE01957K               |
| 18      | PBDB-TF    | CH1007        | 17.08  | 10.1021/jacs.0c07083             |
| 19      | PBDB-TF    | BTP-2F-ThCl   | 17.06  | 10.1016/j.joule.2020.03.023      |
| 20      | PBDB-T-2Cl | Y6            | 17.037 | 10.1007/s11426-019-9669-3        |
| 21      | PBDB-TF    | SY1           | 16.83  | 10.1002/adfm.202000456           |
| 22      | PBDB-TF    | BTP-ClBr      | 16.82  | 10.1002/aenm.202002649           |
| 23      | PBDB-T     | LL3           | 16.82  | 10.1002/adfm.202103445           |
| 24      | PM6        | Y6-1O         | 16.81  | 10.1021/acs.chemmater.2c02851    |
| 25      | PM6        | BT-BO-L4F     | 16.81  | 10.1002/aenm.202102172           |
| 26      | SZ5        | BPT-4F        | 16.8   | 10.1021/acsenergylett.0c01688    |
| 27      | PBDB-TF    | BTP-PhC6      | 16.7   | 10.1016/j.nanoen.2020.105087     |
| 28      | PBDB-TF    | BP5T-4F       | 16.7   | 10.1002/aenm.202003177           |
| 29      | PBDB-TF    | AQx-2         | 16.64  | 10.1002/adma.201906324           |
| 30      | PBDB-TF    | Y6-O          | 16.6   | 10.1039/D0TA10953C               |
| 31      | PBDB-TF    | Y11           | 16.54  | 10.1038/s41566-019-0573-5        |
| 32      | PM6        | Y18           | 16.37  | 10.1007/s11426-020-9747-9        |
| 33      | PBDB-TF    | BTP-S2        | 16.37  | 10.1002/adma.202001160           |
| 34      | PTQ11      | TPT10         | 16.32  | 10.1021/jacs.9b09939             |
| 35      | PBDB-TF    | BTIC-2Cl-yCF3 | 16.31  | 10.1002/ange.202013053           |
| 36      | SZ5        | BPS-4F        | 16.3   | 10.1021/acsenergylett.0c01688    |
| 37      | PM6        | TPT10         | 16.26  | 10.1039/d0ta04941g               |
| 38      | PBDB-TF    | SY3           | 16.23  | 10.1002/adfm.202000456           |
| 39      | D16        | Y6            | 16.22  | 10.1016/j.scib.2019.10.002       |
| 40      | W1         | Y6            | 16.16  | 10.1016/j.scib.2019.11.030       |
| 41      | PBDB-TF    | Y6-Se         | 16.02  | 10.1039/D0TA06658C               |
| 42      | P2F-EHp    | BTPPT-4F      | 16.02  | 10.1007/s11426-019-9457-5        |

|    |            |               |       |                               |
|----|------------|---------------|-------|-------------------------------|
| 43 | PBDB-TF    | S-WSeSe-Cl    | 16.01 | 10.1002/anie.202104766        |
| 44 | PBDB-TF    | SY2           | 16.01 | 10.1002/adfm.202000456        |
| 45 | PTQ10      | o-BTP-PhC6    | 16    | 10.1039/D0EE03506H            |
| 46 | PM6        | Y6-BO         | 16    | 10.1002/anie.202016265        |
| 47 | PBDB-TF    | BTN-4F        | 15.82 | 10.1002/sstr.202000052        |
| 48 | PBDB-TF    | HDO-4Cl       | 15.6  | 10.1039/D0QM00633E            |
| 49 | PBDB-TF    | BTIC-CF3-y    | 15.59 | 10.1016/j.joule.2020.02.004   |
| 50 | PBDB-TF    | BTP-ClBr2     | 15.54 | 10.1002/aenm.202002649        |
| 51 | PBDB-TF    | DTTC-4Cl      | 15.42 | 10.1039/C9TA12605H            |
| 52 | PBDB-T-2Cl | TPIC-4Cl      | 15.4  | 10.1002/solr.202000250        |
| 53 | PBDB-TF    | Y22           | 15.4  | 10.1039/D0TA01636E            |
| 54 | PBDB-TF    | BTP-2Cl-delta | 15.4  | 10.1021/acsami.0c16389        |
| 55 | PTQ10      | BTP-Se        | 15.3  | 10.1016/j.cej.2022.135998     |
| 56 | B1         | BO-4Cl        | 15.3  | 10.1007/s40843-020-1269-9     |
| 57 | BTR-Cl     | BTP-FC1-FC1   | 15.3  | 10.1002/advs.202004262        |
| 58 | PBDB-TF    | BTP-6F        | 15.3  | 10.1002/anie.201915030        |
| 59 | P_chen     | Y18-1D        | 15.25 | 10.1039/D0SE01343A            |
| 60 | PBDB-TF    | M34           | 15.24 | 10.1002/anie.202007907        |
| 61 | PBDB-TF    | BDTP-4F       | 15.24 | 10.1002/sml.202001942         |
| 62 | PBDB-T     | BTTPC-Br      | 15.22 | 10.1039/C9TA11285E            |
| 63 | Qx-12F     | Y6            | 15.21 | 10.1039/D1TA01500A            |
| 64 | PBDB-TF    | BTP-S1        | 15.21 | 10.1002/adma.202001160        |
| 65 | PBDB-TF    | A4T-16        | 15.2  | 10.1038/s41467-021-25394-w    |
| 66 | TPD-3      | Y6            | 15.2  | 10.1002/aenm.202102648        |
| 67 | PBDB-TF    | ABP4T-4F      | 15.2  | 10.1002/aenm.202003177        |
| 68 | PBDB-T-SF  | Y6            | 15.18 | 10.1039/C9MH00844F            |
| 69 | PBDB-T     | LL4           | 15.18 | 10.1002/adfm.202103445        |
| 70 | PBDB-T     | H2            | 15.12 | 10.1002/anie.202006081        |
| 71 | PTzBI-oF   | PFA1          | 15.11 | 10.1021/acsenergylett.0c02053 |
| 72 | PBDB-TF    | BTCT-2Cl      | 15.1  | 10.1021/acs.chemmater.0c01245 |
| 73 | PBDB-TF    | FO-2F         | 15.05 | 10.1039/D0TA03087B            |
| 74 | PBDB-TF    | IPTBO-4Cl     | 15    | 10.1039/D0TA00651C            |
| 75 | PBDB-TF    | IPT-4F        | 14.96 | 10.1039/D0TA00651C            |
| 76 | PBDB-TF    | Y6-2Se        | 14.94 | 10.1039/D0TA06658C            |
| 77 | PBDB-T     | Y14           | 14.92 | 10.1039/C9QM00499H            |
| 78 | PBDB-T-2Cl | TPIC-4F       | 14.9  | 10.1002/solr.202000250        |
| 79 | J52        | NoCA-5        | 14.82 | 10.1002/anie.202106753        |
| 80 | PBDB-T     | PY5-BTZ       | 14.82 | 10.1021/acs.chemmater.1c02302 |
| 81 | PM6        | PTIC-4Cl      | 14.81 | 10.1021/acsami.1c02652        |
| 82 | PBB-Cl     | IT-4F         | 14.8  | 10.1039/D0TA04734A            |
| 83 | PBDB-TF    | M4            | 14.75 | 10.1039/D0TA09352C            |
| 84 | PTO2       | IT-4F         | 14.7  | 10.1021/jacs.8b12937          |
| 85 | PBB-F      | IT-4F         | 14.7  | 10.1039/D0TA04734A            |
| 86 | PBDB-TF    | TPQx-6F       | 14.62 | 10.1039/D0QM00034E            |

|     |            |             |       |                               |
|-----|------------|-------------|-------|-------------------------------|
| 87  | PBDB-TF    | BTP-ClBr1   | 14.56 | 10.1002/aenm.202002649        |
| 88  | J52        | BN-2F       | 14.53 | 10.1002/ange.202100390        |
| 89  | PBDB-T     | BTPPC       | 14.51 | 10.1039/C9TA11285E            |
| 90  | PM6        | BTPPC-Br    | 14.46 | 10.1002/adfm.202108614        |
| 91  | PM6        | TB-4Cl      | 14.45 | 10.1021/acsami.1c02652        |
| 92  | PBDBSe-Cl  | Y6          | 14.44 | 10.1021/acs.macromol.0c00405  |
| 93  | J101       | ZITI        | 14.43 | 10.1039/C9TA03272J            |
| 94  | PBDB-T-2Cl | IT-4F       | 14.4  | 10.1002/adma.201800868        |
| 95  | PBDB-T     | PJ1-H       | 14.4  | 10.1016/j.nanoen.2020.104718  |
| 96  | PBDB-T     | LL3-2Cl     | 14.4  | 10.1002/adfm.202103445        |
| 97  | H31        | Y6          | 14.4  | 10.1021/acsami.3c14992        |
| 98  | ZR1        | Y6          | 14.34 | 10.1038/s41467-019-13292-1    |
| 99  | PBDB-T     | PYTT-2      | 14.32 | 10.1021/acs.chemmater.0c04253 |
| 100 | PBDB-TF    | IDST-4F     | 14.3  | 10.1016/j.nanoen.2020.104861  |
| 101 | PDTB-EF-T  | IT-4F       | 14.2  | 10.1021/jacs.8b02695          |
| 102 | PbiTPD     | Y6          | 14.2  | 10.1021/acsenergylett.9b02842 |
| 103 | PBDB-T     | BTP-Se      | 14.2  | 10.1016/j.cej.2021.132830     |
| 104 | PBDE-DFDT  | IT-4F       | 14.16 | 10.1021/acs.chemmater.9b04971 |
| 105 | PBDB-T     | Y5          | 14.1  | 10.1002/adma.201807577        |
| 106 | PBDB-T-SF  | NCBDT-4Cl   | 14.1  | 10.1007/s11426-018-9334-9     |
| 107 | SM1-F      | Y6          | 14.07 | 10.1002/adma.201908373        |
| 108 | PBDB-TF    | BTIC-BO-4Br | 14.03 | 10.1002/advs.201903784        |
| 109 | PBDB-T     | IPT2F-TT    | 14.02 | 10.1002/adfm.202006141        |
| 110 | PE4        | Y6          | 14.02 | 10.1021/acs.macromol.9b01233  |
| 111 | PBDB-T     | IPT-2F      | 14    | 10.1021/acsami.0c19700        |
| 112 | PBTA-PSF   | ITIC        | 13.91 | 10.1002/solr.201900005        |
| 113 | PBDB-TF    | DTTC-4F     | 13.89 | 10.1039/C9TA12605H            |
| 114 | TPD-3F     | IT-4F       | 13.84 | 10.1039/C7TA10374C            |
| 115 | PTB7-Th    | Coi8DFIC    | 13.8  | 10.1016/j.joule.2018.11.023   |
| 116 | PBDB-TF    | PIST-4F     | 13.8  | 10.1002/cjoc.202100323        |
| 117 | PBDB-TF    | BTSe-4F     | 13.79 | 10.1002/sstr.202000052        |
| 118 | PBDB-TF    | TSeTIC      | 13.71 | 10.1039/C9TA08328F            |
| 119 | PBDB-TF    | IT-4F       | 13.7  | 10.1021/acsami.0c05172        |
| 120 | PBT1-C     | IDTT-C8-TIC | 13.7  | 10.1038/s41467-020-19853-z    |
| 121 | PBDB-TF    | IT-M        | 13.7  | 10.1002/adma.201707170        |
| 122 | PTB7-Th    | AOIC        | 13.7  | 10.1021/jacs.9b08988          |
| 123 | BSFTR      | Y6          | 13.69 | 10.1002/adma.201904283        |
| 124 | PBDB-T-2Cl | BDBSePhCl   | 13.68 | 10.1039/C9TA03177D            |
| 125 | J71        | ZITI-N      | 13.68 | 10.1016/j.isci.2019.08.038    |
| 126 | BTR-Cl     | Y6          | 13.61 | 10.1016/j.joule.2019.09.009   |
| 127 | PBDB-TF    | BTIC-F-m    | 13.61 | 10.1016/j.joule.2020.02.004   |
| 128 | PM6        | ITC-2Cl     | 13.6  | 10.1002/aenm.201900041        |
| 129 | PBDB-T     | PYTT-1      | 13.54 | 10.1021/acs.chemmater.0c04253 |
| 130 | PBDB-TF    | TPQ-F       | 13.51 | 10.1016/j.orgel.2021.106282   |



|     |                   |            |       |                                |
|-----|-------------------|------------|-------|--------------------------------|
| 131 | F1                | IT-4F      | 13.5  | 10.1039/D0TA00098A             |
| 132 | PTQ10             | MO-IDIC-2F | 13.46 | 10.1038/s41467-019-08508-3     |
| 133 | PBDB-TF           | IT-4Cl     | 13.45 | 10.1002/adma.201800868         |
| 134 | PBDB-TF           | 5T-OFIC    | 13.43 | 10.1007/s40843-020-1651-5      |
| 135 | PBDB-T            | Y1         | 13.42 | 10.1038/s41467-019-08386-9     |
| 136 | PBDB-T            | TPT10      | 13.41 | 10.1039/d0ta04941g             |
| 137 | PBDB-T            | IPIC-4Cl   | 13.4  | 10.1021/acseenergylett.9b00147 |
| 138 | PBDB-T            | Y2         | 13.4  | 10.1038/s41467-019-08386-9     |
| 139 | PBDB-TF           | DTC-4F     | 13.37 | 10.1039/C9TA12605H             |
| 140 | PBDB-T-2Cl        | IT-4Cl     | 13.37 | 10.1007/s11426-018-9260-2      |
| 141 | PBDB-TF           | TPDC-4F    | 13.35 | 10.1039/D1TA03643B             |
| 142 | P-FP              | Y6         | 13.34 | 10.1039/D1TA04214A             |
| 143 | PBDB-TF           | Y26        | 13.34 | 10.1002/solr.202100281         |
| 144 | PBDB-TF           | SeTIC4Cl   | 13.32 | 10.1021/acseenergylett.8b01808 |
| 145 | PBDB-TF           | AQx        | 13.31 | 10.1002/adma.201906324         |
| 146 | PBDB-T-2Cl        | IDT6CN-M   | 13.3  | 10.1039/C9TA02243K             |
| 147 | PBDB-T-2Cl        | IDTT-CI-2F | 13.3  | 10.1002/adfm.202102189         |
| 148 | PBDB-TF           | IDT6CN-M   | 13.3  | 10.1039/C9TA02243K             |
| 149 | PBDB-TF           | TPQ-Cl     | 13.28 | 10.1016/j.orgel.2021.106282    |
| 150 | PBDB-TF           | AT-4Cl     | 13.27 | 10.1002/aenm.201803541         |
| 151 | PBDB-T            | Y9         | 13.26 | 10.1016/j.jechem.2019.07.002   |
| 152 | J71               | ITCF       | 13.25 | 10.1021/acs.chemmater.8b05327  |
| 153 | PBDTSF-TZNT       | IT-4F      | 13.25 | 10.1016/j.isci.2018.12.027     |
| 154 | PBDTS-TZNT        | IT-4F      | 11.31 | 10.1016/j.isci.2018.12.027     |
| 155 | PBDB-TF           | BTIC-COOMe | 13.25 | 10.1021/acs.jpcclett.1c01077   |
| 156 | J52               | BN-4F      | 13.24 | 10.1002/ange.202100390         |
| 157 | PBDB-T            | DOC2C6-2F  | 13.24 | 10.1038/s41467-019-11001-6     |
| 158 | J71               | ZITI       | 13.24 | 10.1002/adma.201800403         |
| 159 | PTB7-Th           | ACS8       | 13.2  | 10.1039/C8TA11484F             |
| 160 | PFBDB-T           | C8-ITIC    | 13.2  | 10.1002/adma.201705209         |
| 161 | PTB7-Th           | IEICO-4F   | 13.2  | 10.1002/adma.201806616         |
| 162 | PBDB-T            | SN6IC-4F   | 13.2  | 10.1021/acs.chemmater.8b02276  |
| 163 | PBDB-T            | BT-LIC     | 13.2  | 10.1021/jacs.1c00211           |
| 164 | PBDB-T-2Cl        | TPIC       | 13.2  | 10.1002/solr.202000250         |
| 165 | PTQ10             | IDIC       | 11.33 | 10.1016/j.ccllet.2020.08.051   |
| 166 | J71               | ZITI-C     | 13.18 | 10.1016/j.isci.2019.08.038     |
| 167 | PBDB-T            | BTTIC      | 13.18 | 10.1002/adfm.201803128         |
| 168 | m-PBDTPS-<br>FTAZ | ITIC       | 13.16 | 10.1021/acsami.9b07112         |
| 169 | PTQ10             | TPT10      | 13.14 | 10.1039/d0ta04941g             |
| 170 | PBDB-T            | IPT2F-Ph   | 13.13 | 10.1002/adfm.202006141         |
| 171 | PBDB-TSCl         | IT-4F      | 13.13 | 10.1021/acseenergylett.9b01819 |
| 172 | PTQ10             | ZITI-C     | 13.13 | 10.1021/acs.jpcc.0c05654       |
| 173 | PBDB-T            | INPIC-4F   | 13.13 | 10.1002/adma.201707150         |

|     |            |             |       |                                  |
|-----|------------|-------------|-------|----------------------------------|
| 174 | PBDB-TF    | BTDTTP-4F   | 13.12 | 10.1002/smll.202001942           |
| 175 | PTB7-Th    | o-IO1       | 13.1  | 10.1021/acsmaterialslett.9b00512 |
| 176 | PBDB-TF    | TfIF-4FIC   | 13.1  | 10.1002/aenm.201803657           |
| 177 | PTB7-Th    | IOIC3       | 13.1  | 10.1021/acs.chemmater.8b01677    |
| 178 | PBN-S      | IT-4F       | 13.1  | 10.1039/C8EE03608J               |
| 179 | TTFQx-T1   | Y5          | 13.1  | 10.1002/adma.201807577           |
| 180 | PBDB-T-SF  | IT-4F       | 13.1  | 10.1021/jacs.7b02677             |
| 181 | BTR-Cl     | BTP-2F-2Cl  | 13.1  | 10.1002/advs.202004262           |
| 182 | PTQ10      | IT-4Cl      | 13.04 | 10.1039/c9ta10887d               |
| 183 | PBDB-T     | ZITI        | 13.03 | 10.1002/adma.201800403           |
| 184 | PTB7-Th    | FNIC2       | 13    | 10.1021/jacs.8b04027             |
| 185 | P2F-EHp    | IT-2F       | 12.96 | 10.1038/s41560-018-0263-4        |
| 186 | SM1-S      | Y6          | 12.94 | 10.1002/adma.201908373           |
| 187 | PBDB-TF    | F-2F        | 12.93 | 10.1039/D0TA03087B               |
| 188 | PBZ-ClSi   | IT-4F       | 12.8  | 10.1039/C8TA10662B               |
| 189 | PBDB-T     | m-INPOIC    | 12.8  | 10.1021/acsenergylett.9b01630    |
| 190 | PBDTS-TDZ  | ITIC        | 12.8  | 10.1002/adma.201703973           |
| 191 | PBDB-T     | IDTOT2F     | 12.79 | 10.1021/acsenergylett.8b00928    |
| 192 | PTB7-Th    | BTPV-4F-eC9 | 12.77 | 10.1002/adfm.202102361           |
| 193 | PBDB-TF    | PTB4Cl      | 12.76 | 10.1002/anie.202101867           |
| 194 | PBDB-TF    | Y19         | 12.76 | 10.1007/s11771-020-4501-0        |
| 195 | Qx-10F     | Y6          | 12.75 | 10.1039/D1TA01500A               |
| 196 | PBDB-T     | PY5-2TZ     | 12.73 | 10.1021/acs.chemmater.1c02302    |
| 197 | SM1        | Y6          | 12.72 | 10.1002/adma.201908373           |
| 198 | PBT1-C-2Cl | IT-4F       | 12.7  | 10.1016/j.nanoen.2019.01.039     |
| 199 | PBDB-TF    | C8-ITCC-Cl  | 12.7  | 10.1021/acs.chemmater.9b00980    |
| 200 | PBDB-T     | SNBDT1-F    | 12.7  | 10.1002/solr.202000234           |
| 201 | PBDB-TF    | IDTT-Cl-2F  | 12.7  | 10.1002/adfm.202102189           |
| 202 | QX2        | Y22         | 12.69 | 10.1039/D0TA01636E               |
| 203 | PBDB-TF    | IDTTP-4F    | 12.64 | 10.1002/smll.202001942           |
| 204 | PBDB-TF    | Br-ITIC     | 12.63 | 10.1016/j.nanoen.2019.04.018     |
| 205 | SZ5        | BPF-4F      | 12.6  | 10.1021/acsenergylett.0c01688    |
| 206 | PDBT-Cl    | IT-4F       | 12.6  | 10.1039/C9QM00212J               |
| 207 | PBDB-TF    | BDDEH-4F    | 12.59 | 10.1039/D0TA12288B               |
| 208 | PBDB-T     | BTP-S       | 12.56 | 10.1016/j.cej.2021.132830        |
| 209 | J71        | MeIC        | 12.54 | 10.1002/adma.201706124           |
| 210 | PBDB-T     | IDT2-IC-4Cl | 12.53 | 10.1016/j.orgel.2021.106329      |
| 211 | PBDB-T     | IPT2F-Th    | 12.52 | 10.1002/adfm.202006141           |
| 212 | PBDB-TF    | PT2IC-4Cl   | 12.51 | 10.1021/acsami.1c02652           |
| 213 | FTAZ       | IDIC        | 12.5  | 10.1002/adma.201706363           |
| 214 | PBDB-T-2Cl | BT2FIDT-4Cl | 12.5  | 10.1002/smll.201907681           |
| 215 | J71        | ITIC5       | 12.5  | 10.1039/C8TA05800H               |
| 216 | PBDB-T     | IT-DM       | 12.5  | 10.1002/adma.201602776           |
| 217 | PM6        | F-Cl        | 12.5  | 10.1002/aenm.201902688           |

|     |              |                        |       |                               |
|-----|--------------|------------------------|-------|-------------------------------|
| 218 | PBDB-T       | NITI-Sse               | 12.49 | 10.1246/bcsj.20200322         |
| 219 | J101         | ITIC                   | 12.47 | 10.1039/C9TA03272J            |
| 220 | PTB7-Th      | 3TT-OCIC               | 12.43 | 10.1002/aenm.201901024        |
| 221 | PBDB-T       | PYTT-3                 | 12.41 | 10.1021/acs.chemmater.0c04253 |
| 222 | PBDB-T       | C8-ITIC                | 12.41 | 10.1002/adma.201705209        |
| 223 | BSCI-C2      | IDIC-4Cl               | 12.4  | 10.1021/acsami.0c03977        |
| 224 | PBDB-T       | BCIC2F                 | 12.4  | 10.1002/cssc.202100746        |
| 225 | PDCBT-Cl     | ITIC-Th1               | 12.38 | 10.1021/acs.macromol.9b00793  |
| 226 | PBDB-T       | FOC2C6-2FIC            | 12.36 | 10.1021/acsami.9b18076        |
| 227 | PBDB-TF      | 6T-OFIC                | 12.35 | 10.1007/s40843-020-1651-5     |
| 228 | PBDB-T       | CNDTBT-<br>C8IDT-FINCN | 12.33 | 10.1021/acsami.0c13277        |
| 229 | PCl(4)BDB-T  | IT-4F                  | 12.33 | 10.1002/anie.201807865        |
| 230 | PBDB-T       | QOC6-4Cl               | 12.32 | 10.1021/acsami.1c11412        |
| 231 | J11          | m-ITTC                 | 12.32 | 10.1021/acs.chemmater.8b05352 |
| 232 | J52-Cl       | Y6                     | 12.31 | 10.1021/acs.macromol.9b01233  |
| 233 | PBDB-TF      | ITCPTC                 | 12.31 | 10.1021/acsenergylett.0c01364 |
| 234 | PBDTS-Se-TAZ | ITIC                   | 12.31 | 10.1002/solr.201800186        |
| 235 | PBDB-TF      | BID-4F                 | 12.3  | 10.1016/j.jechem.2020.03.036  |
| 236 | PM6          | NITT-BF                | 12.3  | 10.1016/j.cej.2021.130618     |
| 237 | PBDB-T       | IPTTT-2F               | 12.3  | 10.1039/C9TA07634D            |
| 238 | FTAZ         | IOIC2                  | 12.3  | 10.1002/adma.201704713        |
| 239 | PBDB-T       | CH3-2F                 | 12.28 | 10.1021/acsami.1c09597        |
| 240 | PBT1-C-2Cl   | ITCPTC                 | 10.31 | 10.1039/c9ta01285k            |
| 241 | PBDB-T2F     | a-ITIC-2Cl             | 12.23 | 10.1021/acs.jpcclett.9b01931  |
| 242 | PTBB-m       | ITCPTC                 | 12.22 | 10.1002/aenm.201802686        |
| 243 | PBDB-T       | IXIC-2Cl               | 12.2  | 10.1002/aenm.201801203        |
| 244 | PBDB-TF      | IDTN                   | 12.2  | 10.1002/adma.201704051        |
| 245 | PTN5         | Y12                    | 12.2  | 10.1021/acsami.3c14494        |
| 246 | J71          | Br-ITIC                | 12.19 | 10.1016/j.nanoen.2019.04.018  |
| 247 | PBDB-T       | ITIC-4F                | 12.18 | 10.1002/aenm.201900887        |
| 248 | PBDB-T       | ITOIC-2F               | 12.17 | 10.1021/acs.chemmater.8b01319 |
| 249 | PM6          | 2T2Se-F                | 12.17 | 10.1016/j.cej.2021.132298     |
| 250 | J52          | i-IEICO-4Cl            | 12.16 | 10.1021/acsaeem.1c02608       |
| 251 | PBDTS-TZNT   | ITIC                   | 12.16 | 10.1016/j.isci.2018.12.027    |
| 252 | PBDTSF-TZNT  | ITIC                   | 12.16 | 10.1016/j.isci.2018.12.027    |
| 253 | PBDB-T       | DBT-4F                 | 12.14 | 10.1016/j.cej.2021.128770     |
| 254 | PTQ10        | m-DTC-2Cl              | 12.14 | 10.1002/adfm.202102361        |
| 255 | PBDB-T       | NCBDT                  | 12.12 | 10.1002/adma.201704904        |
| 256 | PBDB-T       | BDTThIT-M              | 12.12 | 10.1039/C7TA10763C            |
| 257 | J71          | AOIC1                  | 12.1  | 10.1021/acs.chemmater.0c04318 |
| 258 | PBDB-T       | BCDT-4Cl               | 12.1  | 10.1021/acsami.0c00837        |
| 259 | PTB7-Th      | IOTIC-2F               | 12.1  | 10.1002/aenm.201801209        |
| 260 | H14          | IDIC-4F                | 12.1  | 10.1002/aenm.202001589        |

|     |            |                       |       |                                |
|-----|------------|-----------------------|-------|--------------------------------|
| 261 | L810       | IT-4F                 | 12.1  | 10.1002/adfm.201808828         |
| 262 | PBDB-TF    | IDTT-Br-2F            | 12.1  | 10.1016/j.orgel.2021.106357    |
| 263 | J71        | IDTN-O                | 12.1  | 10.1039/D0TA10953C             |
| 264 | PBDB-T     | IT-M                  | 12.1  | 10.1016/j.synthmet.2021.116736 |
| 265 | PBDB-BzT   | IT-M                  | 12.1  | 10.1039/C8TA00368H             |
| 266 | FTAZ       | ITIC-Th1              | 12.1  | 10.1039/C7QM00547D             |
| 267 | PTB7-Th    | FOIC                  | 12.1  | 10.1039/c8ta11637g             |
| 268 | PBDB-T     | PY5-PZ                | 12.1  | 10.1021/acs.chemmater.1c02302  |
| 269 | PBDB-T     | FOC6-FIC              | 12.08 | 10.1021/acsami.9b18076         |
| 270 | PM6        | CZTT-4F               | 12.07 | 10.1039/c9ta08573d             |
| 271 | PBDB-T     | a-IT-2OM              | 12.07 | 10.1039/C8TA12530A             |
| 272 | PBDB-T     | ITBC                  | 12.07 | 10.1021/acsami.9b08462         |
| 273 | PBDB-T     | DTCC-BC               | 10.74 | 10.1021/acsami.9b08462         |
| 274 | PBDB-TF    | PT-IDTTIC             | 12.06 | 10.1002/aenm.202001408         |
| 275 | PBTIBDTT   | 4TC-4F-C8C8           | 12.06 | 10.1002/solr.202000359         |
| 276 | PBDB-T     | Y9-2Br                | 12.05 | 10.1039/D1RA01348C             |
| 277 | PBDB-TF    | TTTIC                 | 12.05 | 10.1039/C9TA08328F             |
| 278 | J71        | m-ITIC                | 12.05 | 10.1002/aenm.201702324         |
| 279 | J71        | IT-DM                 | 12.05 | 10.1021/acs.chemmater.8b05327  |
| 280 | PBDB-T     | F-Br                  | 12.05 | 10.1002/aenm.201702870         |
| 281 | PBT1-C     | TTPTTT-4F             | 12.05 | 10.1002/solr.201800246         |
| 282 | PTQ10      | BFC-4F                | 12.05 | 10.1002/solr.202000421         |
| 283 | PBDB-TF    | BTIC-4F               | 12.04 | 10.1039/D1TA03643B             |
| 284 | D18        | 4T-3                  | 12.04 | 10.1002/adfm.202101742         |
| 285 | PBDB-TF    | NNBDT                 | 12.03 | 10.1002/adma.201804723         |
| 286 | PBT1-C     | TPTTT-2F              | 12.03 | 10.1039/C8TA07334A             |
| 287 | PBDB-TF    | IDIC                  | 12.02 | 10.1002/adma.201807832         |
| 288 | PBDS-TZ    | IT-4F                 | 12.01 | 10.1039/C8TA12224E             |
| 289 | PBB-H      | IT-4F                 | 12    | 10.1039/D0TA04734A             |
| 290 | PBDB-TF    | AOIC1                 | 12    | 10.1021/acs.chemmater.0c04318  |
| 291 | PBDB-T     | BTP-N                 | 11.97 | 10.1016/j.cej.2021.132830      |
| 292 | PTB7-Th    | 3TT-CIC               | 11.96 | 10.1002/aenm.201901024         |
| 293 | PBDB-T-2Cl | BDS <sub>e</sub> ThCl | 11.91 | 10.1039/C9TA03177D             |
| 294 | PB3T       | IT-M                  | 11.9  | 10.1039/C6EE03489F             |
| 295 | PBDB-T     | IT-OM-2               | 11.9  | 10.1002/aenm.201700183         |
| 296 | PDCBT-2F   | IT-4F                 | 11.9  | 10.1039/C6TA07672F             |
| 297 | PBDB-TF    | ITIC-6F               | 11.89 | 10.1021/jacs.8b13653           |
| 298 | BTR        | Y6                    | 11.88 | 10.1021/acsaem.1c00617         |
| 299 | PBDB-T     | o-DOC6-2F             | 11.87 | 10.1021/acsami.0c13993         |
| 300 | PBDB-T     | BTCPTO4               | 11.85 | 10.1021/acsaem.0c02083         |
| 301 | PBTA-PS    | ITIC                  | 11.85 | 10.1002/solr.201900005         |
| 302 | PBDB-T     | A702                  | 11.84 | 10.1021/acsaem.1c00584         |
| 303 | J101       | MeIC                  | 11.83 | 10.1016/j.orgel.2020.105880    |
| 304 | FTAZ       | IT-M                  | 11.8  | 10.1002/adma.201808279         |

|     |                  |             |       |                               |
|-----|------------------|-------------|-------|-------------------------------|
| 305 | PBDB-TF          | AOIC2       | 11.8  | 10.1021/acs.chemmater.0c04318 |
| 306 | PTO2             | A4T-16      | 11.8  | 10.1038/s41467-021-25394-w    |
| 307 | PBDB-T           | BTP-4Cl     | 11.8  | 10.1002/anie.202102622        |
| 308 | PBT1-EH          | ITCPTC      | 11.8  | 10.1002/solr.201700044        |
| 309 | PBDB-T           | MS-4Cl      | 11.79 | 10.1002/cssc.202100592        |
| 310 | J61              | m-ITIC      | 11.77 | 10.1021/jacs.6b09110          |
| 311 | PBDT-3TCO        | IT-4F       | 11.77 | 10.1007/s11426-018-9408-7     |
| 312 | PBDB-T           | MS-4F       | 11.75 | 10.1002/cssc.202100592        |
| 313 | PBDTT2Cl         | Y18-1F      | 11.47 | 10.1002/adma.202105483        |
| 314 | PBDT-TDZ         | ITIC        | 11.72 | 10.1002/adma.201703973        |
| 315 | PFBDB-T          | ITIC        | 11.71 | 10.1002/adma.201705209        |
| 316 | J52              | NoCA-1      | 11.71 | 10.1002/anie.202106753        |
| 317 | PBDB-T           | NNBDT       | 11.7  | 10.1002/aenm.201800424        |
| 318 | FTAZ             | F9IC        | 11.7  | 10.1021/acs.chemmater.8b02222 |
| 319 | PFOPB            | IT-4F       | 11.7  | 10.1039/C8TA11006A            |
| 320 | J71              | IT-4F       | 11.66 | 10.1021/acs.chemmater.8b05327 |
| 321 | PBDB-TF          | Y25         | 11.65 | 10.1002/solr.202100281        |
| 322 | J91              | m-ITIC      | 11.63 | 10.1002/adma.201703344        |
| 323 | J71              | ITCPTC      | 11.63 | 10.1002/adma.201706124        |
| 324 | PBDB-T           | ITC6-IC     | 11.61 | 10.1002/adfm.201705095        |
| 325 | PBDB-TF          | IDTT-M-2F   | 11.6  | 10.1002/adfm.202102189        |
| 326 | PvBDTTAZ         | O-IDTBR     | 11.6  | 10.1021/jacs.7b01606          |
| 327 | PBDB-T           | BTTBo-4FN   | 11.6  | 10.1039/D1TC03259C            |
| 328 | PBT-Cl           | IT-4F       | 11.6  | 10.1039/C8TA10923K            |
| 329 | P-CIT            | m-ITIC      | 11.61 | 10.1021/acsami.1c00327        |
| 330 | J71              | CTSe-IC     | 11.59 | 10.1021/acsami.1c12028        |
| 331 | PBDTTAZ-<br>NaPh | ITIC        | 11.56 | 10.1039/C8TA07134A            |
| 332 | PM6              | BDTN-BF     | 11.54 | 10.1021/acsami.9b22093        |
| 333 | J52-2Cl          | ITIC        | 11.53 | 10.1021/acs.jpcclett.8b03247  |
| 334 | PBT1-C           | TPPTTT-2F   | 11.52 | 10.1002/solr.201800246        |
| 335 | PTZ1             | IDIC        | 11.5  | 10.1002/adma.201702291        |
| 336 | PBDB-T           | X-PCIC      | 11.5  | 10.1002/smtd.201900531        |
| 337 | PBQx-TF          | F-BTA3      | 11.5  | 10.1002/adma.202102420        |
| 338 | J71              | BTIDIC      | 11.5  | 10.1021/acsapm.0c00748        |
| 339 | PBDB-TF          | HF-PCIC     | 11.49 | 10.1039/C8TA03753A            |
| 340 | PBDB-T           | F-Cl        | 11.47 | 10.1002/aenm.201702870        |
| 341 | PBDTS-NQx        | ITIC        | 11.47 | 10.1002/adfm.201701491        |
| 342 | J52              | i-IEICO-2Cl | 11.45 | 10.1021/acsaeem.1c02608       |
| 343 | PBDB-TF          | ITIC-3F     | 11.44 | 10.1021/jacs.8b13653          |
| 344 | PBDB-T           | GL1         | 11.43 | 10.1021/acsami.1c13035        |
| 345 | P-FT             | m-ITIC      | 11.43 | 10.1039/D1TA04214A            |
| 346 | J71              | ITIC        | 11.41 | 10.1038/ncomms13651           |
| 347 | PBDB-T           | ITCC        | 11.4  | 10.1002/adma.201700254        |

|     |              |                       |       |                               |
|-----|--------------|-----------------------|-------|-------------------------------|
| 348 | PBDB-T-2C1   | ITCC-C1               | 11.4  | 10.1002/adfm.202102189        |
| 349 | TPD-3F       | Y6                    | 11.4  | 10.1002/aenm.202102648        |
| 350 | PBDB-T-2C1   | IDTT-Br-2F            | 11.4  | 10.1016/j.orgel.2021.106357   |
| 351 | PBDB-T       | IDT6CN-M              | 11.4  | 10.1039/C9TA02243K            |
| 352 | PBDB-T       | IPTT-2F               | 11.4  | 10.1039/C9TA07634D            |
| 353 | PBQ-4F       | ITIC                  | 11.34 | 10.1002/adma.201604241        |
| 354 | BTR          | N3                    | 11.34 | 10.1021/acsaem.1c02534        |
| 355 | PBDB-TF      | 2FIFIC                | 11.34 | 10.1039/D0TC04749J            |
| 356 | J71          | m-IDTIDT-FIC          | 11.32 | 10.1039/C8TA11972D            |
| 357 | J71          | ITC6-IC               | 11.32 | 10.1039/c8ee02560f            |
| 358 | PBDB-T       | IDT-EDOT              | 11.32 | 10.1039/C8TA08410F            |
| 359 | PBDB-T       | BDTIT-M               | 11.31 | 10.1039/C7TA10763C            |
| 360 | PBDB-T-2C1   | IDTT-M-2F             | 11.3  | 10.1002/adfm.202102189        |
| 361 | J101         | IT-4F                 | 11.3  | 10.1039/D0TC03095C            |
| 362 | PBDB-T       | IXIC                  | 11.3  | 10.1002/aenm.201801203        |
| 363 | BTR          | BO-4Cl                | 11.3  | 10.1007/s40843-020-1269-9     |
| 364 | J52-F        | BTA5                  | 11.27 | 10.1007/s11426-020-9840-x     |
| 365 | PBDB-T       | ITCT                  | 11.27 | 10.1016/j.ccllet.2017.11.018  |
| 366 | L1           | IBCT                  | 11.26 | 10.1039/d0ta02427a            |
| 367 | PBDB-T       | IT-4F                 | 11.26 | 10.1016/j.orgel.2022.106495   |
| 368 | DRTB-T-C4    | IT-4F                 | 11.24 | 10.1021/acs.chemmater.8b00287 |
| 369 | PBDB-T       | BTC6-4F               | 11.23 | 10.1039/D1NJ01978C            |
| 370 | PBDB-T       | CNDTBT-<br>C8IDT-INCN | 11.22 | 10.1021/acsaem.1c13277        |
| 371 | PBDB-T2F     | ITIC-2Cl-beta         | 11.21 | 10.1021/acs.jpcclett.9b01931  |
| 372 | PTB7-Th      | 6-IF2F                | 11.2  | 10.1021/acsaem.1c13404        |
| 373 | PBDB-TF      | ITCC-C1               | 11.2  | 10.1002/adfm.202102189        |
| 374 | PBDB-T       | FDNCTF                | 11.2  | 10.1021/acs.chemmater.7b02811 |
| 375 | PBDB-T       | IXIC-4Cl              | 11.2  | 10.1002/aenm.201801203        |
| 376 | PTB7-Th      | BT-CIC                | 11.2  | 10.1021/jacs.7b11278          |
| 377 | PTB7-Th      | IUIC                  | 11.2  | 10.1021/acs.chemmater.7b04251 |
| 378 | PBDB-T       | BT-BO-L4F             | 11.2  | 10.1021/jacs.1c00211          |
| 379 | PBDB-TF      | PZ1                   | 11.2  | 10.1007/s11426-019-9466-6     |
| 380 | PBDB-T       | IDTT-OB               | 11.19 | 10.1021/acsaem.8b19596        |
| 381 | PBDB-T       | IDT2Se-4F             | 11.19 | 10.1039/C8TA00783G            |
| 382 | PTQ10        | MO-IDIC               | 11.16 | 10.1038/s41467-019-08508-3    |
| 383 | PBDB-TF      | M2                    | 11.16 | 10.1039/D0TA09353C            |
| 384 | 2T-TTC-BDTFT | m-ITIC                | 11.15 | 10.1021/acs.macromol.8b02360  |
| 385 | PBDB-TF      | IT-BT-ICN             | 11.14 | 10.1021/acsaem.1c01872        |
| 386 | PffBT4T-2DT  | EH-IDTBR              | 11.1  | 10.1021/acsaem.1c00390        |
| 387 | PBDB-T       | DOC2C6-IC             | 11.1  | 10.1038/s41467-019-11001-6    |
| 388 | PBDE-TT      | IT-4F                 | 11.1  | 10.1021/acs.chemmater.9b04971 |
| 389 | PTB7-Th      | O-IDTBCN              | 11.1  | 10.1002/adfm.201808429        |
| 390 | PBDB-T       | IE-4Cl                | 11.1  | 10.1021/acsaem.9b10243        |

|     |              |               |       |                                  |
|-----|--------------|---------------|-------|----------------------------------|
| 391 | PTB7-Th      | 6TIC          | 11.07 | 10.1002/aenm.201702831           |
| 392 | J81          | m-ITIC        | 11.05 | 10.1002/aenm.201700746           |
| 393 | PIDTTDTffBTA | Y6            | 11.05 | 10.1021/acsmacrolett.9b00704     |
| 394 | J71          | IDTT-BH       | 11.05 | 10.1039/C8TA00764K               |
| 395 | PBT1-C       | IT-2F         | 11.04 | 10.1002/adfm.201807006           |
| 396 | FTAZ         | ITIC2         | 11    | 10.1002/adma.201702125           |
| 397 | PBDB-TF      | IT-DOH        | 11    | 10.1002/aenm.201903650           |
| 398 | J61          | Y5            | 11    | 10.1002/adma.201807577           |
| 399 | J71          | AOIC2         | 11    | 10.1021/acs.chemmater.0c04318    |
| 400 | BO2FC8       | m-ITIC-OR-4Cl | 11    | 10.1039/C8TA11059J               |
| 401 | J52          | BN-0F         | 11    | 10.1002/ange.202100390           |
| 402 | PBDB-T       | O-NTNC        | 11    | 10.1002/solr.201800053           |
| 403 | PBDB-T       | BTOIC         | 10.96 | 10.1002/adfm.201803128           |
| 404 | PBDB-T       | IDTT-OBH      | 10.93 | 10.1039/C8TA00764K               |
| 405 | PTBTz-2      | ITIC          | 10.92 | 10.1021/acs.chemmater.7b01650    |
| 406 | PBDB-T-SF    | ITCT          | 10.92 | 10.1039/C9MH00844F               |
| 407 | PBDB-TF      | PZ-dIDTC6     | 10.91 | 10.1016/j.synthmet.2021.116838   |
| 408 | PBDB-T       | AT-NC         | 10.91 | 10.1002/aenm.201803541           |
| 409 | PTQ10        | ITIC          | 10.9  | 10.1021/acsami.9b22666           |
| 410 | PTFB-O       | ITIC-Th       | 10.9  | 10.1002/aenm.201701674           |
| 411 | J71          | IDTN          | 10.9  | 10.1039/D0TA10953C               |
| 412 | PTB7-Th      | F8IC          | 10.9  | 10.1016/j.joule.2018.11.011      |
| 413 | J71          | Y22           | 10.89 | 10.1039/D0TA01636E               |
| 414 | J71          | SeCT-IC       | 10.89 | 10.1021/acsami.1c12028           |
| 415 | PBDB-T-2Cl   | DTSiC-TC      | 10.88 | 10.1021/acsami.1c06360           |
| 416 | PBDB-T       | TTIC          | 10.87 | 10.1007/s40843-017-9084-x        |
| 417 | PDCBT-F      | ITIC-Th1      | 10.85 | 10.1021/acs.macromol.9b00793     |
| 418 | PBDB-T       | F-F           | 10.85 | 10.1002/aenm.201702870           |
| 419 | PBDB-T       | BDCPDT-BC     | 10.82 | 10.1021/acsami.9b08462           |
| 420 | J62          | ITIC          | 10.81 | 10.1021/acs.macromol.8b01036     |
| 421 | J52          | UF-Qx-2Cl     | 10.81 | 10.1016/j.cej.2021.131473        |
| 422 | PBDB-T       | IE-4F         | 10.8  | 10.1021/acsami.9b10243           |
| 423 | FTAZ         | INIC2         | 10.8  | 10.1021/jacs.6b12755             |
| 424 | PBDB-T       | FOC6-IC       | 10.8  | 10.1021/acsami.9b18076           |
| 425 | PBDB-TF      | IE-4F         | 9.3   | 10.1021/acsami.9b10243           |
| 426 | PBDB-TF      | IT6-4F        | 10.8  | 10.1039/D0TA03985C               |
| 427 | PBDB-T       | IT-OM-3       | 10.8  | 10.1002/aenm.201700183           |
| 428 | PTB7-Th      | p-IO1         | 10.8  | 10.1021/acsmaterialslett.9b00512 |
| 429 | PBPD-Th      | ITIC          | 10.8  | 10.1002/adma.201606396           |
| 430 | PBDB-T       | NIBT          | 10.8  | 10.1021/acs.chemmater.9b03329    |
| 431 | PBDB-TF      | C8-ITCC       | 10.8  | 10.1021/acs.chemmater.9b00980    |
| 432 | PBDB-T       | IDTTA         | 10.8  | 10.1039/C9TA11752K               |
| 433 | P-CIT        | Y6            | 11.03 | 10.1021/acsami.1c00327           |
| 434 | PBDB-TF      | PF2-DTSi      | 10.77 | 10.1016/j.joule.2020.01.014      |

|     |            |           |       |                               |
|-----|------------|-----------|-------|-------------------------------|
| 435 | PBDB-T     | BT-IC     | 10.76 | 10.1039/c9tc01214a            |
| 436 | PBDB-TF    | ITIC      | 10.75 | 10.1039/c9ta04789a            |
| 437 | PCE10-2Cl  | IT-4F     | 10.72 | 10.1039/D0TA11203H            |
| 438 | FTAZ       | ITIC-Th3  | 10.7  | 10.1039/C7QM00547D            |
| 439 | PBDB-T     | A701      | 10.7  | 10.1021/acsmacrolett.0c00234  |
| 440 | PBFTT      | IT-4Cl    | 10.7  | 10.1039/C9CP01101C            |
| 441 | PBDB-TF    | ITCC-Br   | 10.7  | 10.1016/j.orgel.2021.106357   |
| 442 | PBDB-T     | R10-4Cl   | 10.7  | 10.1021/acs.chemmater.8b05047 |
| 443 | PTB7-Th    | FRdCN2    | 10.7  | 10.1039/C7CC08440D            |
| 444 | PTQ10      | ZITI-S    | 10.69 | 10.1002/aenm.201903298        |
| 445 | PTQ10      | ZITI-N    | 7.06  | 10.1002/aenm.201903298        |
| 446 | J71        | IT-M      | 10.68 | 10.1021/acsenergylett.8b00100 |
| 447 | PBDB-TF    | DTP-in-F  | 10.66 | 10.1021/acsami.1c06299        |
| 448 | P105       | ITIC-F    | 10.65 | 10.1021/acsaem.9b01726        |
| 449 | PBDB-T     | ITOIC-F   | 10.65 | 10.1021/acs.chemmater.8b01319 |
| 450 | P-FT       | Y6        | 10.61 | 10.1039/D1TA04214A            |
| 451 | J81        | ITIC      | 10.6  | 10.1002/aenm.201700746        |
| 452 | PTT4FB     | IDIC      | 10.6  | 10.1039/C8TA08769E            |
| 453 | PBDB-T     | p-INPOIC  | 10.6  | 10.1002/adfm.201903269        |
| 454 | J61        | ITIC      | 10.57 | 10.1021/jacs.6b09110          |
| 455 | PTB7-Th    | NOBDT     | 10.55 | 10.1002/adma.201707508        |
| 456 | PBDB-T     | QCIC3     | 10.55 | 10.1002/cssc.202100689        |
| 457 | J52        | UF-Qx-2F  | 10.54 | 10.1016/j.cej.2021.131473     |
| 458 | TTFQx-T1   | ITIC      | 10.52 | 10.1039/C7TA10262C            |
| 459 | PBDB-T     | BT-dIDT   | 10.52 | 10.1016/j.solener.2020.01.032 |
| 460 | PTBTz-2    | IT-M      | 10.51 | 10.1039/c9ta04286e            |
| 461 | PBT-SF     | IT-4F     | 10.51 | 10.1039/C8TA05207G            |
| 462 | PBDB-T-2Cl | BTCIC-4Cl | 10.5  | 10.1021/acsami.0c01850        |
| 463 | PBDB-T-2Cl | ITCC-Br   | 10.5  | 10.1016/j.orgel.2021.106357   |
| 464 | PTQ9       | Y6        | 10.5  | 10.1002/adma.201905480        |
| 465 | J71        | AOIC      | 10.5  | 10.1021/acs.chemmater.0c04318 |
| 466 | J71        | BDT-IC    | 10.5  | 10.1002/solr.201700107        |
| 467 | asy-PBDBTN | ITIC      | 10.5  | 10.1021/acs.chemmater.7b02495 |
| 468 | PBFZ-OP    | ITIC      | 10.5  | 10.1039/C7TA06476D            |
| 469 | J52-Cl     | BTA3      | 10.5  | 10.1016/j.orgel.2021.106195   |
| 470 | PBDB-TF    | PN1       | 10.5  | 10.1039/C9TA04611A            |
| 471 | PTB7-Th    | CTIC-4F   | 10.5  | 10.1021/acsenergylett.9b00721 |
| 472 | PBDB-TF    | F-M       | 10.49 | 10.1002/adma.201804723        |
| 473 | J71        | BT-IC     | 10.46 | 10.1039/C7EE00844A            |
| 474 | PTB7-Th    | 6-IF4F    | 10.46 | 10.1021/acsami.1c13404        |
| 475 | PTB7-Th    | Y14       | 10.44 | 10.1039/C9QM00499H            |
| 476 | FTAZ       | ITIC-Th   | 9.72  | 10.1002/advs.201801560        |
| 477 | PTB7-Th    | 4TIC      | 10.43 | 10.1021/acs.chemmater.7b02853 |
| 478 | PBDB-T     | NFBDT     | 10.42 | 10.1021/jacs.7b01170          |



|     |            |                 |       |                                |
|-----|------------|-----------------|-------|--------------------------------|
| 479 | PTB7-Th    | ITCT            | 10.42 | 10.1039/c7ta10391c             |
| 480 | PBDB-T     | IDIC            | 10.41 | 10.1002/adma.201807832         |
| 481 | PBDB-T     | ITIC-OE         | 10.4  | 10.1039/c7ta10136h             |
| 482 | PFBZ       | ITIC            | 10.4  | 10.1002/solr.201700020         |
| 483 | H11        | IDIC-4F         | 10.4  | 10.1002/aenm.202001589         |
| 484 | PBDB-TF    | A4T-23          | 10.4  | 10.1038/s41467-021-25394-w     |
| 485 | PBDB-TF    | BT-LIC          | 10.4  | 10.1021/jacs.1c00211           |
| 486 | PBDB-T     | IT-DOH          | 10.4  | 10.1002/aenm.201903650         |
| 487 | 3BDT-5     | Y6              | 10.4  | 10.1039/D1TA01680F             |
| 488 | PBDB-T-2C1 | BO2FIDT-4C1     | 10.4  | 10.1002/smll.201907681         |
| 489 | PBZ-m-CF3  | ITIC            | 10.4  | 10.1039/C7TA11059F             |
| 490 | HFQx-T     | ITTC            | 10.4  | 10.1039/C7TA02486J             |
| 491 | J52-2F     | A4T-16          | 10.4  | 10.1038/s41467-021-25394-w     |
| 492 | PBDB-T     | IDTT2OT-4F      | 10.4  | 10.1016/j.synthmet.2021.116880 |
| 493 | PBDB-TF    | ITIC-2F_aldrich | 10.38 | 10.1021/jacs.8b13653           |
| 494 | PDCBT      | IDTT-BH         | 10.35 | 10.1039/C8TA00764K             |
| 495 | PBDB-TF    | NCIC            | 10.32 | 10.1016/j.solmat.2021.111046   |
| 496 | PBDB-T     | F-2C1           | 10.31 | 10.1021/acsami.1c13035         |
| 497 | PB24-3TDC  | ITIC-Th         | 10.3  | 10.1002/solr.201800291         |
| 498 | PTB7-Th    | IEICO-4C1       | 10.3  | 10.1002/adma.201703080         |
| 499 | PBDTTT-E-T | IEICO           | 10.3  | 10.1021/jacs.7b01493           |
| 500 | PTB7-Th    | FNIC1           | 10.3  | 10.1021/jacs.8b04027           |
| 501 | PTZ6       | ITIC            | 10.3  | 10.1016/j.nanoen.2017.03.013   |
| 502 | H13        | IDIC-4F         | 10.3  | 10.1002/aenm.202001589         |
| 503 | PBDB-T     | BDCPDT-TTC      | 10.29 | 10.1021/acsenergylett.8b00563  |
| 504 | PBDB-T     | F-M             | 10.29 | 10.1002/adma.201707508         |
| 505 | PBDB-T     | a-IT-2F         | 10.28 | 10.1039/C8TA12530A             |
| 506 | PBDB-TF    | PTIC            | 10.27 | 10.1038/s41467-019-10098-z     |
| 507 | PBDB-T     | o-4TBC-2F       | 10.26 | 10.1002/anie.202010856         |
| 508 | PTzBI      | ITIC            | 10.24 | 10.1002/adma.201606396         |
| 509 | PTB7-Th    | DTPC-DFIC       | 10.21 | 10.1021/jacs.7b13239           |
| 510 | PBDB-TF    | IT-BT-CN        | 10.2  | 10.1021/acsaem.1c01872         |
| 511 | PBDB-T     | BTCIC-4C1       | 10.2  | 10.1021/acsami.0c01850         |
| 512 | PDBT-2F    | IT-4F           | 10.2  | 10.1039/C9QM00212J             |
| 513 | PBDB-TF    | N65-2FIC        | 10.19 | 10.1021/acsaem.0c00689         |
| 514 | PBT1-C     | TPTT-2F         | 10.17 | 10.1039/C8TA07334A             |
| 515 | PBDB-T     | X1-PCIC         | 10.17 | 10.1002/smt.201900531          |
| 516 | PDCBT      | ITIC            | 10.16 | 10.1002/adma.201601803         |
| 517 | PBDB-T     | 4T-3            | 10.15 | 10.1002/adfm.202101742         |
| 518 | PBDB-T     | DF-PCIC         | 10.14 | 10.1002/adma.201705208         |
| 519 | PTFB-O     | ITIC            | 10.13 | 10.1038/ncomms13094            |
| 520 | PTB7-Th    | 6TBA            | 10.13 | 10.1002/adma.201706816         |
| 521 | PBDB-TF    | PF3-DTCO        | 10.13 | 10.1002/solr.202000142         |
| 522 | PBDB-T     | TPDCIC          | 10.12 | 10.1007/s10118-019-2309-x      |

|     |             |             |       |                                |
|-----|-------------|-------------|-------|--------------------------------|
| 523 | PBDT-S-2TC  | ITIC        | 10.12 | 10.1002/adfm.201706517         |
| 524 | PBDB-T      | IDT-OB      | 10.12 | 10.1002/adma.201703527         |
| 525 | PTB7-Th     | SFBRCN      | 10.12 | 10.1002/adma.201606054         |
| 526 | SM1         | IDIC        | 10.11 | 10.1021/acs.chemmater.7b02536  |
| 527 | FTAZ        | INIC1       | 10.1  | 10.1021/jacs.6b12755           |
| 528 | J52         | IEICO-4C1   | 10.1  | 10.1002/adma.201703080         |
| 529 | PfBTAZS     | O-IDTBR     | 10.1  | 10.1002/aenm.201702427         |
| 530 | PBDB-T      | NBDTP       | 10.1  | 10.1002/solr.201700165         |
| 531 | PBDB-T      | ITCC-M      | 10.1  | 10.1021/jacs.7b01493           |
| 532 | PBDB-T-SF   | ITIC2       | 10.1  | 10.1021/acsami.9b11700         |
| 533 | PBDB-T      | BTC6-2F     | 10.1  | 10.1039/D1NJ01978C             |
| 534 | PE31        | BTA5        | 10.08 | 10.1021/acsami.1c03757         |
| 535 | PTB7-Th     | EH-IDTBR    | 10.07 | 10.1039/c9ta07919j             |
| 536 | PBDT-Se-TAZ | ITIC        | 10.07 | 10.1002/solr.201800186         |
| 537 | PTB7-Th     | ATT-1       | 10.07 | 10.1021/jacs.6b08523           |
| 538 | PBDB-T      | FDICTF      | 10.06 | 10.1002/adma.201604964         |
| 539 | PBDB-TF     | F-H         | 10.06 | 10.1039/D0TA03087B             |
| 540 | P2F-EHp     | IT-F        | 10.06 | 10.1038/s41560-018-0263-4      |
| 541 | PBDB-T      | DTCC-IC     | 9.25  | 10.1021/acsami.9b08462         |
| 542 | PDTF-TZNT   | IT-M        | 10.05 | 10.1016/j.nanoen.2018.08.059   |
| 543 | PBDB-T      | YITI-2F     | 10.05 | 10.1039/C8TA04405H             |
| 544 | PBDB-T      | IDTT2OT-2F  | 10.04 | 10.1016/j.synthmet.2021.116880 |
| 545 | PTB7-Th     | IFIC-i-4F   | 10.03 | 10.1016/j.nanoen.2019.06.003   |
| 546 | PBDB-T      | IDTO        | 10.02 | 10.1021/acsami.7b10275         |
| 547 | PBDB-T      | CPIC-2      | 10.01 | 10.1002/asia.202101147         |
| 548 | PBDB-TF     | PFBDT-IDTIC | 10    | 10.1021/acsenergylett.8b02114  |
| 549 | PDCBT       | O-NTNC      | 10    | 10.1002/solr.201800053         |
| 550 | PBDB-T      | NIDT        | 10    | 10.1021/acs.chemmater.9b03329  |
| 551 | PDBT-F      | IT-4F       | 10    | 10.1039/C9QM00212J             |
| 552 | PBDB-T      | IEICO-4F    | 9.98  | 10.1016/j.nanoen.2019.103934   |
| 553 | PBDB-T      | TTIC-M      | 9.97  | 10.1007/s40843-017-9084-x      |
| 554 | PBDB-T      | IDTT-BH     | 9.92  | 10.1039/C8TA00764K             |
| 555 | PTB7-Th     | O-IDTBR     | 9.9   | 10.1002/adfm.201808429         |
| 556 | PBDB-T      | Y1-4F       | 9.9   | 10.1002/adma.201904215         |
| 557 | PM6         | NOCIC       | 9.89  | 10.1016/j.solmat.2021.111046   |
| 558 | PBDB-T      | BDCPDT-IC   | 9.33  | 10.1021/acsami.9b08462         |
| 559 | DRCN5T      | F-2Cl       | 9.89  | 10.1002/aenm.201802021         |
| 560 | PBDB-T      | A4T-16      | 9.88  | 10.1038/s41467-021-25394-w     |
| 561 | PBDB-T      | CZTT-IC     | 9.87  | 10.1039/C9TA08573D             |
| 562 | PBDB-T      | HF-TCIC     | 9.86  | 10.1039/C8QM00609A             |
| 563 | PBDB-TS     | ITIC        | 9.85  | 10.1021/acsami.7b11488         |
| 564 | PBDB-TF     | C8IDT-Br    | 9.85  | 10.1021/acsaeem.1c00369        |
| 565 | PTB7-Th     | AOIC1       | 9.85  | 10.1021/acs.chemmater.0c04318  |
| 566 | PBDB-T      | BT-IC4F     | 9.83  | 10.1039/D0TA03683H             |

|     |                  |           |      |                                |
|-----|------------------|-----------|------|--------------------------------|
| 567 | J61              | IDIC      | 8.69 | 10.1039/c8ta08406h             |
| 568 | PBDB-T           | CZTT-4F   | 9.81 | 10.1039/C9TA08573D             |
| 569 | PT4FB            | IDIC      | 9.81 | 10.1039/C8TA08769E             |
| 570 | PBDB-T           | TPDCNC    | 9.8  | 10.1007/s10118-019-2309-x      |
| 571 | PBDB-T           | ICPDT-4F  | 9.8  | 10.1021/acs.jpcc.0c09663       |
| 572 | P_suman          | Icz-RdCN2 | 9.76 | 10.1039/C8TC05318A             |
| 573 | PTB7-Th          | 6-IFIC    | 9.74 | 10.1021/acsami.1c13404         |
| 574 | H11              | IDIC      | 9.73 | 10.1021/jacs.6b12826           |
| 575 | PBDB-T           | Py-2F     | 9.73 | 10.1016/j.synthmet.2021.116904 |
| 576 | 3MT-Th           | ITIC      | 9.73 | 10.1002/aenm.201700566         |
| 577 | J71              | SIDIC     | 9.71 | 10.1021/acsapm.0c00748         |
| 578 | PBDB-TF          | F8IDT-Br  | 9.7  | 10.1021/acsam.1c00369          |
| 579 | PBDB-TF          | IE-4Cl    | 9.7  | 10.1021/acsami.9b10243         |
| 580 | P3_yang          | IDIC      | 9.7  | 10.1021/acsami.8b04432         |
| 581 | PBDB-T           | IDT-2O    | 9.68 | 10.1002/adma.201703527         |
| 582 | PBDB-T           | IEICO-4Cl | 9.67 | 10.1002/adma.201703080         |
| 583 | 2TC TT_BDTF<br>T | m-ITIC    | 9.65 | 10.1021/acs.macromol.8b02360   |
| 584 | ZR1              | IDIC-4Cl  | 9.64 | 10.1038/s41467-019-13292-1     |
| 585 | PDBT-T1          | ITIC-Th   | 9.6  | 10.1021/jacs.6b02004           |
| 586 | PBDB-T           | IDT-BOC6  | 9.6  | 10.1021/jacs.7b00566           |
| 587 | PBDB-T           | ITIC-Cl4  | 9.6  | 10.1039/C8TC02701C             |
| 588 | PBDB-TF          | ICIF2F    | 9.6  | 10.1039/D0TC04749J             |
| 589 | PBDB-T           | SN6IC     | 9.6  | 10.1021/acs.chemmater.8b02276  |
| 590 | J71              | Y6        | 9.6  | 10.1016/j.nanoen.2020.104447   |
| 591 | PBDB-TF          | NITT-ThCl | 9.58 | 10.1016/j.cej.2021.130618      |
| 592 | PTB7-Th          | ATT-2     | 9.58 | 10.1002/adma.201606574         |
| 593 | J61              | BT-IC     | 9.82 | 10.1039/c8ta08406h             |
| 594 | PBDB-T           | Y6        | 9.55 | 10.1016/j.nanoen.2021.105862   |
| 595 | PBDB-T           | BDTC-4Cl  | 9.54 | 10.1021/acs.chemmater.8b04087  |
| 596 | PBDB-TF          | ITIC-C9   | 9.53 | 10.1021/acs.chemmater.7b04616  |
| 597 | PBDB-T           | NITI-SeS  | 9.52 | 10.1246/bcsj.20200322          |
| 598 | PBDB-TF          | ITzN-C9   | 9.51 | 10.1073/pnas.1807535115        |
| 599 | PTB7-Th          | DTNR      | 9.51 | 10.1021/acs.chemmater.7b03770  |
| 600 | PBDB-TF          | ITCC      | 9.51 | 10.1039/c9ta04789a             |
| 601 | PBDB-T           | TTIC-F    | 9.51 | 10.1007/s40843-017-9084-x      |
| 602 | PTPDBDT          | Cl-ITIC   | 9.5  | 10.1039/C7QM00025A             |
| 603 | PBDB-T           | IDTC-4Cl  | 9.5  | 10.1039/C9TC00162J             |
| 604 | PBDB-T           | CPDT-4F   | 9.47 | 10.1021/acsami.8b20567         |
| 605 | P3HT             | ZY-4Cl    | 9.46 | 10.1039/D0EE01763A             |
| 606 | PDCBT-Cl         | IDIC      | 9.44 | 10.1016/j.joule.2020.04.014    |
| 607 | PTzBI-DT         | ITIC      | 9.43 | 10.1002/adma.201606396         |
| 608 | J52              | BTA3      | 9.41 | 10.1021/acs.chemmater.8b05316  |
| 609 | J52              | IT-M      | 9.4  | 10.1002/adma.201700437         |

|     |             |                       |      |                                  |
|-----|-------------|-----------------------|------|----------------------------------|
| 610 | J52         | IEICO-4F              | 9.4  | 10.1002/anie.201610944           |
| 611 | PTPDBDT     | Br-ITIC               | 9.4  | 10.1039/C7QM00025A               |
| 612 | PTB7-Th     | FRd2                  | 9.4  | 10.1039/C7CC08237A               |
| 613 | HFQx-T      | ITIC                  | 9.4  | 10.1021/acsami.7b03947           |
| 614 | PffBT4T-B   | ITIC-Th               | 9.4  | 10.1002/aenm.201602304           |
| 615 | PBDB-T-SF   | IDIC                  | 9.39 | 10.1039/c9ta01003c               |
| 616 | PTB7-Th     | IDT-BT-R              | 9.39 | 10.1039/C8TC00705E               |
| 617 | PBDB-T      | SFBRCN                | 9.39 | 10.1002/adma.201704271           |
| 618 | PBDB-T      | IDT2Se                | 9.36 | 10.1039/C8TA00783G               |
| 619 | PTBB-p      | ITCPTC                | 9.36 | 10.1002/aenm.201802686           |
| 620 | PTB7-Th     | AOIC2                 | 9.35 | 10.1021/acs.chemmater.0c04318    |
| 621 | PBDB-T      | IDTC                  | 9.35 | 10.1021/acsami.7b10275           |
| 622 | PTB7-Th     | IOIC2                 | 9.33 | 10.1021/acs.chemmater.8b01677    |
| 623 | PBDB-TF     | ITN-C9                | 9.33 | 10.1073/pnas.1807535115          |
| 624 | PTB7-Th     | o-IO2                 | 9.3  | 10.1021/acsmaterialslett.9b00512 |
| 625 | PBDB-T      | R12-4Cl               | 9.3  | 10.1021/acs.chemmater.8b05047    |
| 626 | PBDB-T      | BTCIC                 | 9.3  | 10.1021/acsami.0c01850           |
| 627 | PBDB-TF     | ITCC-M                | 9.3  | 10.1002/adfm.202102189           |
| 628 | PBDB-T      | ITBTR-C6              | 9.29 | 10.1021/acsaem.8b00851           |
| 629 | PBDB-T      | CPDT-4Cl              | 9.28 | 10.1021/acsami.8b20567           |
| 630 | PBDTNS-BDD  | ITIC                  | 9.28 | 10.1002/aenm.201702489           |
| 631 | J61         | SJ-IC                 | 9.27 | 10.1039/C7TA07049G               |
| 632 | J51         | ITIC                  | 9.26 | 10.1002/adma.201601595           |
| 633 | PBT4Cl-Bz   | IT-4F                 | 9.25 | 10.1021/acsaem.8b01447           |
| 634 | PBDB-T      | Ph-DTDP-TIC           | 9.21 | 10.1002/adfm.201705927           |
| 635 | PTFB-P      | ITIC-Th               | 9.2  | 10.1002/aenm.201701674           |
| 636 | PBDB-T      | PZ1                   | 9.19 | 10.1002/ange.201707678           |
| 637 | PTB7-Th     | DTG-IW                | 9.16 | 10.1021/acsaem.0c01097           |
| 638 | PBDB-TF     | AOIC                  | 9.16 | 10.1021/acs.chemmater.0c04318    |
| 639 | PTB7-Th     | IDT-FBTR              | 9.14 | 10.1021/acsami.8b04541           |
| 640 | PBT-F       | IT-4F                 | 9.14 | 10.1039/C8TA10923K               |
| 641 | PBDB-T      | CNDTBT-IDTT-<br>FINCN | 9.13 | 10.1021/acsami.9b15247           |
| 642 | J71         | ZITI-S                | 9.12 | 10.1016/j.isci.2019.08.038       |
| 643 | FTAZ        | COi6FIC               | 9.12 | 10.1039/C8QM00004B               |
| 644 | PBDB-T      | ITTIC                 | 9.12 | 10.1039/C7TA01554B               |
| 645 | PffQx-PS    | ITIC                  | 9.12 | 10.1016/j.nanoen.2016.10.008     |
| 646 | PBDT-NQx    | ITIC                  | 9.11 | 10.1002/adfm.201701491           |
| 647 | PTB7-Th     | IDTT-T                | 9.1  | 10.1021/acsenergylett.8b00366    |
| 648 | PBDB-T      | O-NTIC                | 9.1  | 10.1002/solr.201800053           |
| 649 | PBDTS-DTBTO | ITIC                  | 9.09 | 10.1002/aenm.201600742           |
| 650 | PBDB-TF     | OF-PCIC               | 9.09 | 10.1039/C8TA03753A               |
| 651 | DRTB-T      | IC-C6IDT-IC           | 9.08 | 10.1021/jacs.6b11612             |
| 652 | PTB7-Th     | A2                    | 9.07 | 10.1039/C8TA00704G               |

|     |            |             |      |                               |
|-----|------------|-------------|------|-------------------------------|
| 653 | PBDB-T     | IDT-NTI-2EH | 9.07 | 10.1021/acs.chemmater.7b03733 |
| 654 | FTAZ       | ITIC-Th2    | 9.06 | 10.1039/C7QM00547D            |
| 655 | PDCBT-Cl   | IT-4F       | 9.05 | 10.1016/j.joule.2020.04.014   |
| 656 | J52-F      | BTA3        | 9.04 | 10.1007/s11426-020-9840-x     |
| 657 | PBDB-T     | N65-IC      | 9.03 | 10.1021/acsaem.0c00689        |
| 658 | PTB7-Th    | ITIC-4F     | 9.03 | 10.1021/acs.jpcelett.9b03502  |
| 659 | PBDB-T     | DTNIC8      | 9.03 | 10.1021/acs.chemmater.7b02887 |
| 660 | PBDB-T     | NFTI        | 9.02 | 10.1039/C7QM00585G            |
| 661 | J47        | ITIC        | 9.01 | 10.1016/j.orgel.2018.03.028   |
| 662 | PBDB-T     | IDT-N       | 9    | 10.1039/C7TA06631G            |
| 663 | PBDB-T-2Cl | ITCC-M      | 9    | 10.1002/adfm.202102189        |
| 664 | PBDB-T     | ATT-1       | 9    | 10.1021/acsami.9b10641        |
| 665 | P-4FP      | m-ITIC      | 8.86 | 10.1021/acsami.1c00327        |
| 666 | PBDB-TF    | PF2-DTC     | 8.95 | 10.1002/solr.202000142        |
| 667 | PBQ-QF     | ITIC        | 8.9  | 10.1002/adma.201604241        |
| 668 | PTPDBDT    | I-ITIC      | 8.9  | 10.1039/C7QM00025A            |
| 669 | PBTIBDTT   | ITIC        | 8.89 | 10.1039/c9tc02700a            |
| 670 | PBDB-T     | ITOIC       | 8.87 | 10.1021/acs.chemmater.8b01319 |
| 671 | PBDB-T     | IDTT2F      | 8.85 | 10.1021/acsenergylett.8b00928 |
| 672 | PBDTT      | Y18-1F      | 8.84 | 10.1002/adma.202105483        |
| 673 | PBDB-T     | HF-PCIC     | 8.82 | 10.1002/advs.201800755        |
| 674 | PBDB-T     | YITI-0F     | 8.81 | 10.1039/C8TA04405H            |
| 675 | 2D-PBTC1   | ITIC        | 8.81 | 10.1039/C7TA09837E            |
| 676 | PTB7-Th    | DTC-T-F     | 8.8  | 10.1016/j.orgel.2020.106026   |
| 677 | PTPDBDT    | F-ITIC      | 8.8  | 10.1039/C7QM00025A            |
| 678 | PBDB-T     | TCIC2F      | 8.8  | 10.1002/cssc.202100746        |
| 679 | PTB7-Th    | ITIC        | 8.79 | 10.1002/adma.201702547        |
| 680 | J71        | TTz1        | 8.77 | 10.1039/C8TA09370A            |
| 681 | J12        | m-ITTC      | 8.74 | 10.1021/acs.chemmater.8b05352 |
| 682 | PBDB-T     | IC-C6IDT-IC | 8.71 | 10.1021/jacs.6b00853          |
| 683 | PTB7-Th    | IDTzCR      | 8.71 | 10.1039/C7TC04669C            |
| 684 | PTB7-Th    | ITIC-Th     | 8.7  | 10.1021/jacs.6b02004          |
| 685 | PTB7-Th    | IDT-2BR1    | 8.7  | 10.1007/s11426-016-0336-6     |
| 686 | PTB7-Th    | TIDT-BT-R2  | 8.7  | 10.1002/smttd.201700373       |
| 687 | PTB7-Th    | ITIC-2F_lee | 8.7  | 10.1002/aenm.201801209        |
| 688 | PBDD4T-2F  | ITIC        | 8.69 | 10.1021/acs.macromol.6b00248  |
| 689 | PTQ-10     | BT-Cl       | 8.65 | 10.1016/j.orgel.2021.106132   |
| 690 | PBDB-T     | H-2F        | 8.64 | 10.1021/acsami.1c09597        |
| 691 | PBDB-T     | DBD-4F      | 8.64 | 10.1016/j.cej.2021.128770     |
| 692 | J52-Cl     | BTA5        | 8.64 | 10.1021/acsami.1c03757        |
| 693 | PBDB-T     | NTIC        | 8.63 | 10.1039/C7TA05809H            |
| 694 | PBDB-T     | NTIC-OMe    | 8.61 | 10.1039/C7TA05809H            |
| 695 | J51        | IDSe-T-IC   | 8.58 | 10.1039/C6EE00315J            |
| 696 | PBDB-T     | QCIC1       | 8.58 | 10.1002/cssc.202100689        |

|     |           |              |      |                                |
|-----|-----------|--------------|------|--------------------------------|
| 697 | FTAZ      | ITIC1        | 8.54 | 10.1002/adma.201702125         |
| 698 | J71       | CSeT-IC      | 8.52 | 10.1021/acsami.1c12028         |
| 699 | PBDB-T    | IDT-Tz       | 8.52 | 10.1039/C7TA05774A             |
| 700 | PBDB-T    | N65-2FIC     | 8.51 | 10.1021/acsaeem.0c00689        |
| 701 | PBDB-TF   | Y14          | 8.49 | 10.1039/C9QM00499H             |
| 702 | PBDB-T    | BTC6-0F      | 8.49 | 10.1039/D1NJ01978C             |
| 703 | PDCBT-2F  | ITIC-Th1     | 8.48 | 10.1021/acs.macromol.9b00793   |
| 704 | PffQx-T   | ITIC         | 8.47 | 10.1016/j.nanoen.2016.10.008   |
| 705 | PBCIT     | ITIC         | 8.46 | 10.1021/acsaeem.8b00506        |
| 706 | PBDB-T    | BT2F-IC4F    | 8.45 | 10.1039/D0TA03683H             |
| 707 | FTAZ      | COi6IC       | 8.43 | 10.1039/C8QM00004B             |
| 708 | DRCN5T    | IDIC8-F      | 8.42 | 10.1021/acsaeem.8b00205        |
| 709 | PTB7-Th   | IDTTBM       | 8.4  | 10.1021/acsenergylett.8b00045  |
| 710 | PTB7-Th   | IDT-Tz       | 8.38 | 10.1039/C7TA05774A             |
| 711 | FTAZ      | ITIC         | 8.37 | 10.1039/C7TA07882J             |
| 712 | PBDB-T    | INPIC-2F     | 8.37 | 10.1021/acsami.0c19700         |
| 713 | PBDB-TF   | HFO-PCIC     | 8.36 | 10.1039/C8TA03753A             |
| 714 | PBT1-C    | TPT-2F       | 8.33 | 10.1039/C8TA07334A             |
| 715 | PTB7-Th   | TBTT-BORH    | 8.33 | 10.1021/acsomega.0c04495       |
| 716 | PBDB-TF   | BTIC-OCOMe   | 8.32 | 10.1021/acs.jpcclett.1c01077   |
| 717 | P104      | ITIC-F       | 8.32 | 10.1021/acsaeem.9b01726        |
| 718 | PTB7-Th   | BT-IC        | 8.3  | 10.1021/jacs.7b11278           |
| 719 | PBDT-DTN  | ITIC         | 8.3  | 10.1021/acs.macromol.6b02733   |
| 720 | PBDB-T    | NTIC-Me      | 8.3  | 10.1039/C7TA05809H             |
| 721 | PTB7-Th   | m-IDTIDT-FIC | 8.27 | 10.1039/C8TA11972D             |
| 722 | PBDB-T    | BTTBo-4F     | 8.27 | 10.1039/D1TC03259C             |
| 723 | PTQ-10    | BT-F         | 8.26 | 10.1016/j.orgel.2021.106132    |
| 724 | J61       | BTA3         | 8.25 | 10.1002/adfm.201704507         |
| 725 | FTAZ      | COi6DFIC     | 8.25 | 10.1039/C8QM00004B             |
| 726 | PDCBT     | IDTT-OBH     | 8.24 | 10.1039/C8TA00764K             |
| 727 | PvBDT-CI  | Y6-T         | 8.23 | 10.1016/j.jpowsour.2021.229961 |
| 728 | PBDB-T    | DF-TCIC      | 8.23 | 10.1039/C8QM00609A             |
| 729 | PBT-S-TTz | ITIC         | 8.22 | 10.1039/C6TA03288E             |
| 730 | P-P       | Y6           | 9.49 | 10.1021/acsami.1c00327         |
| 731 | FTAZ      | F7IC         | 8.2  | 10.1021/acs.chemmater.8b02222  |
| 732 | PTB7-Th   | BTDT2R       | 8.19 | 10.1021/acsami.9b09256         |
| 733 | PBDB-T    | IDT2-IC      | 8.18 | 10.1016/j.orgel.2021.106329    |
| 734 | PBBSe-H   | Y6           | 8.17 | 10.1021/acs.macromol.0c00405   |
| 735 | PTB7-Th   | SSBR         | 8.16 | 10.1016/j.solener.2018.09.077  |
| 736 | PBTA-PS   | 6TIC         | 8.15 | 10.1002/adfm.201903596         |
| 737 | PDCBT     | ITIC-Th1     | 8.14 | 10.1021/acs.macromol.9b00793   |
| 738 | PBDB-T    | IDT-4CN      | 8.13 | 10.1021/acs.chemmater.8b02276  |
| 739 | DRCN5T    | F-1CI        | 8.12 | 10.1002/aenm.201802021         |
| 740 | PBDB-T    | PY5-BT       | 8.12 | 10.1021/acs.chemmater.1c02302  |

|     |            |                |      |                                |
|-----|------------|----------------|------|--------------------------------|
| 741 | PBDB-T     | BDCPDT-FIC     | 8.12 | 10.1021/acsenergylett.8b00563  |
| 742 | PBDB-T     | NTIC-F         | 8.1  | 10.1039/C7TA05809H             |
| 743 | PFBZ       | N2200          | 8.1  | 10.1039/C8TA05376F             |
| 744 | PBDB-T     | O-IDTBR        | 8.09 | 10.1021/acsomega.8b01925       |
| 745 | PBDB-TF    | PF2-DTGe       | 8.09 | 10.1016/j.joule.2020.01.014    |
| 746 | PBDB-TF    | M1             | 8.06 | 10.1039/D0TA09351C             |
| 747 | J91        | IT-4F          | 8.04 | 10.1002/adfm.201808828         |
| 748 | J71        | IDTT-OBH       | 8.02 | 10.1039/C8TA00764K             |
| 749 | PBDB-T     | OCH3-2F        | 8.01 | 10.1021/acsami.1c09597         |
| 750 | DRCN5T     | IDIC8-H        | 8    | 10.1021/acsaem.8b00205         |
| 751 | PBDB-T     | PFBDT-IDTIC    | 8    | 10.1021/acsenergylett.8b02114  |
| 752 | PTB7-Th    | DICTF          | 7.93 | 10.1039/C6TA04358E             |
| 753 | PBDB-T-2Cl | DTSiC-IC       | 7.92 | 10.1021/acsami.1c06360         |
| 754 | PBT1-C     | TPPTTT-IC      | 7.91 | 10.1002/solr.201800246         |
| 755 | P-P        | m-ITIC         | 8.28 | 10.1021/acsami.1c00327         |
| 756 | PBDB-T     | IT-OM-4        | 7.9  | 10.1002/aenm.201700183         |
| 757 | PBDB-T     | QOC6-4H        | 7.9  | 10.1021/acsami.1c11412         |
| 758 | P_suman    | Icz-Rd2        | 7.88 | 10.1039/C8TC05318A             |
| 759 | PTFB-P     | ITIC           | 7.85 | 10.1038/ncomms13094            |
| 760 | J51        | IDTIDSe-T-IC   | 7.84 | 10.1016/j.nanoen.2016.07.019   |
| 761 | PBDB-TF    | PF3-DTC        | 7.83 | 10.1002/solr.202000142         |
| 762 | PBDB-TF    | IDF-4F         | 7.81 | 10.1021/acsaem.0c01247         |
| 763 | PfBT4T-2DT | FBR            | 7.8  | 10.1039/C6EE02598F             |
| 764 | PBDB-T     | IT-OH          | 7.8  | 10.1002/aenm.201903650         |
| 765 | PBDB-TF    | IDF-IC         | 7.8  | 10.1021/acsaem.0c01247         |
| 766 | PBDB-TF    | PD-dIDTC6      | 7.78 | 10.1016/j.synthmet.2021.116838 |
| 767 | PTQ10      | BOC-4F         | 7.76 | 10.1002/solr.202000421         |
| 768 | PBDB-TF    | TPQx-4F        | 7.75 | 10.1039/D0QM00034E             |
| 769 | P2_yang    | IDIC           | 7.75 | 10.1021/acsami.8b04432         |
| 770 | SM-Cl      | IDIC           | 7.73 | 10.1021/acsami.9b16900         |
| 771 | PBDB-T     | Ph-DTDP-IC     | 7.73 | 10.1002/adfm.201705927         |
| 772 | P3HT       | JC14           | 7.72 | 10.1039/D0TA11306A             |
| 773 | FTAZ       | INIC           | 7.7  | 10.1021/jacs.6b12755           |
| 774 | J100       | IT-4F          | 7.7  | 10.1039/D0TC03095C             |
| 775 | PBDB-T     | PTIC           | 7.66 | 10.1002/cssc.201701917         |
| 776 | P3HT       | N10            | 7.65 | 10.1039/C8CC01779D             |
| 777 | PE31       | Y6             | 7.62 | 10.1021/acs.macromol.9b01233   |
| 778 | PBT1Cl-Bz  | IT-4F          | 7.6  | 10.1021/acsaem.8b01447         |
| 779 | J52-Cl     | TPD3           | 7.58 | 10.1021/acs.jpcc.0c02111       |
| 780 | P3HT       | NDICz-6        | 7.58 | 10.1016/j.dyepig.2019.107677   |
| 781 | PBTCl      | ITIC           | 7.57 | 10.1021/acsenergylett.7b00551  |
| 782 | PBDB-T     | IDT-3EsT-2IC2F | 7.54 | 10.1021/acsaem.1c02403         |
| 783 | PTB7-Th    | DTC-F-F        | 7.53 | 10.1016/j.orgel.2020.106026    |
| 784 | PBDB-T     | BZIC-2Br       | 7.51 | 10.1039/D1RA01348C             |

|     |                     |                      |      |                                |
|-----|---------------------|----------------------|------|--------------------------------|
| 785 | PfBTAZ              | O-IDTBR              | 7.5  | 10.1002/aenm.201702427         |
| 786 | PM6                 | SeTIC                | 7.46 | 10.1021/acseenergylett.8b01808 |
| 787 | FTAZ                | IHIC2                | 7.45 | 10.1002/adma.201704713         |
| 788 | PTzBI               | IFBR-p               | 7.44 | 10.1021/acssami.7b12902        |
| 789 | PBDB-T              | IDT-3EsT             | 7.43 | 10.1021/acsaem.1c02403         |
| 790 | PE32                | BTA5                 | 7.4  | 10.1021/acssami.1c03757        |
| 791 | PBDB-T              | IDTA                 | 7.4  | 10.1039/C9TA11752K             |
| 792 | PBDB-TF             | IDTI                 | 7.4  | 10.1002/adma.201704051         |
| 793 | PBDB-T              | IDT-T-N              | 7.4  | 10.1039/C7TA06631G             |
| 794 | T-EHPPD-T-<br>EHBDT | ITIC-F               | 7.39 | 10.1039/D0NJ04573J             |
| 795 | 2D-PBTC12           | ITIC                 | 7.38 | 10.1039/C7TA09837E             |
| 796 | PBDB-T              | i-cc23               | 7.34 | 10.1021/acssami.0c03842        |
| 797 | PTB7                | SFBRCN               | 7.34 | 10.1002/adma.201606054         |
| 798 | PTB7-Th             | FITP                 | 7.33 | 10.1039/C6TA07368A             |
| 799 | PE32                | Y6                   | 7.31 | 10.1021/acs.macromol.9b01233   |
| 800 | PBDB-T              | NCIC                 | 7.31 | 10.1021/acs.chemmater.8b01089  |
| 801 | PTB7-Th             | IEICO                | 7.3  | 10.1016/j.orgel.2018.10.026    |
| 802 | PffT2-FTAZ-<br>2DT  | IEIC                 | 7.3  | 10.1002/adma.201502775         |
| 803 | PBDB-T              | IEIC                 | 7.3  | 10.1021/acssami.9b10243        |
| 804 | P2F-EHp             | ITIC                 | 7.28 | 10.1038/s41560-018-0263-4      |
| 805 | PBDB-T              | FDTBT-IDTT-<br>FINCN | 7.27 | 10.1021/acssami.9b15247        |
| 806 | PDCBT-Cl            | ITIC                 | 7.25 | 10.1016/j.joule.2020.04.014    |
| 807 | J52-Cl              | BTA13                | 7.16 | 10.1016/j.orgel.2021.106195    |
| 808 | PBT-TTz             | ITIC                 | 7.16 | 10.1039/C6TA03288E             |
| 809 | J52                 | Y6                   | 7.15 | 10.1021/acsmacrolett.9b00704   |
| 810 | PBDB-T              | IDBDT-T              | 7.14 | 10.1016/j.synthmet.2021.116922 |
| 811 | PBDB-TF             | PIDIC2T2Cl           | 7.11 | 10.1021/acssami.0c08442        |
| 812 | PBDB-TF             | Y1                   | 7.1  | 10.1002/adma.201904215         |
| 813 | PBDB-TF             | PI-4F                | 7.1  | 10.1002/cjoc.202100323         |
| 814 | BDT3TR              | O-IDTBR              | 7.09 | 10.1039/C6TA06367E             |
| 815 | PBDTNO-BDD          | ITIC                 | 7.05 | 10.1002/aenm.201702489         |
| 816 | PBDB-TF             | PTB4F                | 7.04 | 10.1002/anie.202101867         |
| 817 | PM6                 | CZTT-IC              | 7.02 | 10.1039/c9ta08573d             |
| 818 | PBDB-T              | BT-BIC               | 7    | 10.1021/jacs.1c00211           |
| 819 | J61                 | IDT-IC               | 6.95 | 10.1039/C7TA07049G             |
| 820 | PDCBT-2Cl           | ITIC-Th1             | 6.94 | 10.1021/acs.macromol.9b00793   |
| 821 | P1_mishra           | DCI-2                | 6.94 | 10.1039/C7TA04703G             |
| 822 | PTB7-Th             | IHIC-N               | 6.91 | 10.1021/acs.chemmater.7b04499  |
| 823 | PTQ10               | Y1-4F                | 6.9  | 10.1021/acs.nanolett.0c05045   |
| 824 | PPDT2FBT            | BTDT2R               | 6.9  | 10.1021/acssami.9b09256        |
| 825 | PBDB-T              | DC6-IC               | 6.87 | 10.1038/s41467-019-11001-6     |



|     |                   |           |      |                                |
|-----|-------------------|-----------|------|--------------------------------|
| 826 | PTB7-Th           | NFBBDT    | 6.74 | 10.1002/adma.201707508         |
| 827 | PBQ-0F            | ITIC      | 6.68 | 10.1002/adma.201604241         |
| 828 | PBDB-T            | SCH3-2F   | 6.67 | 10.1021/acsami.1c09597         |
| 829 | PBDB-TF           | N65-IC    | 6.67 | 10.1021/acsaem.0c00689         |
| 830 | PBDB-T            | IBR       | 6.66 | 10.1016/j.dyepig.2019.02.017   |
| 831 | PBDB-T            | YITI-4F   | 6.64 | 10.1039/C8TA04405H             |
| 832 | DRBDT-TVTV        | IDIC      | 6.63 | 10.1021/acsami.7b17961         |
| 833 | PBDB-TF           | PTICO     | 6.62 | 10.1038/s41467-019-10098-z     |
| 834 | NDTR              | IDIC      | 6.6  | 10.1039/C7QM00397H             |
| 835 | PDCBT-2F          | IT-M      | 6.6  | 10.1039/C6TA07672F             |
| 836 | PTB7-Th           | IDT-T-N   | 6.6  | 10.1039/C7TA06631G             |
| 837 | PffBT4T-2DT       | ITIC-Th   | 6.6  | 10.1002/aenm.201701674         |
| 838 | PTB7-Th           | AOT3      | 6.59 | 10.1021/acsaem.0c02719         |
| 839 | PTB7-Th           | PhITBD    | 6.57 | 10.1039/C7TC00706J             |
| 840 | P3HT              | BTA43     | 6.56 | 10.1021/acsami.9b16662         |
| 841 | J71               | TTIDIC    | 6.54 | 10.1021/acsapm.0c00748         |
| 842 | PvBDT-F           | Y6-T      | 6.52 | 10.1016/j.jpowsour.2021.229961 |
| 843 | DRBDT-STVT        | IDIC      | 6.51 | 10.1021/acsami.7b17961         |
| 844 | PBDTTS-<br>TTffBT | di-PBI    | 6.51 | 10.1002/macp.201600459         |
| 845 | J52               | IEICO     | 6.5  | 10.1002/adma.201700437         |
| 846 | PTB7-Th           | IDTIDT-IC | 6.48 | 10.1039/C6EE00315J             |
| 847 | PBDB-T            | IDTT2OT   | 6.46 | 10.1016/j.synthmet.2021.116880 |
| 848 | PTB7-Th           | BPTCN     | 6.42 | 10.1039/D0TC00225A             |
| 849 | PBDB-T            | IDT-2B    | 6.42 | 10.1002/adma.201703527         |
| 850 | PBDB-TF           | ID-4F     | 6.4  | 10.1016/j.nanoen.2020.104861   |
| 851 | PBZ               | IT-4F     | 6.4  | 10.1039/C8TA10662B             |
| 852 | P3HT              | ORCN      | 6.4  | 10.1002/aenm.201803012         |
| 853 | PTPDBDT           | H-ITIC    | 6.4  | 10.1039/C7QM00025A             |
| 854 | P3HT              | Qx3b      | 6.37 | 10.1007/s11426-019-9618-7      |
| 855 | DR3TBDTT          | O-IDTBR   | 6.36 | 10.1039/C8TA04665D             |
| 856 | PBTA-BO           | IffBR     | 6.34 | 10.1021/acs.chemmater.7b02228  |
| 857 | P3HT              | BTA53     | 6.31 | 10.1021/acsami.9b16662         |
| 858 | PTB7-Th           | IEIC      | 6.31 | 10.1039/C4EE03424D             |
| 859 | DRCN5T            | IDIC8-M   | 6.31 | 10.1021/acsaem.8b00205         |
| 860 | PBDB-T            | IT-OM-1   | 6.3  | 10.1002/aenm.201700183         |
| 861 | HFQx-T            | BZIC      | 6.3  | 10.1021/acsami.7b10995         |
| 862 | J71               | TTz2      | 6.3  | 10.1039/C8TA09370A             |
| 863 | P3HT              | IDTBR     | 6.3  | 10.1038/nmat4797               |
| 864 | P3HT              | O-IDTBR   | 6.3  | 10.1038/ncomms11585            |
| 865 | PTB7-Th           | N2200     | 6.26 | 10.1002/solr.202000148         |
| 866 | P3HT              | JC2       | 6.24 | 10.1021/acsami.9b08007         |
| 867 | PDBT-2Cl          | IT-4F     | 6.2  | 10.1039/C9QM00212J             |
| 868 | POPB              | IT-4F     | 6.2  | 10.1039/C8TA11006A             |

|     |            |                |      |                                  |
|-----|------------|----------------|------|----------------------------------|
| 869 | PTB7-Th    | IDTT-CT        | 6.13 | 10.1039/D0TA09924D               |
| 870 | P5T        | eC9            | 6.13 | 10.1021/acsmaterialslett.1c00328 |
| 871 | J52-2F     | CRIC           | 6.12 | 10.1016/j.dyepig.2019.108012     |
| 872 | PTB7-Th    | IDTCR          | 6.1  | 10.1039/C7TC04669C               |
| 873 | P3HT       | BT2b           | 6.08 | 10.1002/solr.201700166           |
| 874 | Qx-8F      | Y6             | 6.07 | 10.1039/D1TA01500A               |
| 875 | BDTS-2DPP  | IEIC           | 6.03 | 10.1039/C5TA10424F               |
| 876 | P3HT       | EH-IDTBR       | 6    | 10.1038/ncomms11585              |
| 877 | PTB7-Th    | DTCC-IC        | 6    | 10.1039/C7TA01143A               |
| 878 | PBFSF      | N2200          | 6    | 10.1002/aenm.201703291           |
| 879 | J52        | m-ITIC         | 5.98 | 10.1002/adma.201703344           |
| 880 | PBDB-T     | DICTF          | 5.93 | 10.1002/adma.201604964           |
| 881 | PBDB-TF    | TfIF-IC        | 5.9  | 10.1002/aenm.201803657           |
| 882 | 3BDT-4     | Y6             | 5.82 | 10.1039/D1TA01680F               |
| 883 | PBZ1       | ITIC           | 5.8  | 10.1039/C7TA11059F               |
| 884 | PTB7-Th    | A1             | 5.79 | 10.1039/C8TA00704G               |
| 885 | J52-Cl     | BTA7           | 5.78 | 10.1016/j.orgel.2021.106195      |
| 886 | PTQ7       | Y6             | 5.75 | 10.1002/adma.201905480           |
| 887 | PTIBT      | ITIC           | 5.72 | 10.1002/ajoc.202000172           |
| 888 | P3HT       | BTA3           | 5.64 | 10.1021/acсами.8b10312           |
| 889 | J52-F      | BTA4           | 5.61 | 10.1007/s11426-020-9840-x        |
| 890 | J52-2F     | CRIC-4F        | 5.61 | 10.1016/j.dyepig.2019.108012     |
| 891 | PTB7-Th    | F5IC           | 5.61 | 10.1021/jacs.9b08988             |
| 892 | FTAZ       | F5IC           | 5.6  | 10.1021/acs.chemmater.8b02222    |
| 893 | PTB7-Th    | CDTBM          | 5.6  | 10.1021/acsenergylett.8b00045    |
| 894 | PBDB-T     | DBTD-4F        | 5.55 | 10.1016/j.cej.2021.128770        |
| 895 | J52        | ITIC           | 5.51 | 1021/jacs.6b01744                |
| 896 | H12        | IDIC           | 5.51 | 10.1021/jacs.6b12826             |
| 897 | PTB7-Th    | IDT-N          | 5.5  | 10.1039/C7TA06631G               |
| 898 | DRCN5T     | F-0Cl          | 5.49 | 10.1002/aenm.201802021           |
| 899 | PBDB-T     | IDT-4EsT-2IC2F | 5.45 | 10.1021/acsaem.1c02403           |
| 900 | P3HT       | H1             | 5.42 | 10.1039/c7qm00084g               |
| 901 | PBDB-T-2Cl | ICPDT-4F       | 5.39 | 10.1021/acs.jpcc.0c09663         |
| 902 | P3HT       | I-IDTBTRh      | 5.38 | 10.1039/C8TC04608E               |
| 903 | PBDB-T     | PIDIC2T2Cl     | 5.34 | 10.1021/acсами.0c08442           |
| 904 | P3HT       | BTA103         | 5.31 | 10.1039/C8TC03963A               |
| 905 | PBDTT      | IDIC           | 5.3  | 10.1002/marc.201800660           |
| 906 | PTB7-Th    | CBM            | 5.3  | 10.1021/acs.chemmater.6b00131    |
| 907 | PBDTT-TT-F | P(NDI2OD-T2)   | 5.28 | 10.1002/adma.201501214           |
| 908 | PTzBI      | IFBR-d         | 5.28 | 10.1021/acсами.7b12902           |
| 909 | P3HT       | BTA1           | 5.24 | 10.1021/acsmacrolett.7b00097     |
| 910 | J52-Cl     | BTA17          | 5.18 | 10.1016/j.orgel.2021.106195      |
| 911 | PBDB-T     | Py-2H          | 5.13 | 10.1016/j.synthmet.2021.116904   |
| 912 | P3HT       | IDT-2BR        | 5.12 | 10.1039/C5EE02477C               |

|     |             |                   |      |                               |
|-----|-------------|-------------------|------|-------------------------------|
| 913 | P3HT        | TPBT-RCN          | 5.11 | 10.1021/acs.jpcc.0c07162      |
| 914 | PTB7-Th     | FBM               | 5.1  | 10.1021/acs.chemmater.6b00131 |
| 915 | P3HT        | BTDT2R            | 5.09 | 10.1021/acsami.9b09256        |
| 916 | PBDB-TF     | Y-T               | 5.06 | 10.1016/j.nanoen.2021.106538  |
| 917 | P3HT        | P-IDTzR           | 5.01 | 10.1039/C8QM00461G            |
| 918 | PTB7        | DTDFBT(TDPP)<br>2 | 5    | 10.1021/acs.chemmater.5b02480 |
| 919 | PBDB-TF     | PIDIC2T2F         | 4.96 | 10.1021/acsami.0c08442        |
| 920 | PBDTTT-E-T  | IEIC              | 4.9  | 10.1002/adma.201602642        |
| 921 | P1_mishra   | PY-1              | 4.89 | 10.1039/C7TA04703G            |
| 922 | PBDB-TF     | PIDIC2T           | 4.89 | 10.1021/acsami.0c08442        |
| 923 | P1_yang     | IDIC              | 4.86 | 10.1021/acsami.8b04432        |
| 924 | P3HT        | Qx1b              | 4.81 | 10.1021/acsami.8b00216        |
| 925 | PBDB-T      | NITV              | 4.8  | 10.1021/acs.chemmater.9b03329 |
| 926 | J50         | ITIC              | 4.8  | 10.1002/adma.201601595        |
| 927 | P3HT        | SF-OR             | 4.7  | 10.1021/acs.chemmater.6b03323 |
| 928 | PTB7-Th     | IDT-CT            | 4.62 | 10.1039/D0TA09924D            |
| 929 | P3HT        | N3_srivani        | 4.62 | 10.1039/C7CC03122J            |
| 930 | P3HT        | BTA2              | 4.5  | 10.1021/acsmacrolett.7b00097  |
| 931 | P3HT        | IDFBR             | 4.5  | 10.1038/nmat4797              |
| 932 | PBT2Clas-Bz | IT-4F             | 4.43 | 10.1021/acsaem.8b01447        |
| 933 | PDTH-TZNT   | IT-M              | 4.42 | 10.1016/j.nanoen.2018.08.059  |
| 934 | PBDB-TF     | di-PDI-2F         | 4.32 | 10.1002/ajoc.202100585        |
| 935 | PBDB-T      | INPIC             | 4.31 | 10.1002/adma.201707150        |
| 936 | PTN2        | Y12               | 4.3  | 10.1021/acsami.3c14494        |
| 937 | PBDB-TF     | BTP-M             | 4.26 | 10.1039/C9EE03710A            |
| 938 | HTAZ        | ITIC              | 4.26 | 10.1039/C7TA07882J            |
| 939 | PBDB-TF     | M8                | 4.21 | 10.1002/anie.202007907        |
| 940 | FTAZ        | ITBC              | 4.17 | 10.1021/acsaem.8b01576        |
| 941 | P3HT        | FBR               | 4.11 | 10.1021/ja5110602             |
| 942 | PBDB-TF     | PTICH             | 4.08 | 10.1038/s41467-019-10098-z    |
| 943 | PTB7-Th     | IDT-T             | 4.08 | 10.1039/C7TA05774A            |
| 944 | PBDB-T      | PIDIC2T2F         | 4.07 | 10.1021/acsami.0c08442        |
| 945 | PTB7-Th     | AOT2              | 4.06 | 10.1021/acsaem.0c02719        |
| 946 | P3HT        | Qx1               | 4.03 | 10.1021/acsami.8b00216        |
| 947 | PBDB-T      | Ph-DTDP-TTIC      | 4.02 | 10.1002/adfm.201705927        |
| 948 | P3HT        | SF-HR             | 4.01 | 10.1039/C9RA03188J            |
| 949 | PTzBI-oF    | PY5T              | 4.01 | 10.1021/acsenergylett.0c02053 |
| 950 | P(T4-TPD-M) | ITIC              | 4    | 10.1016/j.orgel.2019.02.020   |
| 951 | BDT-2DPP    | IEIC              | 4    | 10.1039/C5TA10424F            |
| 952 | PBDT-TS1    | SSBR              | 3.99 | 10.1016/j.solener.2018.09.077 |
| 953 | PBDB-TF     | DTP-out-F         | 3.97 | 10.1021/acsami.1c06299        |
| 954 | PTB7-Th     | IDT-2BM           | 3.97 | 10.1039/C7TC00706J            |
| 955 | PBTA-BO     | IFBR              | 3.85 | 10.1002/aenm.201602127        |

|     |            |                    |      |                                |
|-----|------------|--------------------|------|--------------------------------|
| 956 | PBDB-TF    | IEIC               | 3.8  | 10.1021/acsami.9b10243         |
| 957 | PBDB-T     | BDTS-4Cl           | 3.73 | 10.1021/acs.chemmater.8b04087  |
| 958 | PCE10-2F   | IT-4F              | 3.71 | 10.1039/D0TA11203H             |
| 959 | PTB7-Th    | ITOTIC-2F          | 3.7  | 10.1002/aenm.201801209         |
| 960 | P3HT       | NAI-FN-<br>NAI(BO) | 3.6  | 10.1021/acsami.6b16395         |
| 961 | P3HT       | Y5                 | 3.6  | 10.1021/acs.jpcc.0c07162       |
| 962 | P3HT       | IDTIDT-IC          | 3.58 | 10.1016/j.jpowsour.2017.08.061 |
| 963 | PTB7-Th    | IDTT(TCV)2         | 3.57 | 10.1021/acsami.6b15707         |
| 964 | P3HT       | BTA101             | 3.55 | 10.1039/C8TC03963A             |
| 965 | PBDB-TF    | BDTN-Th            | 3.53 | 10.1021/acsami.9b22093         |
| 966 | P3HT       | H-IDTzR            | 3.53 | 10.1039/C8QM00461G             |
| 967 | PTB7-Th    | IDT(DCV)2          | 3.53 | 10.1021/acsami.6b15707         |
| 968 | P3HT       | N4                 | 3.52 | 10.1039/C7CC03122J             |
| 969 | PBDB-T     | SSBR               | 3.44 | 10.1016/j.solener.2018.09.077  |
| 970 | PBDB-T     | IEICO              | 3.38 | 10.1021/acsami.9b03499         |
| 971 | P3HT       | Qx3                | 3.37 | 10.1007/s11426-019-9618-7      |
| 972 | PBDTTT-E-T | SSBR               | 3.36 | 10.1016/j.solener.2018.09.077  |
| 973 | J61        | SSBR               | 3.33 | 10.1016/j.solener.2018.09.077  |
| 974 | PTB7-Th    | AOT1               | 3.31 | 10.1021/acsam.0c02719          |
| 975 | PTB7-Th    | IDT-IC             | 3.2  | 10.1039/C6EE00315J             |
| 976 | PBDB-TF    | di-PDI             | 3.18 | 10.1002/ajoc.202100585         |
| 977 | P3HT       | PBI                | 3.17 | 10.1016/j.orgel.2012.07.002    |
| 978 | P3HT       | F(DPP)2B2          | 3.17 | 10.1039/C4TA06035K             |
| 979 | P3HT       | FNTz-Teh-FA        | 3.12 | 10.1038/s41427-018-0088-4      |
| 980 | PTB7-Th    | DTPC-IC            | 3.12 | 10.1021/jacs.7b13239           |
| 981 | PTBB-o     | ITCPTC             | 3.09 | 10.1002/aenm.201802686         |
| 982 | P3HT       | Flu-RH             | 3.08 | 10.1039/C4CC01695E             |
| 983 | PTB7       | DTBT(TDPP)2        | 3.03 | 10.1021/acs.chemmater.5b02480  |
| 984 | PBDB-T     | BDIC2F             | 3.01 | 10.1002/cssc.202100746         |
| 985 | PBBSB      | N2200              | 3    | 10.1002/aenm.201703291         |
| 986 | PBDB-T     | PIDIC2T            | 2.97 | 10.1021/acsami.0c08442         |
| 987 | P4_yang    | IDIC               | 2.93 | 10.1021/acsami.8b04432         |
| 988 | P3HT       | IDTT-CR            | 2.86 | 10.1039/D0TA09924D             |
| 989 | PTB7-Th    | IDT(TCV)2          | 2.84 | 10.1021/acsami.6b15707         |
| 990 | P3HT       | NTz-Np             | 2.81 | 10.1002/adfm.201504153         |
| 991 | PBDB-T-2Cl | BTCIC              | 2.8  | 10.1021/acsami.0c01850         |
| 992 | P3HT       | JC1                | 2.8  | 10.1021/acsami.9b08007         |
| 993 | PBDB-TF    | A702               | 2.73 | 10.1021/acsam.1c00584          |
| 994 | PTB7-Th    | DTC-F-C            | 2.7  | 10.1016/j.orgel.2020.106026    |
| 995 | P3HT       | ERCN               | 2.64 | 10.1002/aenm.201803012         |
| 996 | PBDB-T     | m-4TBC-2F          | 2.63 | 10.1002/anie.202010856         |
| 997 | P3HT       | IDT-2PDI           | 2.61 | 10.1002/aenm.201400420         |
| 998 | P3HT       | Cz-RH              | 2.56 | 10.1039/C4CC01695E             |

|      |             |                |      |                                |
|------|-------------|----------------|------|--------------------------------|
| 999  | P3HT        | BT3            | 2.55 | 10.1021/acsami.8b10312         |
| 1000 | P3HT        | PI-BT          | 2.54 | 10.1021/cm203111k              |
| 1001 | P3HT        | FEHIDT         | 2.43 | 10.1039/c3cc42293c             |
| 1002 | P3HT        | Y6             | 2.41 | 10.1021/acs.jpcc.0c07162       |
| 1003 | P3HT        | Th-PhCHO       | 2.4  | 10.1039/c3cc47289b             |
| 1004 | P(T4-iI-M)  | ITIC           | 2.4  | 10.1016/j.orgel.2019.02.020    |
| 1005 | PCE10-SF    | IT-4F          | 2.4  | 10.1039/D0TA11203H             |
| 1006 | P3HT        | F8-DPPTCN      | 2.37 | 10.1039/C6TA00056H             |
| 1007 | P3HT        | AFI3           | 2.37 | 10.1002/ajoc.201700203         |
| 1008 | J46         | ITIC           | 2.34 | 10.1016/j.orgel.2018.03.028    |
| 1009 | P3HT        | PMI-F-PMI      | 2.3  | 10.1016/j.orgel.2015.03.017    |
| 1010 | PBDB-T      | IDT-BC6        | 2.3  | 10.1021/jacs.7b00566           |
| 1011 | P3HT        | N7             | 2.3  | 10.1039/C6RA01558A             |
| 1012 | P(T4-DPP-M) | ITIC           | 2.2  | 10.1016/j.orgel.2019.02.020    |
| 1013 | PBDB-T      | IDT-PDOT       | 2.18 | 10.1039/C8TA08410F             |
| 1014 | P3HT        | BIBT-NI        | 2.11 | 10.1039/C8NJ04896G             |
| 1015 | PTB7-Th     | BTP-3V         | 2.06 | 10.1039/D0MA01017K             |
| 1016 | P3HT        | DBS-2DPP       | 2.05 | 10.1002/aenm.201200911         |
| 1017 | PffBT-DPP   | MeIC           | 2    | 10.1021/acs.chemmater.0c02133  |
| 1018 | P3HT        | FFI-1          | 1.86 | 10.1002/adma.201103927         |
| 1019 | PBDB-T      | IDBDT-O        | 1.83 | 10.1016/j.synthmet.2021.116922 |
| 1020 | PBDB-T      | CPIC-3         | 1.71 | 10.1002/asia.202101147         |
| 1021 | P3HT        | B-PDI-B        | 1.66 | 10.1021/jp5093674              |
| 1022 | PBDB-TF     | A4T-21         | 1.57 | 10.1038/s41467-021-25394-w     |
| 1023 | P3HT        | IDT-R          | 1.57 | 10.1039/D0TA09924D             |
| 1024 | P3HT        | BisPDI-T-di-EG | 1.54 | 10.1039/c3cp51475g             |
| 1025 | P3HT        | BTz-Np         | 1.53 | 10.1002/adfm.201504153         |
| 1026 | PBB         | Y6             | 1.51 | 10.1021/acs.macromol.0c00405   |
| 1027 | P3HT        | NDI-3TH        | 1.5  | 10.1002/aenm.201100285         |
| 1028 | P3HT        | ITIC           | 1.5  | 10.1039/c9ta07361b             |
| 1029 | PBDTTPD     | DTI            | 1.47 | 10.1002/aenm.201301007         |
| 1030 | P3HT        | DTI            | 1.45 | 10.1002/aenm.201301007         |
| 1031 | P3HT        | YF25           | 1.43 | 10.1002/aenm.201200372         |
| 1032 | PDTsBT      | DTI            | 1.32 | 10.1002/aenm.201301007         |
| 1033 | P3HT        | DPP-FN-DPP     | 1.2  | 10.1039/C6NJ03938C             |
| 1034 | P3HT        | N6b            | 1.16 | 10.1039/C4RA09668A             |
| 1035 | PIDT-DTN    | ITIC           | 1.1  | 10.1021/acs.macromol.6b02733   |
| 1036 | P2F-EHp     | BTPT-4F        | 1.09 | 10.1007/s11426-019-9457-5      |
| 1037 | P3HT        | NTz-Teh-FA     | 1.06 | 10.1038/s41427-018-0088-4      |
| 1038 | P3HT        | BTA100         | 1.04 | 10.1039/C8TC03963A             |
| 1039 | PBDB-T-4Cl  | ICPDT-4F       | 1.04 | 10.1021/acs.jpcc.0c09663       |
| 1040 | PTB7-Th     | BTP-4V         | 1.03 | 10.1039/D0MA01017K             |
| 1041 | P3HT        | BTP-4Cl        | 1.01 | 10.1039/D0EE01763A             |
| 1042 | P3HT        | IDT-CR         | 0.99 | 10.1039/D0TA09924D             |

|      |             |         |      |                               |
|------|-------------|---------|------|-------------------------------|
| 1043 | PTQ8        | Y6      | 0.9  | 10.1002/adma.201905480        |
| 1044 | PCDTBT      | DTI     | 0.75 | 10.1002/aenm.201301007        |
| 1045 | P3HT        | K12     | 0.73 | 10.1002/aenm.201000024        |
| 1046 | PTB7-Th     | DTC-T-C | 0.71 | 10.1016/j.orgel.2020.106026   |
| 1047 | PBDB-T      | CPIC-1  | 0.63 | 10.1002/asia.202101147        |
| 1048 | J52-Cl      | BTA1    | 0.6  | 10.1016/j.orgel.2021.106195   |
| 1049 | FTAZ        | IDTCF   | 0.59 | 10.1039/C9QM00314B            |
| 1050 | PDCBT-Cl    | Y6      | 0.48 | 10.1016/j.joule.2020.04.014   |
| 1051 | PBDD4T      | ITIC    | 0.45 | 10.1021/acs.macromol.6b00248  |
| 1052 | P3HT        | IDTT-R  | 0.43 | 10.1039/D0TA09924D            |
| 1053 | P3HT        | SSBR    | 0.26 | 10.1016/j.solener.2018.09.077 |
| 1054 | PCl(3)BDB-T | IT-4F   | 0.18 | 10.1002/anie.201807865        |
| 1055 | J52-Cl      | BTA11   | 0.13 | 10.1016/j.orgel.2021.106195   |
| 1056 | PTB7-Th     | SF-HR   | 0.13 | 10.1039/C9RA03188J            |
| 1057 | PTB7-Th     | SSTI    | 0.05 | 10.1002/solr.202000286        |
| 1058 | P3HT        | Qx3c    | 0.03 | 10.1007/s11426-019-9618-7     |
| 1059 | PB2T        | IT-M    | 0.01 | 10.1039/C6EE03489F            |
| 1060 | PB2T        | ITIC    | 0.01 | 10.1002/adfm.201706517        |

---

Table S7. Top 2000 D/A combinations from virtual screening.

| Reported Donor | Reported Acceptor | Predicted PCE(%) |       |       |       |             |       |       |       |
|----------------|-------------------|------------------|-------|-------|-------|-------------|-------|-------|-------|
|                |                   | GCN              | GAT   | GIN   | MPNN  | GCN_<br>EWN | EGAT  | GINE  | Mean  |
| PBDB-T-SF      | S-WSeSe-Cl        | 18.73            | 17.02 | 16.08 | 17.76 | 17.93       | 17.08 | 17.24 | 17.43 |
| PBDB-T-SF      | BTP-S2            | 18.68            | 16.22 | 16.53 | 17.79 | 17.98       | 17.01 | 16.53 | 17.37 |
| PDBT-F         | CH1007            | 18.27            | 17.59 | 15.98 | 16.73 | 18.49       | 17.09 | 17.84 | 17.36 |
| PDBT-F         | S-WSeSe-Cl        | 18.14            | 17.47 | 16.00 | 17.44 | 17.85       | 17.23 | 17.40 | 17.35 |
| PBN-S          | S-WSeSe-Cl        | 18.24            | 17.11 | 16.04 | 17.61 | 17.52       | 17.44 | 17.36 | 17.33 |
| PDBT-F         | BTP-S2            | 18.43            | 16.45 | 16.47 | 17.43 | 17.88       | 17.27 | 16.59 | 17.32 |
| PBDB-T-SF      | BTP-S1            | 18.69            | 16.42 | 16.47 | 16.96 | 18.43       | 16.86 | 16.42 | 17.31 |
| PDTB-EF-T      | S-WSeSe-Cl        | 18.58            | 16.94 | 15.78 | 17.09 | 17.91       | 17.45 | 17.12 | 17.29 |
| PBQx-TF        | S-WSeSe-Cl        | 17.57            | 19.04 | 14.84 | 18.62 | 17.22       | 16.45 | 18.56 | 17.29 |
| PBDB-T-SF      | CH1007            | 17.91            | 17.36 | 15.94 | 17.06 | 18.62       | 16.82 | 17.42 | 17.28 |
| PDBT-F         | BTP-S1            | 18.53            | 16.72 | 16.46 | 16.55 | 18.27       | 17.15 | 16.72 | 17.28 |
| PBN-S          | CH1007            | 18.25            | 17.29 | 15.52 | 16.85 | 18.35       | 17.33 | 17.42 | 17.27 |
| PBDB-T-SF      | A-WSeSe-Cl        | 18.33            | 16.66 | 15.83 | 17.61 | 17.95       | 17.19 | 16.75 | 17.26 |
| PBN-S          | BTP-S2            | 18.43            | 16.25 | 16.45 | 17.62 | 17.53       | 17.24 | 16.64 | 17.25 |
| PBT-SF         | S-WSeSe-Cl        | 18.25            | 16.86 | 15.88 | 17.42 | 17.76       | 17.30 | 16.69 | 17.25 |
| PDTB-EF-T      | BTP-S2            | 18.60            | 16.34 | 16.16 | 17.11 | 17.89       | 17.25 | 16.31 | 17.23 |
| D18            | S-WSeSe-Cl        | 17.47            | 17.48 | 16.16 | 17.40 | 17.78       | 16.99 | 18.50 | 17.21 |
| PBT-SF         | BTP-S2            | 18.34            | 16.16 | 16.37 | 17.48 | 17.75       | 17.13 | 15.86 | 17.21 |
| PDBT-F         | A-WSeSe-Cl        | 17.90            | 17.05 | 15.74 | 17.27 | 17.87       | 17.37 | 16.83 | 17.20 |
| PBDB-T-SF      | BTIC-BO-4Br       | 18.89            | 15.90 | 15.66 | 17.77 | 17.99       | 16.94 | 16.55 | 17.19 |
| PBN-S          | A-WSeSe-Cl        | 18.00            | 16.75 | 15.79 | 17.45 | 17.57       | 17.56 | 16.80 | 17.19 |
| PDTB-EF-T      | BTP-S1            | 18.57            | 16.64 | 15.69 | 16.51 | 18.50       | 17.08 | 16.05 | 17.16 |
| PBDB-T-SF      | BTP-ClBr1         | 18.42            | 16.15 | 15.63 | 17.65 | 18.01       | 17.08 | 16.54 | 17.16 |
| PBDB-T-SF      | BTP-ClBr2         | 18.55            | 16.14 | 15.74 | 17.58 | 17.95       | 16.89 | 16.50 | 17.14 |
| PBN-S          | BTP-S1            | 18.49            | 16.35 | 16.01 | 16.89 | 18.02       | 17.09 | 16.51 | 17.14 |
| PDTB-EF-T      | A-WSeSe-Cl        | 18.19            | 16.69 | 15.52 | 16.96 | 17.96       | 17.50 | 16.53 | 17.14 |
| PBCT-2F        | S-WSeSe-Cl        | 18.15            | 17.42 | 16.04 | 16.99 | 16.82       | 17.40 | 18.70 | 17.14 |
| PBQx-TF        | A-WSeSe-Cl        | 17.33            | 18.69 | 14.81 | 18.40 | 17.29       | 16.23 | 18.02 | 17.12 |
| PBCT-2F        | BTP-S2            | 18.43            | 16.69 | 16.47 | 17.03 | 16.84       | 17.21 | 17.90 | 17.11 |
| PBT-SF         | BTP-S1            | 18.13            | 16.27 | 16.40 | 16.55 | 18.32       | 16.98 | 15.52 | 17.11 |
| PBQx-TF        | BTP-ClBr          | 17.53            | 18.40 | 14.96 | 18.51 | 17.27       | 15.95 | 17.56 | 17.10 |
| PDBT-F         | BTIC-BO-4Br       | 18.34            | 16.29 | 15.55 | 17.41 | 17.86       | 17.13 | 16.68 | 17.10 |
| PDTB-EF-T      | CH1007            | 17.74            | 17.19 | 15.12 | 16.38 | 18.91       | 17.23 | 16.33 | 17.09 |
| PBT-SF         | A-WSeSe-Cl        | 17.87            | 16.57 | 15.61 | 17.25 | 17.83       | 17.41 | 16.10 | 17.09 |
| PBN-S          | BTIC-BO-4Br       | 18.46            | 16.03 | 15.63 | 17.68 | 17.55       | 17.17 | 16.64 | 17.09 |
| PBN-S          | BTP-ClBr2         | 18.23            | 16.24 | 15.74 | 17.45 | 17.56       | 17.29 | 16.60 | 17.09 |
| PDBT-F         | BTP-ClBr2         | 18.14            | 16.58 | 15.63 | 17.24 | 17.83       | 17.06 | 16.66 | 17.08 |
| PDBT-F         | BTP-ClBr1         | 17.95            | 16.52 | 15.52 | 17.31 | 17.89       | 17.29 | 16.71 | 17.08 |
| PDTB-EF-T      | BTIC-BO-4Br       | 18.75            | 16.10 | 15.35 | 17.21 | 17.98       | 17.07 | 16.27 | 17.08 |
| PBN-S          | BTP-ClBr1         | 18.06            | 16.24 | 15.64 | 17.53 | 17.59       | 17.37 | 16.63 | 17.07 |
| PBQx-TF        | BTP-ClBr2         | 17.52            | 18.45 | 14.72 | 18.36 | 17.34       | 15.99 | 17.88 | 17.06 |
| PDTB-EF-T      | BTP-ClBr2         | 18.40            | 16.19 | 15.48 | 16.98 | 18.02       | 17.26 | 16.25 | 17.05 |
| PDTB-EF-T      | BTP-ClBr1         | 18.28            | 16.28 | 15.37 | 17.05 | 18.02       | 17.28 | 16.25 | 17.05 |
| D18            | BTP-S2            | 17.60            | 16.74 | 16.43 | 17.42 | 17.76       | 16.30 | 17.69 | 17.04 |

|           |                |       |       |       |       |       |       |       |       |
|-----------|----------------|-------|-------|-------|-------|-------|-------|-------|-------|
| PBT-SF    | BTIC-BO-4Br    | 18.53 | 16.12 | 15.38 | 17.38 | 17.77 | 17.06 | 15.84 | 17.04 |
| PBDB-T-SF | BO-4Cl         | 17.85 | 16.16 | 15.56 | 17.39 | 17.97 | 17.28 | 16.43 | 17.04 |
| D18       | A-WSeSe-Cl     | 17.19 | 17.03 | 15.91 | 17.24 | 17.85 | 16.99 | 17.98 | 17.03 |
| PBDB-TSCl | S-WSeSe-Cl     | 18.34 | 16.58 | 15.83 | 17.64 | 17.02 | 16.71 | 17.08 | 17.02 |
| PBDB-T-SF | BTP-4Cl,eC9    | 17.80 | 16.20 | 15.54 | 17.37 | 17.93 | 17.27 | 16.35 | 17.02 |
| PBDB-T-SF | BTP-eC9        | 17.80 | 16.20 | 15.54 | 17.37 | 17.93 | 17.27 | 16.35 | 17.02 |
| PBQx-TF   | BTP-ClBr1      | 17.34 | 18.49 | 14.51 | 18.50 | 17.31 | 15.95 | 17.92 | 17.02 |
| PDBT-F    | BTP-2F-2Cl,SY2 | 17.92 | 16.75 | 15.55 | 16.09 | 18.22 | 17.53 | 16.45 | 17.01 |
| PBDB-T-SF | BTP-ClBr       | 18.39 | 15.87 | 15.96 | 17.64 | 17.94 | 16.26 | 16.39 | 17.01 |
| PBT-SF    | BTP-ClBr1      | 17.99 | 16.26 | 15.37 | 17.27 | 17.86 | 17.23 | 15.79 | 17.00 |
| PBN-S     | BTP-ClBr       | 18.17 | 15.99 | 15.94 | 17.51 | 17.52 | 16.80 | 16.50 | 16.99 |
| PBN-S     | BO-4Cl         | 17.75 | 16.18 | 15.54 | 17.21 | 17.62 | 17.61 | 16.50 | 16.99 |
| PBN-S     | BTP-2F-2Cl,SY2 | 17.94 | 16.59 | 15.61 | 16.29 | 18.04 | 17.43 | 16.22 | 16.98 |
| PBT-SF    | CH1007         | 17.26 | 16.74 | 15.46 | 16.67 | 18.76 | 17.03 | 15.90 | 16.98 |
| PDTB-EF-T | BTP-ClBr       | 18.27 | 16.02 | 15.68 | 17.05 | 17.95 | 16.91 | 16.18 | 16.98 |
| PBDB-T-SF | BTP-2F-2Cl,SY2 | 17.76 | 16.53 | 15.66 | 16.50 | 18.34 | 17.05 | 16.13 | 16.97 |
| PBT-SF    | BTP-ClBr2      | 18.12 | 16.11 | 15.48 | 17.19 | 17.82 | 17.13 | 15.80 | 16.97 |
| PDBT-F    | BO-4Cl         | 17.67 | 16.31 | 15.47 | 17.03 | 17.88 | 17.47 | 16.58 | 16.97 |
| PDBT-Cl   | S-WSeSe-Cl     | 17.73 | 17.03 | 15.76 | 17.27 | 17.12 | 16.93 | 17.23 | 16.97 |
| PBN-S     | BTP-eC9        | 17.70 | 16.24 | 15.50 | 17.18 | 17.61 | 17.57 | 16.42 | 16.97 |
| PBN-S     | BTP-4Cl,eC9    | 17.70 | 16.24 | 15.50 | 17.18 | 17.61 | 17.57 | 16.42 | 16.97 |
| PTO2      | S-WSeSe-Cl     | 17.88 | 16.77 | 15.59 | 16.80 | 17.85 | 16.92 | 17.87 | 16.97 |
| D18       | CH1007         | 16.74 | 17.72 | 14.98 | 16.71 | 18.91 | 16.74 | 18.80 | 16.97 |
| PDTB-EF-T | BTP-2F-2Cl,SY2 | 17.68 | 16.78 | 15.31 | 15.95 | 18.71 | 17.35 | 15.65 | 16.96 |
| PDBT-F    | BTP-ClBr       | 18.15 | 16.24 | 15.85 | 17.29 | 17.82 | 16.43 | 16.29 | 16.96 |
| PDBT-F    | Y6-Se          | 18.35 | 16.66 | 15.32 | 16.01 | 18.03 | 17.38 | 16.21 | 16.96 |
| PBCT-2F   | A-WSeSe-Cl     | 17.91 | 16.96 | 15.78 | 16.83 | 16.81 | 17.45 | 18.17 | 16.96 |
| PDBT-F    | BTP-4Cl,eC9    | 17.63 | 16.38 | 15.43 | 16.98 | 17.84 | 17.46 | 16.50 | 16.95 |
| PDBT-F    | BTP-eC9        | 17.63 | 16.38 | 15.43 | 16.98 | 17.84 | 17.46 | 16.50 | 16.95 |
| PBQx-TF   | BTIC-BO-4Br    | 17.66 | 18.51 | 13.81 | 18.74 | 17.22 | 15.78 | 17.93 | 16.95 |
| PBQx-TF   | CH1007         | 16.84 | 20.59 | 12.52 | 17.70 | 18.06 | 15.94 | 18.80 | 16.94 |
| D18       | BTP-ClBr2      | 17.38 | 16.59 | 15.84 | 17.19 | 17.88 | 16.74 | 17.75 | 16.94 |
| PBN-S     | BTP-S9         | 17.72 | 16.45 | 15.58 | 16.60 | 17.90 | 17.34 | 16.16 | 16.93 |
| PDBT-Cl   | BTP-S2         | 17.93 | 16.22 | 16.25 | 17.29 | 17.01 | 16.89 | 16.51 | 16.93 |
| W1        | S-WSeSe-Cl     | 17.79 | 16.55 | 15.68 | 17.07 | 17.59 | 16.90 | 16.63 | 16.93 |
| PDBT-F    | BTP-FC1-FC1    | 17.99 | 16.43 | 15.59 | 16.00 | 18.21 | 17.34 | 16.42 | 16.93 |
| PFOPB     | S-WSeSe-Cl     | 17.74 | 16.95 | 15.86 | 17.11 | 17.25 | 16.65 | 16.94 | 16.93 |
| PDTB-EF-T | BO-4Cl         | 17.77 | 16.15 | 15.28 | 16.78 | 18.02 | 17.57 | 16.19 | 16.93 |
| PBDB-TSCl | BTP-S2         | 18.50 | 15.64 | 16.31 | 17.67 | 16.90 | 16.52 | 16.38 | 16.92 |
| PDBT-Cl   | CH1007         | 17.36 | 17.10 | 15.81 | 16.56 | 17.98 | 16.71 | 17.48 | 16.92 |
| PBCT-2F   | BTP-S1         | 18.59 | 17.08 | 16.00 | 16.16 | 16.61 | 17.05 | 18.05 | 16.92 |
| D18       | BTP-ClBr1      | 17.19 | 16.64 | 15.73 | 17.26 | 17.87 | 16.77 | 17.79 | 16.91 |
| PDTB-EF-T | BTP-eC9        | 17.68 | 16.23 | 15.23 | 16.76 | 18.02 | 17.52 | 16.11 | 16.91 |
| PDTB-EF-T | BTP-4Cl,eC9    | 17.68 | 16.23 | 15.23 | 16.76 | 18.02 | 17.52 | 16.11 | 16.91 |
| PDBT-F    | BTP-S9         | 17.63 | 16.49 | 15.52 | 16.45 | 18.05 | 17.27 | 16.38 | 16.90 |
| D18       | BTP-ClBr       | 17.40 | 16.38 | 16.06 | 17.24 | 17.81 | 16.51 | 17.44 | 16.90 |



|           |                |       |       |       |       |       |       |       |       |
|-----------|----------------|-------|-------|-------|-------|-------|-------|-------|-------|
| PBN-S     | BTP-FCI-FCI    | 17.98 | 16.38 | 15.64 | 16.18 | 18.03 | 17.20 | 16.15 | 16.90 |
| D18       | BTIC-BO-4Br    | 17.52 | 16.47 | 15.63 | 17.36 | 17.81 | 16.59 | 17.76 | 16.90 |
| PBDB-T-SF | LL3-2Cl        | 17.70 | 16.21 | 15.52 | 16.73 | 17.86 | 17.34 | 16.40 | 16.90 |
| PBDB-T-SF | BTP-S9         | 17.45 | 16.33 | 15.63 | 16.83 | 18.18 | 16.93 | 16.12 | 16.89 |
| PBDB-T-SF | Y6-Se          | 18.09 | 16.45 | 15.29 | 16.41 | 18.14 | 16.96 | 16.17 | 16.89 |
| PBT-SF    | BTP-ClBr       | 18.04 | 16.00 | 15.70 | 17.26 | 17.79 | 16.51 | 15.87 | 16.88 |
| W1        | BTP-S2         | 18.15 | 15.96 | 16.12 | 17.06 | 17.46 | 16.53 | 15.86 | 16.88 |
| PDTB-EF-T | BTP-FCI-FCI    | 17.58 | 16.62 | 15.34 | 15.84 | 18.73 | 17.15 | 15.51 | 16.88 |
| PDTB-EF-T | BTP-S9         | 17.40 | 16.53 | 15.29 | 16.24 | 18.49 | 17.30 | 15.72 | 16.88 |
| PBDB-T-SF | BTP-FCI-FCI    | 17.61 | 16.37 | 15.70 | 16.41 | 18.35 | 16.82 | 16.10 | 16.87 |
| PDBT-F    | BP5T-4F        | 17.95 | 16.63 | 15.18 | 15.96 | 18.10 | 17.41 | 16.42 | 16.87 |
| PDBT-Cl   | BTP-S1         | 17.84 | 16.51 | 16.26 | 16.40 | 17.47 | 16.74 | 16.44 | 16.87 |
| PTO2      | BTP-S2         | 18.11 | 15.73 | 16.04 | 16.78 | 17.85 | 16.72 | 17.04 | 16.87 |
| PBQx-TF   | BTP-S2         | 17.69 | 17.64 | 14.53 | 18.70 | 17.30 | 15.34 | 17.84 | 16.87 |
| PBDB-TSCl | A-WSSe-Cl      | 18.09 | 16.22 | 15.58 | 17.50 | 17.09 | 16.72 | 16.50 | 16.87 |
| PBN-S     | LL3-2Cl        | 17.61 | 16.29 | 15.48 | 16.69 | 17.49 | 17.62 | 16.46 | 16.87 |
| PBCT-2F   | BTP-ClBr1      | 18.00 | 16.61 | 15.57 | 16.89 | 16.75 | 17.28 | 18.04 | 16.85 |
| PBCT-2F   | BTIC-BO-4Br    | 18.44 | 16.44 | 15.52 | 17.02 | 16.60 | 17.08 | 18.00 | 16.85 |
| PBDB-T-SF | Y19            | 17.61 | 16.26 | 15.47 | 16.63 | 17.80 | 17.30 | 16.32 | 16.85 |
| SZ5       | S-WSeSe-Cl     | 17.55 | 16.92 | 15.74 | 16.94 | 16.95 | 16.96 | 17.53 | 16.84 |
| PBT-SF    | BO-4Cl         | 17.46 | 16.00 | 15.32 | 17.00 | 17.89 | 17.39 | 15.66 | 16.84 |
| PBQx-TF   | LL3            | 18.09 | 16.00 | 15.63 | 18.01 | 17.14 | 16.19 | 31.02 | 16.84 |
| PDBT-Cl   | A-WSSe-Cl      | 17.44 | 16.68 | 15.50 | 17.11 | 17.20 | 17.06 | 16.71 | 16.83 |
| PBT-SF    | BTP-4Cl,eC9    | 17.37 | 16.07 | 15.28 | 16.97 | 17.90 | 17.37 | 15.57 | 16.83 |
| PBT-SF    | BTP-eC9        | 17.37 | 16.07 | 15.28 | 16.97 | 17.90 | 17.37 | 15.57 | 16.83 |
| TPD-3F    | S-WSeSe-Cl     | 17.78 | 17.59 | 15.71 | 15.63 | 17.38 | 16.89 | 16.35 | 16.83 |
| PBCT-2F   | BTP-ClBr2      | 18.17 | 16.50 | 15.68 | 16.80 | 16.61 | 17.21 | 17.99 | 16.83 |
| PDTB-EF-T | LL3-2Cl        | 17.66 | 16.35 | 15.21 | 16.34 | 17.84 | 17.57 | 16.05 | 16.83 |
| PBCT-2F   | BTP-ClBr       | 18.17 | 16.36 | 15.90 | 16.88 | 16.69 | 16.95 | 17.57 | 16.82 |
| D18       | BO-4Cl         | 16.96 | 16.53 | 15.67 | 17.01 | 17.92 | 16.83 | 17.74 | 16.82 |
| PBT-SF    | BTP-2F-2Cl,SY2 | 17.39 | 16.56 | 15.36 | 16.04 | 18.50 | 17.08 | 15.11 | 16.82 |
| PBQx-TF   | BO-4Cl         | 17.10 | 17.67 | 14.77 | 18.11 | 17.36 | 15.91 | 17.78 | 16.82 |
| PBN-S     | Y19            | 17.54 | 16.35 | 15.43 | 16.59 | 17.45 | 17.55 | 16.38 | 16.82 |
| PBN-S     | Y6-Se          | 18.21 | 16.27 | 14.95 | 16.15 | 17.92 | 17.34 | 16.32 | 16.81 |
| PTO2      | CH1007         | 17.65 | 16.67 | 15.24 | 16.09 | 18.53 | 16.66 | 18.00 | 16.81 |
| D18       | BTP-2F-2Cl,SY2 | 16.99 | 16.99 | 15.61 | 16.10 | 18.68 | 16.47 | 17.56 | 16.81 |
| PDBT-F    | BTP-6F         | 17.96 | 16.57 | 14.70 | 15.93 | 18.58 | 17.09 | 16.62 | 16.80 |
| D18       | BTP-4Cl,eC9    | 16.91 | 16.59 | 15.62 | 16.96 | 17.96 | 16.77 | 17.67 | 16.80 |
| D18       | BTP-eC9        | 16.91 | 16.59 | 15.62 | 16.96 | 17.96 | 16.77 | 17.67 | 16.80 |
| PDBT-F    | LL3-2Cl        | 17.41 | 16.34 | 15.41 | 16.35 | 17.76 | 17.51 | 16.40 | 16.80 |
| PDBT-F    | Y6-2Se         | 17.52 | 16.94 | 15.73 | 16.18 | 18.08 | 16.31 | 15.93 | 16.79 |
| D18       | BTP-S1         | 17.14 | 16.95 | 15.83 | 16.55 | 18.39 | 15.89 | 17.81 | 16.79 |
| PBQx-TF   | BTP-4Cl,eC9    | 17.05 | 17.79 | 14.59 | 18.10 | 17.39 | 15.82 | 17.71 | 16.79 |
| PBQx-TF   | BTP-eC9        | 17.05 | 17.79 | 14.59 | 18.10 | 17.39 | 15.82 | 17.71 | 16.79 |
| D18       | BTP-S9         | 16.94 | 16.78 | 15.59 | 16.40 | 18.43 | 16.57 | 17.51 | 16.79 |
| PDTB-EF-T | Y19            | 17.55 | 16.43 | 15.16 | 16.24 | 17.84 | 17.49 | 16.01 | 16.78 |
| PTO2      | A-WSSe-Cl      | 17.63 | 16.29 | 15.33 | 16.63 | 17.89 | 16.93 | 17.34 | 16.78 |

|                      |             |       |       |       |       |       |       |       |       |
|----------------------|-------------|-------|-------|-------|-------|-------|-------|-------|-------|
| PBQx-TF              | LL4         | 17.30 | 16.74 | 15.31 | 17.97 | 17.40 | 15.95 | 30.67 | 16.78 |
| PBDB-T-SF            | TB-4Cl      | 17.72 | 16.25 | 15.30 | 16.59 | 17.73 | 17.06 | 16.09 | 16.78 |
| PDBT-F               | ABP4T-4F    | 18.04 | 16.52 | 15.04 | 15.75 | 18.16 | 17.14 | 16.36 | 16.77 |
| PBDB-TSCl            | BTP-S1      | 18.53 | 15.29 | 16.27 | 16.86 | 17.34 | 16.34 | 16.19 | 16.77 |
| W1                   | A-WSSe-Cl   | 17.51 | 16.30 | 15.42 | 16.88 | 17.58 | 16.92 | 16.01 | 16.77 |
| PBCT-2F              | BO-4Cl      | 17.67 | 16.48 | 15.53 | 16.59 | 16.79 | 17.50 | 17.97 | 16.76 |
| PBT-SF               | BTP-S9      | 17.12 | 16.47 | 15.31 | 16.36 | 18.30 | 16.99 | 15.15 | 16.76 |
| PBN-S                | TB-4Cl      | 17.62 | 16.33 | 15.26 | 16.53 | 17.44 | 17.35 | 16.15 | 16.75 |
| SZ5                  | BTP-S2      | 17.71 | 16.06 | 16.23 | 16.95 | 16.78 | 16.78 | 16.85 | 16.75 |
| PBDB-TSCl            | CH1007      | 17.78 | 15.84 | 15.77 | 16.93 | 17.87 | 16.33 | 17.01 | 16.75 |
| PBDB-TSCl            | BTP-ClBr2   | 18.24 | 15.76 | 15.47 | 17.46 | 17.12 | 16.46 | 16.30 | 16.75 |
| PBT-SF               | LL3-2Cl     | 17.47 | 16.23 | 15.26 | 16.30 | 17.80 | 17.45 | 15.54 | 16.75 |
| PBDB-TSCl            | BTIC-BO-4Br | 18.50 | 15.58 | 15.38 | 17.65 | 17.03 | 16.36 | 16.35 | 16.75 |
| PDBT-F               | Y19         | 17.31 | 16.41 | 15.37 | 16.23 | 17.69 | 17.48 | 16.35 | 16.75 |
| PDBT-F               | Y12         | 18.14 | 16.31 | 14.89 | 15.76 | 18.31 | 17.08 | 16.56 | 16.75 |
| PDBT-F               | Y6-BO       | 18.14 | 16.31 | 14.89 | 15.76 | 18.31 | 17.08 | 16.56 | 16.75 |
| PBQx-TF              | LL3-2Cl     | 17.14 | 17.84 | 14.53 | 17.66 | 17.37 | 15.95 | 17.68 | 16.75 |
| PDTB-EF-T            | Y6-Se       | 17.92 | 16.51 | 14.59 | 15.81 | 18.37 | 17.26 | 16.24 | 16.75 |
| PBDB-TSCl            | BTP-ClBr1   | 18.13 | 15.78 | 15.36 | 17.53 | 17.11 | 16.52 | 16.34 | 16.74 |
| PE4                  | S-WSeSe-Cl  | 16.94 | 16.49 | 15.84 | 17.05 | 17.69 | 16.38 | 16.69 | 16.73 |
| PBDB-T-SF            | BP5T-4F     | 17.40 | 16.43 | 15.16 | 16.28 | 18.21 | 16.88 | 15.93 | 16.73 |
| PFOPB                | A-WSSe-Cl   | 17.46 | 16.44 | 15.68 | 16.95 | 17.29 | 16.55 | 16.35 | 16.73 |
| BO2FC8               | S-WSeSe-Cl  | 17.21 | 16.94 | 16.09 | 16.32 | 16.76 | 17.02 | 16.63 | 16.72 |
| PBDB-T2F,PM6,PBDB-TF | BO-4Cl      | 17.17 | 16.26 | 15.60 | 16.61 | 17.57 | 17.12 | 16.29 | 16.72 |
| PDBT-F               | BTPTT-4F,Y6 | 17.98 | 16.42 | 15.09 | 15.41 | 18.27 | 17.15 | 16.36 | 16.72 |
| D18                  | LL3-2Cl     | 17.03 | 16.64 | 15.60 | 16.36 | 17.82 | 16.87 | 17.50 | 16.72 |
| PBCT-2F              | BTP-eC9     | 17.65 | 16.54 | 15.49 | 16.58 | 16.61 | 17.45 | 17.91 | 16.72 |
| PBCT-2F              | BTP-4Cl,eC9 | 17.65 | 16.54 | 15.49 | 16.58 | 16.61 | 17.45 | 17.91 | 16.72 |
| PBQ-4F               | LL3         | 17.61 | 14.83 | 15.89 | 17.69 | 17.23 | 17.06 | 26.43 | 16.72 |
| D18                  | BTP-FC1-FC1 | 16.78 | 16.89 | 15.63 | 16.01 | 18.82 | 16.17 | 17.51 | 16.72 |
| PDTB-EF-T            | TB-4Cl      | 17.57 | 16.25 | 14.99 | 16.18 | 17.98 | 17.33 | 15.83 | 16.72 |
| PBN-S                | Y6-2Se      | 17.32 | 16.82 | 15.18 | 16.39 | 17.94 | 16.64 | 15.86 | 16.71 |
| PBT-SF               | Y19         | 17.34 | 16.30 | 15.22 | 16.20 | 17.80 | 17.41 | 15.47 | 16.71 |
| PBN-S                | BP5T-4F     | 17.78 | 16.22 | 15.12 | 15.98 | 17.92 | 17.23 | 15.90 | 16.71 |
| PE4                  | BTP-S2      | 17.31 | 15.78 | 16.33 | 17.07 | 17.52 | 16.23 | 15.96 | 16.71 |
| PBT-SF               | BTP-FC1-FC1 | 17.20 | 16.38 | 15.38 | 15.95 | 18.49 | 16.85 | 15.02 | 16.71 |
| PTO2                 | BTP-ClBr2   | 17.85 | 15.86 | 15.28 | 16.59 | 17.97 | 16.69 | 17.09 | 16.71 |
| PDBT-F               | TB-4Cl      | 17.55 | 16.48 | 15.19 | 16.18 | 17.60 | 17.23 | 16.24 | 16.70 |
| W1                   | BTIC-BO-4Br | 17.93 | 15.94 | 15.18 | 17.03 | 17.69 | 16.45 | 15.79 | 16.70 |
| PTO2                 | BTP-S1      | 18.03 | 15.80 | 15.64 | 15.93 | 18.32 | 16.48 | 17.03 | 16.70 |
| SZ5                  | A-WSSe-Cl   | 17.26 | 16.60 | 15.49 | 16.78 | 17.03 | 17.03 | 17.04 | 16.70 |
| PBT1-EH              | S-WSeSe-Cl  | 17.90 | 17.24 | 15.91 | 16.74 | 15.46 | 16.90 | 15.59 | 16.69 |
| PBQx-TF              | Y19         | 17.02 | 17.95 | 14.35 | 17.59 | 17.39 | 15.85 | 17.62 | 16.69 |
| W1                   | BTP-S1      | 18.10 | 16.53 | 15.74 | 16.19 | 17.47 | 16.12 | 15.42 | 16.69 |
| PDBT-F               | N3          | 18.02 | 16.08 | 15.02 | 15.53 | 18.43 | 17.06 | 16.34 | 16.69 |
| D18                  | LL3         | 17.93 | 15.17 | 16.72 | 16.43 | 17.04 | 16.84 | 32.20 | 16.69 |
| PDBT-Cl              | BTP-ClBr2   | 17.61 | 16.08 | 15.37 | 17.10 | 17.20 | 16.76 | 16.53 | 16.69 |

|              |                |       |       |       |       |       |       |       |       |
|--------------|----------------|-------|-------|-------|-------|-------|-------|-------|-------|
| PBQx-TF      | BTP-S9         | 17.06 | 18.50 | 13.69 | 17.43 | 17.88 | 15.54 | 17.54 | 16.68 |
| W1           | BTP-ClBr2      | 17.71 | 15.87 | 15.31 | 16.84 | 17.68 | 16.69 | 15.73 | 16.68 |
| PTO2         | BTIC-BO-4Br    | 18.05 | 15.61 | 15.16 | 16.78 | 17.99 | 16.49 | 17.09 | 16.68 |
| W1           | BTP-ClBr1      | 17.57 | 16.07 | 15.20 | 16.91 | 17.65 | 16.67 | 15.72 | 16.68 |
| D18          | LL4            | 17.18 | 15.64 | 16.59 | 16.44 | 17.49 | 16.71 | 31.86 | 16.68 |
| PDBT-F       | BPS-4F         | 17.51 | 16.87 | 15.55 | 16.47 | 17.74 | 15.90 | 17.01 | 16.67 |
| D18          | Y19            | 16.92 | 16.70 | 15.54 | 16.24 | 17.83 | 16.80 | 17.45 | 16.67 |
| TPD-3F       | A-WSSe-Cl      | 17.53 | 17.06 | 15.69 | 15.42 | 17.42 | 16.90 | 15.68 | 16.67 |
| PBQx-TF      | BTP-S1         | 17.25 | 18.62 | 13.84 | 17.80 | 17.73 | 14.78 | 17.90 | 16.67 |
| PTO2         | BTP-ClBr1      | 17.66 | 15.83 | 15.17 | 16.66 | 18.00 | 16.70 | 17.11 | 16.67 |
| J62          | LL3            | 18.73 | 15.56 | 16.57 | 15.86 | 16.89 | 16.41 | 23.63 | 16.67 |
| PBDB-TSCl    | BTP-ClBr       | 18.27 | 15.58 | 15.69 | 17.52 | 17.06 | 15.87 | 16.26 | 16.67 |
| PDBT-Cl      | BTP-ClBr1      | 17.38 | 16.04 | 15.27 | 17.17 | 17.21 | 16.93 | 16.56 | 16.67 |
| PBDB-T-SF    | Y6-2Se         | 16.66 | 16.77 | 15.72 | 16.60 | 18.20 | 16.04 | 15.78 | 16.67 |
| PBDB-TSCl    | BO-4Cl         | 17.79 | 15.79 | 15.31 | 17.26 | 17.16 | 16.66 | 16.20 | 16.66 |
| PDBT-Cl      | BTIC-BO-4Br    | 17.77 | 15.73 | 15.29 | 17.29 | 17.14 | 16.76 | 16.55 | 16.66 |
| PTO2         | BTP-ClBr       | 17.84 | 15.62 | 15.49 | 16.64 | 17.93 | 16.47 | 16.80 | 16.66 |
| PDTB-EF-T    | LL4            | 17.52 | 15.64 | 16.27 | 15.77 | 17.67 | 17.10 | 28.14 | 16.66 |
| PBQx-TF      | BTP-2F-2Cl,SY2 | 17.09 | 18.78 | 13.75 | 17.10 | 17.94 | 15.30 | 17.59 | 16.66 |
| PBDB-T-SF    | BTP-6F         | 17.55 | 16.28 | 14.65 | 16.21 | 18.72 | 16.55 | 16.00 | 16.66 |
| PFOPB        | BTP-ClBr2      | 17.63 | 16.08 | 15.67 | 16.96 | 17.32 | 16.30 | 16.14 | 16.66 |
| PBN-S        | Y6-BO          | 17.91 | 16.18 | 14.91 | 15.73 | 18.20 | 17.01 | 16.07 | 16.65 |
| PBN-S        | Y12            | 17.91 | 16.18 | 14.91 | 15.73 | 18.20 | 17.01 | 16.07 | 16.65 |
| SZ5          | CH1007         | 16.98 | 16.80 | 15.37 | 16.23 | 17.75 | 16.77 | 17.84 | 16.65 |
| 2T-TTC-BDTFT | S-WSeSe-Cl     | 17.39 | 16.87 | 15.44 | 16.03 | 17.00 | 17.18 | 16.81 | 16.65 |
| W1           | BTP-ClBr       | 17.72 | 15.77 | 15.53 | 16.89 | 17.60 | 16.40 | 15.78 | 16.65 |
| PBDB-TSCl    | BTP-eC9        | 17.73 | 15.82 | 15.27 | 17.25 | 17.18 | 16.65 | 16.12 | 16.65 |
| PBDB-TSCl    | BTP-4Cl,eC9    | 17.73 | 15.82 | 15.27 | 17.25 | 17.18 | 16.65 | 16.12 | 16.65 |
| PFOPB        | BTP-S2         | 17.91 | 16.08 | 15.84 | 17.12 | 17.11 | 15.81 | 16.22 | 16.64 |
| PDTB-EF-T    | LL3            | 18.10 | 15.30 | 16.41 | 15.79 | 17.10 | 17.15 | 28.58 | 16.64 |
| PDBT-F       | L8-BO          | 18.04 | 16.37 | 15.08 | 15.32 | 17.84 | 17.19 | 16.33 | 16.64 |
| PBDB-T-SF    | HDO-4Cl        | 17.26 | 15.73 | 15.12 | 16.75 | 17.73 | 17.23 | 16.49 | 16.64 |
| PBFTT        | BTP-S2         | 18.26 | 15.71 | 15.94 | 16.77 | 17.15 | 15.98 | 15.97 | 16.64 |
| PDBT-Cl      | BO-4Cl         | 17.17 | 16.12 | 15.22 | 16.88 | 17.28 | 17.15 | 16.46 | 16.64 |
| PDBT-2F      | BTP-S2         | 17.62 | 15.47 | 15.69 | 17.52 | 17.37 | 16.13 | 15.19 | 16.63 |
| PBT-SF       | LL3            | 18.28 | 15.40 | 16.43 | 15.82 | 17.32 | 16.55 | 27.66 | 16.63 |
| PBCT-2F      | BTP-2F-2Cl,SY2 | 17.95 | 17.00 | 15.52 | 15.72 | 16.20 | 17.40 | 18.00 | 16.63 |
| PBCT-2F      | CH1007         | 18.01 | 17.76 | 15.18 | 16.26 | 15.34 | 17.24 | 19.25 | 16.63 |
| PDBT-F       | AQx            | 17.92 | 16.48 | 15.09 | 15.85 | 17.17 | 17.28 | 14.93 | 16.63 |
| J62          | S-WSeSe-Cl     | 17.25 | 17.02 | 15.97 | 16.53 | 16.37 | 16.66 | 14.46 | 16.63 |
| PDBT-2F      | S-WSeSe-Cl     | 17.31 | 16.23 | 15.11 | 17.50 | 17.47 | 16.16 | 15.97 | 16.63 |
| PDBT-F       | HDO-4Cl        | 17.34 | 15.92 | 15.03 | 16.36 | 17.62 | 17.50 | 16.57 | 16.63 |
| PBN-S        | ABP4T-4F       | 17.80 | 16.19 | 15.03 | 15.72 | 18.02 | 17.00 | 15.85 | 16.63 |
| PBT-SF       | LL4            | 17.48 | 15.75 | 16.41 | 15.81 | 17.75 | 16.56 | 27.16 | 16.62 |
| PDBT-Cl      | BTP-4Cl,eC9    | 17.12 | 16.16 | 15.18 | 16.83 | 17.31 | 17.14 | 16.38 | 16.62 |
| PDBT-Cl      | BTP-eC9        | 17.12 | 16.16 | 15.18 | 16.83 | 17.31 | 17.14 | 16.38 | 16.62 |
| PFOPB        | BTP-ClBr       | 17.65 | 15.86 | 15.85 | 17.02 | 17.27 | 16.08 | 16.18 | 16.62 |

|                      |                |       |       |       |       |       |       |       |       |
|----------------------|----------------|-------|-------|-------|-------|-------|-------|-------|-------|
| PDTB-EF-T            | BP5T-4F        | 17.27 | 16.51 | 14.73 | 15.67 | 18.38 | 17.16 | 14.56 | 16.62 |
| PBDB-T-SF            | ABP4T-4F       | 17.40 | 16.39 | 15.02 | 16.02 | 18.27 | 16.62 | 15.88 | 16.62 |
| PDBT-Cl              | BTP-2F-2Cl,SY2 | 17.36 | 16.55 | 15.29 | 15.94 | 17.56 | 16.98 | 16.15 | 16.61 |
| TPD-3F               | LL3            | 18.15 | 15.06 | 16.41 | 16.37 | 16.88 | 16.80 | 25.57 | 16.61 |
| PBDB-T-SF            | Y6-BO          | 17.53 | 16.28 | 14.83 | 16.01 | 18.43 | 16.60 | 16.10 | 16.61 |
| PBDB-T-SF            | Y12            | 17.53 | 16.28 | 14.83 | 16.01 | 18.43 | 16.60 | 16.10 | 16.61 |
| PDBT-F               | Y18            | 17.73 | 16.32 | 15.10 | 15.11 | 18.11 | 17.31 | 15.91 | 16.61 |
| PFOPB                | BTP-ClBr1      | 17.44 | 16.07 | 15.54 | 17.03 | 17.31 | 16.28 | 16.18 | 16.61 |
| PBDB-T2F,PM6,PBDB-TF | LL3-2Cl        | 17.19 | 16.29 | 15.53 | 16.05 | 17.50 | 17.11 | 16.25 | 16.61 |
| PBDB-T2F,PM6,PBDB-TF | BTP-FCl-FCI    | 17.30 | 16.36 | 15.64 | 15.66 | 17.83 | 16.88 | 15.96 | 16.61 |
| PBN-S                | HDO-4Cl        | 17.35 | 15.70 | 15.13 | 16.61 | 17.36 | 17.52 | 16.57 | 16.61 |
| TPD-3F               | LL4            | 17.47 | 15.69 | 16.17 | 16.36 | 17.26 | 16.67 | 25.09 | 16.60 |
| TPD-3F               | BTP-ClBr2      | 17.75 | 16.61 | 15.67 | 15.47 | 17.45 | 16.65 | 15.38 | 16.60 |
| PBT-SF               | TB-4Cl         | 17.26 | 16.08 | 15.04 | 16.16 | 17.85 | 17.21 | 15.31 | 16.60 |
| D18                  | TB-4Cl         | 16.83 | 16.63 | 15.36 | 16.17 | 17.96 | 16.63 | 17.40 | 16.60 |
| W1                   | CH1007         | 17.23 | 16.76 | 15.13 | 16.32 | 17.50 | 16.64 | 15.80 | 16.60 |
| PFOPB                | BTIC-BO-4Br    | 17.81 | 15.87 | 15.32 | 17.19 | 17.27 | 16.10 | 16.19 | 16.60 |
| PBFTT                | S-WSeSe-Cl     | 17.95 | 16.26 | 15.41 | 16.75 | 17.07 | 16.12 | 16.90 | 16.60 |
| PBCT-2F              | LL3-2Cl        | 17.44 | 16.62 | 15.47 | 15.98 | 16.57 | 17.50 | 17.67 | 16.60 |
| TPD-3F               | BTP-ClBr       | 17.76 | 16.57 | 15.85 | 15.57 | 17.40 | 16.40 | 15.45 | 16.59 |
| PBN-S                | BPS-4F         | 17.36 | 16.71 | 15.02 | 16.59 | 17.59 | 16.28 | 16.66 | 16.59 |
| TPD-3F               | BTP-S2         | 17.98 | 16.72 | 15.53 | 15.68 | 17.24 | 16.39 | 15.37 | 16.59 |
| PFBDB-T              | S-WSeSe-Cl     | 16.97 | 17.19 | 15.75 | 16.31 | 16.40 | 16.92 | 16.89 | 16.59 |
| TPD-3F               | BTP-ClBr1      | 17.54 | 16.78 | 15.44 | 15.58 | 17.47 | 16.72 | 15.36 | 16.59 |
| PDBT-Cl              | Y6-Se          | 17.69 | 16.48 | 15.12 | 15.87 | 17.48 | 16.88 | 16.20 | 16.59 |
| PBN-S                | N3             | 17.82 | 16.00 | 15.00 | 15.55 | 18.22 | 16.93 | 15.81 | 16.59 |
| PBN-S                | L8-BO          | 17.82 | 16.43 | 15.02 | 15.49 | 17.66 | 17.08 | 15.87 | 16.58 |
| PDTB-EF-T            | Y12            | 17.33 | 16.53 | 14.58 | 15.39 | 18.72 | 16.94 | 14.64 | 16.58 |
| PDTB-EF-T            | Y6-BO          | 17.33 | 16.53 | 14.58 | 15.39 | 18.72 | 16.94 | 14.64 | 16.58 |
| PBN-S                | Y11            | 17.77 | 16.26 | 14.82 | 15.54 | 17.93 | 17.17 | 16.04 | 16.58 |
| PBDB-T-2Cl           | S-WSeSe-Cl     | 17.09 | 17.08 | 15.89 | 16.75 | 16.09 | 16.60 | 16.92 | 16.58 |
| PTO2                 | BO-4Cl         | 17.39 | 15.72 | 15.09 | 16.38 | 17.92 | 16.99 | 17.07 | 16.58 |
| PBT-SF               | Y6-Se          | 17.52 | 15.96 | 14.84 | 15.94 | 18.21 | 17.02 | 15.79 | 16.58 |
| PBN-S                | BTP-6F         | 17.69 | 16.00 | 14.72 | 15.84 | 18.29 | 16.95 | 15.97 | 16.58 |
| PDTB-EF-T            | Y6-2Se         | 16.53 | 16.89 | 14.78 | 16.01 | 18.51 | 16.75 | 15.30 | 16.58 |
| PBN-S                | LL4            | 17.49 | 15.09 | 16.49 | 16.01 | 17.39 | 16.99 | 29.68 | 16.58 |
| SZ5                  | BTP-ClBr2      | 17.42 | 16.09 | 15.39 | 16.77 | 17.01 | 16.78 | 16.88 | 16.58 |
| BO2FC8               | BTP-S2         | 17.33 | 16.06 | 16.48 | 16.32 | 16.56 | 16.69 | 15.85 | 16.58 |
| PBN-S                | BTPTT-4F,Y6    | 17.74 | 16.19 | 15.02 | 15.42 | 18.08 | 17.00 | 15.80 | 16.57 |
| PBN-S                | Y18            | 17.81 | 16.25 | 14.98 | 15.32 | 17.92 | 17.15 | 15.77 | 16.57 |
| PBCT-2F              | BTP-S9         | 17.63 | 16.77 | 15.50 | 16.03 | 16.13 | 17.35 | 17.90 | 16.57 |
| PE4                  | A-WSSe-Cl      | 16.69 | 16.24 | 15.58 | 16.86 | 17.70 | 16.34 | 16.09 | 16.57 |
| PBQx-TF              | TB-4Cl         | 16.97 | 17.86 | 14.16 | 17.32 | 17.38 | 15.74 | 17.44 | 16.57 |
| PBN-S                | PT2IC-4Cl      | 17.14 | 15.34 | 15.64 | 16.96 | 17.11 | 17.20 | 15.92 | 16.57 |
| PDBT-Cl              | BTP-ClBr       | 17.63 | 15.74 | 15.59 | 17.16 | 17.16 | 16.12 | 16.29 | 16.57 |

|                      |                |       |       |       |       |       |       |       |       |
|----------------------|----------------|-------|-------|-------|-------|-------|-------|-------|-------|
| PBCT-2F              | BTP-FCI-FCI    | 17.93 | 16.95 | 15.55 | 15.63 | 16.05 | 17.25 | 17.95 | 16.56 |
| PBDB-T-SF            | N3             | 17.38 | 16.09 | 15.00 | 15.81 | 18.53 | 16.54 | 15.84 | 16.56 |
| PTO2                 | BTP-2F-2Cl,SY2 | 17.61 | 15.97 | 15.16 | 15.44 | 18.35 | 16.80 | 16.82 | 16.56 |
| PBFTT                | BTP-S1         | 18.30 | 16.31 | 16.04 | 15.79 | 17.15 | 15.74 | 15.82 | 16.56 |
| PDBT-Cl              | BTP-S9         | 17.17 | 16.25 | 15.26 | 16.30 | 17.49 | 16.85 | 16.13 | 16.55 |
| BO2FC8               | A-WSSe-Cl      | 16.94 | 16.48 | 15.84 | 16.17 | 16.82 | 17.07 | 16.02 | 16.55 |
| PTO2                 | BTP-4Cl,eC9    | 17.34 | 15.78 | 15.04 | 16.33 | 17.87 | 16.95 | 17.01 | 16.55 |
| PTO2                 | BTP-eC9        | 17.34 | 15.78 | 15.04 | 16.33 | 17.87 | 16.95 | 17.01 | 16.55 |
| PBDB-T-SF            | PT2IC-4Cl      | 16.98 | 15.28 | 15.68 | 17.07 | 17.48 | 16.80 | 15.87 | 16.55 |
| PDTB-EF-T            | HDO-4Cl        | 17.15 | 15.65 | 14.89 | 16.26 | 17.84 | 17.48 | 16.15 | 16.55 |
| SZ5                  | BTP-ClBr1      | 17.20 | 16.09 | 15.29 | 16.85 | 17.03 | 16.82 | 16.91 | 16.55 |
| PBT1-EH              | A-WSSe-Cl      | 17.67 | 16.84 | 15.84 | 16.54 | 15.47 | 16.93 | 14.76 | 16.55 |
| PBDB-TSCl            | BTP-2F-2Cl,SY2 | 17.85 | 15.69 | 15.38 | 16.39 | 17.56 | 16.39 | 15.85 | 16.54 |
| PBDB-TSCl            | LL3-2Cl        | 17.66 | 15.86 | 15.25 | 16.63 | 17.13 | 16.73 | 16.09 | 16.54 |
| PDTB-EF-T            | ABP4T-4F       | 17.19 | 16.51 | 14.69 | 15.39 | 18.55 | 16.94 | 14.41 | 16.54 |
| BO2FC8               | LL3            | 17.88 | 15.15 | 16.68 | 16.33 | 16.29 | 16.92 | 27.47 | 16.54 |
| W1                   | BO-4Cl         | 17.26 | 15.70 | 15.15 | 16.63 | 17.57 | 16.93 | 15.56 | 16.54 |
| PBDB-T-SF            | L8-BO          | 17.38 | 16.44 | 15.06 | 15.69 | 17.96 | 16.70 | 15.90 | 16.54 |
| PDBT-F               | LL4            | 17.19 | 14.79 | 16.55 | 16.48 | 17.60 | 16.63 | 33.12 | 16.54 |
| J61                  | LL3            | 18.79 | 15.69 | 16.64 | 15.87 | 16.61 | 15.63 | 23.75 | 16.54 |
| PBN-S                | AQx            | 17.78 | 16.30 | 14.92 | 15.96 | 17.14 | 17.13 | 15.01 | 16.54 |
| TPD-3F               | BTIC-BO-4Br    | 17.90 | 16.76 | 14.88 | 15.81 | 17.35 | 16.52 | 15.39 | 16.54 |
| SZ5                  | BTIC-BO-4Br    | 17.58 | 15.80 | 15.27 | 17.01 | 16.93 | 16.63 | 16.90 | 16.54 |
| PBN-S                | LL3            | 17.94 | 14.60 | 16.61 | 16.03 | 17.04 | 16.98 | 30.01 | 16.53 |
| 2T-TTC-BDTFT         | LL3            | 17.80 | 15.06 | 16.06 | 16.38 | 16.89 | 17.00 | 28.28 | 16.53 |
| PBDB-TSCl            | BTP-S9         | 17.63 | 15.73 | 15.36 | 16.70 | 17.48 | 16.29 | 15.84 | 16.53 |
| PDTB-EF-T            | Y11            | 17.25 | 16.60 | 14.50 | 15.29 | 18.41 | 17.11 | 14.80 | 16.53 |
| PBDB-T-SF            | LL4            | 17.49 | 14.90 | 16.61 | 16.17 | 17.69 | 16.33 | 30.31 | 16.53 |
| PBDB-T2F,PM6,PBDB-TF | LL4            | 17.19 | 14.75 | 16.53 | 16.44 | 17.40 | 16.84 | 30.32 | 16.53 |
| PBQx-TF              | BTP-FCI-FCI    | 16.91 | 18.74 | 13.65 | 16.99 | 17.93 | 14.94 | 17.52 | 16.53 |
| SZ5                  | BTP-S1         | 17.39 | 15.94 | 15.87 | 16.10 | 17.25 | 16.60 | 16.79 | 16.53 |
| PDTB-EF-T            | BTP-6F         | 17.28 | 16.18 | 14.41 | 15.40 | 18.98 | 16.88 | 14.18 | 16.52 |
| PBB-F                | S-WSeSe-Cl     | 17.17 | 17.77 | 14.95 | 16.13 | 16.12 | 16.97 | 18.23 | 16.52 |
| PDBT-F               | Y11            | 17.43 | 16.19 | 14.82 | 15.41 | 18.05 | 17.20 | 16.14 | 16.52 |
| SZ5                  | BO-4Cl         | 17.00 | 16.15 | 15.24 | 16.55 | 17.10 | 17.04 | 16.81 | 16.51 |
| PDBT-Cl              | BTP-FCI-FCI    | 17.35 | 16.25 | 15.34 | 15.85 | 17.54 | 16.76 | 16.11 | 16.51 |
| PTO2                 | BTP-S9         | 17.35 | 15.80 | 15.14 | 15.78 | 18.22 | 16.77 | 16.77 | 16.51 |
| PBDB-T-SF            | AQx            | 17.26 | 16.40 | 15.08 | 16.22 | 17.34 | 16.76 | 14.86 | 16.51 |
| PBDB-T2F,PM6,PBDB-TF | LL3            | 17.80 | 14.07 | 16.65 | 16.47 | 17.12 | 16.95 | 30.64 | 16.51 |
| W1                   | LL3            | 17.52 | 15.11 | 16.34 | 16.21 | 17.13 | 16.76 | 28.14 | 16.51 |
| PDTB-EF-T            | L8-BO          | 17.19 | 16.74 | 14.65 | 15.22 | 18.23 | 17.02 | 14.49 | 16.51 |
| PFOPB                | BO-4Cl         | 17.21 | 16.04 | 15.46 | 16.73 | 17.29 | 16.32 | 16.04 | 16.51 |
| PBDB-T-SF            | Y18            | 17.11 | 16.34 | 15.08 | 15.47 | 18.23 | 16.79 | 15.69 | 16.50 |
| PDBT-Cl              | LL3-2Cl        | 17.12 | 16.11 | 15.16 | 16.21 | 17.23 | 17.19 | 16.34 | 16.50 |
| PBDB-TSCl            | Y19            | 17.57 | 15.89 | 15.21 | 16.53 | 17.12 | 16.70 | 16.04 | 16.50 |

|                       |                      |       |       |       |       |       |       |       |       |
|-----------------------|----------------------|-------|-------|-------|-------|-------|-------|-------|-------|
| PDTB-EF-T             | N3                   | 17.21 | 16.34 | 14.66 | 15.26 | 18.68 | 16.87 | 14.41 | 16.50 |
| PBCT-2F               | Y19                  | 17.34 | 16.68 | 15.41 | 15.86 | 16.28 | 17.43 | 17.63 | 16.50 |
| 2T-TTC-<br>BDTFT      | A-WSSe-Cl            | 17.12 | 16.46 | 15.26 | 15.88 | 17.07 | 17.22 | 16.22 | 16.50 |
| W1                    | LL4                  | 17.03 | 15.45 | 16.19 | 16.21 | 17.50 | 16.62 | 27.68 | 16.50 |
| W1                    | BTP-eC9              | 17.21 | 15.79 | 15.11 | 16.58 | 17.45 | 16.86 | 15.46 | 16.50 |
| W1                    | BTP-4Cl,eC9          | 17.21 | 15.79 | 15.11 | 16.58 | 17.45 | 16.86 | 15.46 | 16.50 |
| D18                   | Y6-2Se               | 16.03 | 17.26 | 14.64 | 16.16 | 18.57 | 16.35 | 17.03 | 16.50 |
| J52-2F,J52-<br>F,PFBZ | S-WSeSe-Cl           | 16.75 | 16.46 | 15.72 | 16.77 | 16.79 | 16.51 | 16.45 | 16.50 |
| SZ5                   | BTP-ClBr             | 17.45 | 15.81 | 15.61 | 16.84 | 16.97 | 16.30 | 16.63 | 16.50 |
| PBQ-4F                | LL4                  | 16.87 | 15.30 | 15.73 | 17.64 | 16.50 | 16.94 | 25.93 | 16.50 |
| PDTB-EF-T             | Y18                  | 17.23 | 16.58 | 14.59 | 15.11 | 18.37 | 17.10 | 14.57 | 16.50 |
| PBQx-TF               | Y6-2Se               | 16.09 | 19.88 | 12.17 | 17.21 | 17.82 | 15.81 | 17.21 | 16.50 |
| W1                    | BTP-2F-<br>2Cl,SY2   | 17.51 | 16.60 | 15.16 | 15.70 | 17.44 | 16.56 | 14.96 | 16.49 |
| PDBT-F                | Y6-1O                | 17.81 | 16.15 | 14.69 | 15.18 | 18.03 | 17.10 | 16.30 | 16.49 |
| SZ5                   | BTP-eC9              | 16.95 | 16.19 | 15.19 | 16.52 | 17.11 | 17.00 | 16.73 | 16.49 |
| SZ5                   | BTP-4Cl,eC9          | 16.95 | 16.19 | 15.19 | 16.52 | 17.11 | 17.00 | 16.73 | 16.49 |
| PBN-S                 | SY3                  | 17.09 | 15.76 | 15.42 | 16.45 | 17.30 | 16.93 | 15.95 | 16.49 |
| PBN-S                 | PTIC-4Cl             | 17.30 | 15.22 | 15.53 | 16.81 | 17.05 | 17.04 | 15.80 | 16.49 |
| PBCT-2F               | LL3                  | 17.65 | 15.17 | 16.66 | 16.31 | 15.83 | 17.31 | 34.19 | 16.49 |
| TPD-3F                | BO-4Cl               | 17.31 | 16.54 | 15.65 | 15.16 | 17.45 | 16.81 | 15.25 | 16.49 |
| BO2FC8                | LL4                  | 17.04 | 15.61 | 16.56 | 16.30 | 16.63 | 16.79 | 26.98 | 16.49 |
| PBB-F                 | LL3                  | 18.01 | 16.15 | 15.59 | 16.31 | 15.94 | 16.91 | 30.27 | 16.49 |
| PBN-S                 | BT-BO-<br>L4F,BTP-S7 | 17.51 | 16.08 | 15.16 | 15.67 | 17.62 | 16.86 | 15.95 | 16.48 |
| PDBT-F                | PT2IC-4Cl            | 16.95 | 15.27 | 15.57 | 16.67 | 17.38 | 17.05 | 15.87 | 16.48 |
| PBDB-T-SF             | BPS-4F               | 16.40 | 16.62 | 15.56 | 16.84 | 17.86 | 15.61 | 16.65 | 16.48 |
| 2T-TTC-<br>BDTFT      | LL4                  | 17.12 | 15.45 | 15.88 | 16.35 | 17.15 | 16.93 | 27.82 | 16.48 |
| PDTB-EF-T             | BTPTT-<br>4F,Y6      | 17.10 | 16.49 | 14.64 | 15.15 | 18.55 | 16.94 | 14.33 | 16.48 |
| PTO2                  | BTP-FCI-FCI          | 17.69 | 15.71 | 15.19 | 15.35 | 18.36 | 16.57 | 16.77 | 16.48 |
| 2T-TTC-<br>BDTFT      | BTP-S2               | 17.54 | 15.95 | 15.37 | 16.05 | 16.95 | 17.00 | 16.10 | 16.48 |
| PBT1-EH               | BTP-ClBr2            | 17.85 | 16.44 | 15.86 | 16.62 | 15.41 | 16.69 | 14.42 | 16.48 |
| PBCT-2F               | LL4                  | 17.27 | 15.64 | 16.53 | 16.28 | 15.91 | 17.22 | 33.87 | 16.48 |
| PBN-S                 | Y22                  | 17.91 | 16.12 | 14.91 | 15.03 | 18.02 | 16.87 | 15.68 | 16.48 |
| PDTB-EF-T             | PT2IC-4Cl            | 16.88 | 15.28 | 15.37 | 16.56 | 17.53 | 17.22 | 15.47 | 16.48 |
| TPD-3F                | LL3-2Cl              | 17.34 | 16.73 | 15.45 | 15.13 | 17.35 | 16.85 | 15.10 | 16.47 |
| PFOPB                 | BTP-eC9              | 17.16 | 16.11 | 15.41 | 16.70 | 17.22 | 16.24 | 15.96 | 16.47 |
| PFOPB                 | BTP-4Cl,eC9          | 17.16 | 16.11 | 15.41 | 16.70 | 17.22 | 16.24 | 15.96 | 16.47 |
| D18                   | HDO-4Cl              | 16.62 | 16.10 | 15.26 | 16.38 | 17.83 | 16.65 | 17.68 | 16.47 |
| PFOPB                 | CH1007               | 17.21 | 17.08 | 14.45 | 16.39 | 17.42 | 16.27 | 16.91 | 16.47 |
| D18                   | BPS-4F               | 16.14 | 17.05 | 14.50 | 16.53 | 18.44 | 16.15 | 18.02 | 16.47 |
| TPD-3F                | BTP-4Cl,eC9          | 17.26 | 16.63 | 15.51 | 15.18 | 17.47 | 16.74 | 15.16 | 16.46 |
| TPD-3F                | BTP-eC9              | 17.26 | 16.63 | 15.51 | 15.18 | 17.47 | 16.74 | 15.16 | 16.46 |
| PBDB-T-SF             | PTIC-4Cl             | 17.16 | 15.17 | 15.56 | 16.91 | 17.42 | 16.57 | 15.76 | 16.46 |
| PBT1-EH               | BTP-ClBr1            | 17.66 | 16.51 | 15.73 | 16.76 | 15.36 | 16.76 | 14.38 | 16.46 |
| PBT-SF                | Y6-2Se               | 15.99 | 16.59 | 15.33 | 16.13 | 18.43 | 16.30 | 14.91 | 16.46 |
| J62                   | A-WSSe-Cl            | 16.90 | 16.76 | 15.74 | 16.38 | 16.43 | 16.55 | 13.58 | 16.46 |
| D18                   | SY1                  | 16.87 | 16.43 | 15.44 | 15.46 | 18.24 | 16.34 | 16.90 | 16.46 |

|            |                |       |       |       |       |       |       |       |       |
|------------|----------------|-------|-------|-------|-------|-------|-------|-------|-------|
| PBDB-T-SF  | LL3            | 17.91 | 14.40 | 16.69 | 16.18 | 17.26 | 16.32 | 30.62 | 16.46 |
| PBT1-EH    | BTP-ClBr       | 17.84 | 16.32 | 15.99 | 16.77 | 15.36 | 16.46 | 14.67 | 16.46 |
| PDBT-Cl    | Y19            | 17.03 | 16.16 | 15.11 | 16.09 | 17.19 | 17.16 | 16.27 | 16.46 |
| BO2FC8     | BTIC-BO-4Br    | 17.23 | 16.13 | 15.65 | 16.45 | 16.66 | 16.62 | 15.81 | 16.46 |
| J62        | LL4            | 17.58 | 15.88 | 16.40 | 15.84 | 16.79 | 16.23 | 23.11 | 16.45 |
| PBDB-T-SF  | Y11            | 17.03 | 16.30 | 14.75 | 15.71 | 18.15 | 16.78 | 15.94 | 16.45 |
| D18        | PT2IC-4Cl      | 16.56 | 15.67 | 15.76 | 16.65 | 17.50 | 16.57 | 16.96 | 16.45 |
| PBQx-TF    | Y6-Se          | 17.18 | 19.63 | 12.00 | 16.96 | 17.69 | 15.23 | 17.48 | 16.45 |
| BO2FC8     | BTP-ClBr2      | 17.07 | 16.02 | 15.77 | 16.20 | 16.81 | 16.84 | 15.76 | 16.45 |
| PDBT-2F    | A-WSSe-Cl      | 17.00 | 15.90 | 14.79 | 17.33 | 17.46 | 16.21 | 15.35 | 16.45 |
| PBN-S      | SY1            | 17.36 | 16.04 | 15.44 | 15.56 | 17.63 | 16.66 | 15.77 | 16.45 |
| W1         | BTP-S9         | 17.19 | 16.32 | 15.14 | 16.03 | 17.35 | 16.66 | 15.01 | 16.45 |
| BO2FC8     | BTP-ClBr       | 17.10 | 15.98 | 15.98 | 16.26 | 16.76 | 16.60 | 15.87 | 16.45 |
| TPD-3F     | BTP-S1         | 17.66 | 17.41 | 14.85 | 15.10 | 17.66 | 15.99 | 15.06 | 16.45 |
| PBDB-T-2Cl | BTP-S2         | 17.19 | 16.22 | 16.23 | 16.77 | 15.87 | 16.38 | 16.20 | 16.44 |
| TTFQx-T1   | S-WSeSe-Cl     | 17.12 | 16.71 | 15.41 | 15.95 | 16.16 | 17.31 | 16.25 | 16.44 |
| PBDB-TSCl  | TB-4Cl         | 17.69 | 15.84 | 15.03 | 16.48 | 17.10 | 16.49 | 15.85 | 16.44 |
| PBQx-TF    | SY3            | 16.66 | 17.11 | 14.54 | 17.22 | 17.24 | 15.86 | 17.16 | 16.44 |
| PFOPB      | LL4            | 17.37 | 14.90 | 16.30 | 16.58 | 17.23 | 16.23 | 28.48 | 16.44 |
| BO2FC8     | BTP-ClBr1      | 16.92 | 16.18 | 15.66 | 16.27 | 16.77 | 16.84 | 15.75 | 16.44 |
| PDBT-F     | Y22            | 17.79 | 16.08 | 14.93 | 14.85 | 18.14 | 16.84 | 15.84 | 16.44 |
| PDBT-F     | LL3            | 17.58 | 14.09 | 16.62 | 16.49 | 17.21 | 16.62 | 33.42 | 16.44 |
| PFBDB-T    | BTP-S2         | 17.10 | 16.23 | 15.90 | 16.31 | 16.34 | 16.73 | 16.16 | 16.43 |
| SZ5        | BTP-2F-2Cl,SY2 | 17.10 | 16.24 | 15.28 | 15.64 | 17.49 | 16.86 | 16.49 | 16.43 |
| PBN-S      | BTIC-2Cl-yCF3  | 17.35 | 16.38 | 14.98 | 15.78 | 17.17 | 16.93 | 15.91 | 16.43 |
| PBT1-EH    | LL3            | 18.33 | 15.57 | 16.58 | 15.84 | 15.39 | 16.89 | 24.09 | 16.43 |
| SZ5        | BTP-S9         | 17.00 | 16.16 | 15.25 | 16.00 | 17.43 | 16.76 | 16.48 | 16.43 |
| PFOPB      | LL3            | 18.05 | 14.24 | 16.44 | 16.60 | 16.86 | 16.40 | 28.95 | 16.43 |
| PDBT-F     | BTSe-4F        | 17.61 | 16.48 | 15.10 | 15.11 | 17.58 | 16.71 | 16.00 | 16.43 |
| D18        | SY3            | 16.49 | 16.09 | 15.55 | 16.16 | 17.73 | 16.56 | 17.03 | 16.43 |
| J62        | BTP-S2         | 17.32 | 16.33 | 16.22 | 16.54 | 16.42 | 15.75 | 13.42 | 16.43 |
| PBDB-TSCl  | BTP-FCI-FCI    | 17.77 | 15.38 | 15.43 | 16.30 | 17.54 | 16.16 | 15.78 | 16.43 |
| PBT-SF     | HDO-4Cl        | 16.84 | 15.49 | 14.85 | 16.32 | 17.76 | 17.30 | 15.57 | 16.43 |
| PBFTT      | A-WSSe-Cl      | 17.67 | 16.03 | 15.13 | 16.57 | 17.09 | 16.07 | 16.23 | 16.43 |
| PBT1-EH    | BTIC-BO-4Br    | 18.00 | 16.39 | 15.35 | 17.03 | 15.22 | 16.55 | 14.45 | 16.42 |
| PTO2       | LL3-2Cl        | 17.27 | 15.78 | 15.02 | 15.74 | 17.74 | 17.00 | 16.84 | 16.42 |
| PFBDB-T    | A-WSSe-Cl      | 16.70 | 16.77 | 15.52 | 16.14 | 16.48 | 16.94 | 16.30 | 16.42 |
| TPD-3F     | Y19            | 17.24 | 16.83 | 15.28 | 15.09 | 17.34 | 16.78 | 15.02 | 16.42 |
| PE4        | BTP-ClBr1      | 16.71 | 15.81 | 15.34 | 16.87 | 17.70 | 16.11 | 15.82 | 16.42 |
| PDTB-EF-T  | SY3            | 16.72 | 15.75 | 15.18 | 16.12 | 17.74 | 17.01 | 15.71 | 16.42 |
| PBQx-TF    | BPS-4F         | 16.25 | 19.55 | 11.95 | 17.47 | 17.59 | 15.70 | 18.02 | 16.42 |
| SZ5        | LL4            | 17.18 | 15.15 | 16.27 | 16.35 | 17.05 | 16.51 | 31.38 | 16.42 |
| PFOPB      | LL3-2Cl        | 17.29 | 16.11 | 15.38 | 16.15 | 17.20 | 16.36 | 16.00 | 16.42 |
| PDTB-EF-T  | AQx            | 17.16 | 16.59 | 14.54 | 15.66 | 17.47 | 17.07 | 13.95 | 16.42 |
| W1         | LL3-2Cl        | 17.14 | 15.93 | 15.09 | 15.98 | 17.44 | 16.92 | 15.59 | 16.42 |
| PBDB-T-2Cl | A-WSSe-Cl      | 16.79 | 16.75 | 15.63 | 16.58 | 16.15 | 16.59 | 16.33 | 16.42 |
| D18        | Y11            | 17.22 | 16.77 | 14.53 | 15.39 | 18.49 | 16.09 | 17.14 | 16.42 |

|                      |                  |       |       |       |       |       |       |       |       |
|----------------------|------------------|-------|-------|-------|-------|-------|-------|-------|-------|
| SZ5                  | LL3-2Cl          | 17.04 | 16.21 | 15.17 | 15.96 | 17.04 | 17.07 | 16.70 | 16.41 |
| PDTB-EF-T            | Y22              | 17.26 | 16.49 | 14.57 | 14.82 | 18.53 | 16.82 | 14.41 | 16.41 |
| PBDTSF-TZNT          | LL3              | 18.83 | 14.69 | 15.81 | 15.90 | 16.53 | 16.72 | 25.25 | 16.41 |
| PE4                  | BTIC-BO-4Br      | 16.95 | 15.63 | 15.32 | 16.97 | 17.67 | 15.93 | 15.87 | 16.41 |
| PBDB-T-SF            | SY3              | 16.77 | 15.71 | 15.41 | 16.60 | 17.63 | 16.34 | 15.83 | 16.41 |
| 2T-TTC-BDTFT         | BTP-ClBr2        | 17.32 | 16.03 | 15.21 | 15.88 | 17.05 | 16.96 | 15.97 | 16.41 |
| PBDB-T2F,PM6,PBDB-TF | Y12              | 17.07 | 16.23 | 15.00 | 15.32 | 18.13 | 16.71 | 15.98 | 16.41 |
| PBT1-EH              | BTP-S2           | 17.95 | 16.24 | 15.85 | 16.82 | 15.10 | 16.47 | 14.50 | 16.41 |
| PDTB-EF-T            | BT-BO-L4F,BTP-S7 | 16.72 | 16.42 | 14.87 | 15.38 | 18.23 | 16.81 | 14.79 | 16.41 |
| PDBT-Cl              | BP5T-4F          | 16.98 | 16.47 | 14.96 | 15.81 | 17.40 | 16.81 | 15.99 | 16.40 |
| W1                   | BTP-FCI-FCI      | 17.40 | 16.53 | 15.19 | 15.61 | 17.40 | 16.30 | 14.83 | 16.40 |
| J52-2F,J52-F,PFBZ    | BTP-S2           | 17.08 | 15.63 | 16.05 | 16.79 | 16.65 | 16.24 | 15.50 | 16.40 |
| PE4                  | BTP-ClBr2        | 16.73 | 15.75 | 15.45 | 16.79 | 17.59 | 16.10 | 15.83 | 16.40 |
| PDBT-2F              | BTP-S1           | 17.51 | 15.12 | 15.87 | 16.65 | 17.29 | 15.97 | 14.77 | 16.40 |
| PDTB-EF-T            | PTIC-4Cl         | 17.07 | 15.10 | 15.26 | 16.41 | 17.51 | 17.06 | 15.35 | 16.40 |
| PDBT-F               | BTIC-2Cl-yCF3    | 17.28 | 16.67 | 14.99 | 15.57 | 17.31 | 16.60 | 16.09 | 16.40 |
| PBDB-TSCl            | LL4              | 17.56 | 15.19 | 16.40 | 16.09 | 17.14 | 16.01 | 28.57 | 16.40 |
| PDBT-Cl              | Y6-2Se           | 16.67 | 16.47 | 15.58 | 16.04 | 17.65 | 15.94 | 15.79 | 16.39 |
| PE4                  | BTP-ClBr         | 16.80 | 15.56 | 15.67 | 16.85 | 17.65 | 15.82 | 15.86 | 16.39 |
| J62                  | BTP-ClBr2        | 17.09 | 16.31 | 15.64 | 16.41 | 16.59 | 16.31 | 13.25 | 16.39 |
| SZ5                  | LL3              | 17.83 | 14.67 | 16.42 | 16.38 | 16.54 | 16.51 | 31.70 | 16.39 |
| PDTB-EF-T            | BPS-4F           | 16.33 | 16.65 | 14.66 | 16.00 | 18.27 | 16.42 | 15.71 | 16.39 |
| J61                  | S-WSeSe-Cl       | 17.24 | 17.07 | 15.99 | 16.09 | 16.06 | 15.87 | 14.84 | 16.39 |
| PDBT-F               | PTIC-4Cl         | 17.09 | 15.16 | 15.45 | 16.51 | 17.32 | 16.80 | 15.76 | 16.39 |
| PBT-SF               | BP5T-4F          | 16.85 | 15.96 | 14.54 | 15.88 | 18.19 | 16.91 | 14.21 | 16.39 |
| PBQx-TF              | BTIC-2Br-m,TPT10 | 16.48 | 17.78 | 14.33 | 16.86 | 17.06 | 15.81 | 17.04 | 16.39 |
| PDBT-F               | BT-BO-L4F,BTP-S7 | 17.34 | 15.89 | 15.14 | 15.62 | 17.75 | 16.57 | 16.42 | 16.39 |
| J62                  | BTIC-BO-4Br      | 17.38 | 16.36 | 15.44 | 16.64 | 16.42 | 16.06 | 13.37 | 16.38 |
| PDTB-EF-T            | SY1              | 16.77 | 16.19 | 15.12 | 15.32 | 18.17 | 16.73 | 15.31 | 16.38 |
| D18                  | PTIC-4Cl         | 16.65 | 15.51 | 15.65 | 16.51 | 17.47 | 16.50 | 16.84 | 16.38 |
| TPD-3F               | BTP-2F-2Cl,SY2   | 17.41 | 17.39 | 14.78 | 14.49 | 17.74 | 16.49 | 14.63 | 16.38 |
| PBDTS-TDZ            | S-WSeSe-Cl       | 17.28 | 17.24 | 15.49 | 16.83 | 14.20 | 17.24 | 17.16 | 16.38 |
| D18                  | Y12              | 16.57 | 16.73 | 14.62 | 15.74 | 18.82 | 15.81 | 17.35 | 16.38 |
| D18                  | Y6-BO            | 16.57 | 16.73 | 14.62 | 15.74 | 18.82 | 15.81 | 17.35 | 16.38 |
| 2T-TTC-BDTFT         | BTP-ClBr1        | 17.10 | 16.10 | 15.07 | 15.96 | 17.03 | 17.01 | 15.96 | 16.38 |
| 2T-TTC-BDTFT         | BTP-ClBr         | 17.34 | 15.86 | 15.42 | 15.96 | 17.03 | 16.66 | 16.04 | 16.38 |
| PDTB-EF-T            | BTIC-2Cl-yCF3    | 16.86 | 16.58 | 14.68 | 15.46 | 17.74 | 16.95 | 15.56 | 16.38 |
| D18                  | BTIC-2Cl-yCF3    | 16.70 | 16.82 | 14.83 | 15.58 | 17.82 | 16.51 | 17.29 | 16.38 |
| PDBT-Cl              | TB-4Cl           | 17.08 | 16.19 | 14.93 | 16.03 | 17.12 | 16.91 | 16.11 | 16.38 |
| PBT-SF               | PT2IC-4Cl        | 16.63 | 15.17 | 15.42 | 16.64 | 17.49 | 16.90 | 15.07 | 16.37 |
| PDBT-F               | SY3              | 16.85 | 15.79 | 15.32 | 16.20 | 17.53 | 16.55 | 15.92 | 16.37 |



|                       |                      |       |       |       |       |       |       |       |       |
|-----------------------|----------------------|-------|-------|-------|-------|-------|-------|-------|-------|
| PBCT-2F               | TB-4Cl               | 17.57 | 16.56 | 15.23 | 15.79 | 15.82 | 17.26 | 17.66 | 16.37 |
| PTO2                  | Y19                  | 17.17 | 15.84 | 14.97 | 15.65 | 17.68 | 16.94 | 16.79 | 16.37 |
| TPD-3F                | CH1007               | 17.23 | 18.34 | 13.51 | 14.62 | 17.86 | 16.67 | 15.41 | 16.37 |
| SZ5                   | Y19                  | 16.93 | 16.25 | 15.13 | 15.85 | 17.05 | 17.01 | 16.63 | 16.37 |
| TTFQx-T1              | LL3                  | 17.41 | 14.89 | 16.06 | 16.03 | 16.95 | 16.88 | 26.54 | 16.37 |
| BO2FC8                | BTP-S9               | 16.61 | 16.34 | 15.59 | 15.41 | 17.36 | 16.90 | 15.07 | 16.37 |
| PBQx-TF               | PT2IC-4Cl            | 16.73 | 16.24 | 14.63 | 17.86 | 17.11 | 15.64 | 17.13 | 16.37 |
| P-FT                  | LL3                  | 17.89 | 14.55 | 16.36 | 16.36 | 16.76 | 16.28 | 26.25 | 16.37 |
| J62                   | BTP-ClBr             | 17.03 | 16.23 | 15.86 | 16.47 | 16.42 | 16.18 | 13.60 | 16.37 |
| PBZ-ClSi              | S-WSeSe-Cl           | 16.71 | 15.45 | 16.58 | 17.11 | 16.12 | 16.22 | 15.91 | 16.36 |
| PBN-S                 | Y6-1O                | 17.54 | 15.91 | 14.72 | 15.13 | 17.90 | 16.95 | 15.93 | 16.36 |
| PBZ-ClSi              | LL3                  | 19.31 | 14.10 | 17.35 | 15.82 | 15.61 | 15.95 | 25.88 | 16.36 |
| BO2FC8                | BO-4Cl               | 16.67 | 16.00 | 15.60 | 15.95 | 16.84 | 17.09 | 15.60 | 16.36 |
| BO2FC8                | CH1007               | 16.27 | 16.96 | 15.31 | 15.55 | 17.24 | 16.79 | 15.80 | 16.36 |
| PFOPB                 | Y19                  | 17.19 | 16.19 | 15.32 | 16.04 | 17.12 | 16.28 | 15.93 | 16.35 |
| J62                   | BTP-ClBr1            | 16.99 | 16.50 | 15.52 | 16.48 | 16.39 | 16.25 | 13.25 | 16.35 |
| PDBT-F                | SY1                  | 17.20 | 16.03 | 15.32 | 15.50 | 17.78 | 16.30 | 15.78 | 16.35 |
| TTFQx-T1              | BTP-S2               | 17.36 | 15.55 | 15.82 | 15.96 | 16.33 | 17.09 | 15.20 | 16.35 |
| D18                   | BT-BO-<br>L4F,BTP-S7 | 16.70 | 16.58 | 14.77 | 15.56 | 18.34 | 16.15 | 17.24 | 16.35 |
| PBB-F                 | A-WSSe-Cl            | 16.91 | 17.34 | 14.94 | 15.92 | 16.14 | 16.87 | 17.70 | 16.35 |
| W1                    | Y19                  | 17.04 | 16.02 | 15.05 | 15.90 | 17.26 | 16.84 | 15.50 | 16.35 |
| PBQx-TF               | Y9-2Br               | 16.62 | 17.46 | 14.62 | 16.76 | 16.67 | 15.97 | 16.76 | 16.35 |
| 2T-TTC-<br>BDTFT      | BTIC-BO-<br>4Br      | 17.45 | 15.92 | 14.86 | 16.14 | 16.90 | 16.80 | 16.02 | 16.35 |
| PTO2                  | LL4                  | 17.24 | 14.42 | 16.12 | 16.24 | 17.39 | 16.66 | 31.19 | 16.35 |
| PBCT-2F               | Y6-Se                | 18.18 | 16.98 | 14.67 | 15.64 | 15.28 | 17.31 | 17.50 | 16.34 |
| PBDB-T-SF             | Y22                  | 17.09 | 16.19 | 14.92 | 15.19 | 18.26 | 16.41 | 15.55 | 16.34 |
| PBDB-T-SF             | BTSe-4F              | 16.86 | 16.38 | 15.16 | 15.52 | 17.72 | 16.42 | 15.60 | 16.34 |
| D18                   | BP5T-4F              | 16.47 | 16.78 | 14.61 | 15.95 | 18.55 | 15.67 | 17.23 | 16.34 |
| PBT1-EH               | LL3-2Cl              | 17.44 | 16.33 | 15.55 | 16.39 | 15.41 | 16.91 | 14.18 | 16.34 |
| J52-2F,J52-<br>F,PFBZ | LL3                  | 17.73 | 14.75 | 16.34 | 16.23 | 16.63 | 16.35 | 27.48 | 16.34 |
| PTO2                  | TB-4Cl               | 17.25 | 15.86 | 14.79 | 15.56 | 17.78 | 16.77 | 16.74 | 16.34 |
| PBDB-T-SF             | BTIC-2Cl-<br>yCF3    | 16.88 | 16.31 | 15.08 | 15.98 | 17.43 | 16.33 | 15.83 | 16.34 |
| PBCT-2F               | HDO-4Cl              | 17.35 | 16.04 | 15.10 | 16.00 | 16.08 | 17.44 | 17.81 | 16.34 |
| PE4                   | BO-4Cl               | 16.44 | 15.72 | 15.30 | 16.58 | 17.61 | 16.37 | 15.65 | 16.33 |
| BO2FC8                | BTP-eC9              | 16.61 | 16.06 | 15.55 | 15.93 | 16.83 | 17.03 | 15.50 | 16.33 |
| BO2FC8                | BTP-4Cl,eC9          | 16.61 | 16.06 | 15.55 | 15.93 | 16.83 | 17.03 | 15.50 | 16.33 |
| PFOPB                 | BTP-S1               | 17.55 | 16.22 | 15.30 | 16.29 | 17.30 | 15.33 | 16.05 | 16.33 |
| PBN-S                 | BTSe-4F              | 17.39 | 16.25 | 14.79 | 15.31 | 17.39 | 16.86 | 15.62 | 16.33 |
| PBDB-TSCl             | LL3                  | 18.01 | 14.78 | 16.48 | 16.10 | 16.63 | 15.98 | 29.06 | 16.33 |
| PDBT-Cl               | HDO-4Cl              | 16.89 | 15.77 | 14.79 | 16.21 | 17.20 | 17.12 | 16.46 | 16.33 |
| PFBDB-T               | LL3                  | 17.53 | 14.36 | 16.33 | 16.26 | 16.73 | 16.76 | 29.02 | 16.33 |
| PTO2                  | Y6-Se                | 17.82 | 15.52 | 14.64 | 15.35 | 17.99 | 16.65 | 16.73 | 16.33 |
| J52-2F,J52-<br>F,PFBZ | A-WSSe-Cl            | 16.48 | 16.17 | 15.47 | 16.62 | 16.75 | 16.49 | 15.74 | 16.33 |
| PDBT-Cl               | LL4                  | 17.16 | 14.64 | 16.32 | 16.38 | 17.20 | 16.26 | 31.18 | 16.33 |
| PFOPB                 | BTP-S9               | 17.19 | 16.22 | 15.24 | 16.17 | 17.17 | 15.98 | 15.69 | 16.33 |
| PBCT-2F               | BP5T-4F              | 17.74 | 17.01 | 14.82 | 15.57 | 15.56 | 17.26 | 17.72 | 16.33 |
| PBQx-TF               | HDO-4Cl              | 16.74 | 16.53 | 14.41 | 17.36 | 17.32 | 15.60 | 17.78 | 16.33 |

|                              |                    |       |       |       |       |       |       |       |       |
|------------------------------|--------------------|-------|-------|-------|-------|-------|-------|-------|-------|
| TPD-3F                       | BTP-S9             | 17.28 | 17.08 | 14.73 | 14.62 | 17.65 | 16.57 | 14.66 | 16.32 |
| PFBDB-T                      | BTP-ClBr2          | 16.81 | 16.36 | 15.49 | 16.13 | 16.45 | 16.69 | 16.07 | 16.32 |
| 2T-TTC-<br>BDTFT             | BO-4Cl             | 16.89 | 15.94 | 15.03 | 15.63 | 17.13 | 17.26 | 15.81 | 16.32 |
| PBT1-EH                      | BO-4Cl             | 17.43 | 16.25 | 15.65 | 16.25 | 15.43 | 16.88 | 14.25 | 16.32 |
| PBDB-T-2Cl                   | BTP-ClBr2          | 16.90 | 16.22 | 15.58 | 16.58 | 16.27 | 16.34 | 16.12 | 16.31 |
| PBDB-<br>T2F,PM6,PB<br>DB-TF | BPS-4F             | 16.76 | 16.91 | 14.64 | 16.02 | 17.43 | 16.11 | 16.52 | 16.31 |
| PDBT-2F                      | BTP-ClBr1          | 16.96 | 15.45 | 14.57 | 17.34 | 17.48 | 16.06 | 15.04 | 16.31 |
| PBQx-TF                      | SY1                | 16.97 | 17.96 | 13.37 | 16.36 | 17.69 | 15.53 | 17.09 | 16.31 |
| PBCT-2F                      | PT2IC-4Cl          | 16.94 | 15.60 | 15.63 | 16.34 | 16.14 | 17.22 | 17.15 | 16.31 |
| PBT-SF                       | Y6-BO              | 16.91 | 16.04 | 14.13 | 15.61 | 18.51 | 16.65 | 14.35 | 16.31 |
| PBT-SF                       | Y12                | 16.91 | 16.04 | 14.13 | 15.61 | 18.51 | 16.65 | 14.35 | 16.31 |
| PE4                          | BTP-S1             | 16.61 | 15.72 | 16.06 | 16.14 | 17.33 | 15.99 | 15.50 | 16.31 |
| PDBT-2F                      | BTIC-BO-<br>4Br    | 17.28 | 15.24 | 14.53 | 17.44 | 17.46 | 15.91 | 15.08 | 16.31 |
| BO2FC8                       | LL3-2Cl            | 16.82 | 16.18 | 15.52 | 15.55 | 16.70 | 17.08 | 15.53 | 16.31 |
| PBFTT                        | BTIC-BO-<br>4Br    | 18.11 | 15.46 | 14.90 | 16.67 | 17.06 | 15.65 | 15.96 | 16.31 |
| PBT1-EH                      | LL4                | 17.56 | 15.85 | 16.39 | 15.81 | 15.48 | 16.76 | 23.58 | 16.31 |
| PBFTT                        | BTP-ClBr1          | 17.70 | 15.66 | 14.89 | 16.58 | 17.18 | 15.84 | 15.95 | 16.31 |
| J61                          | LL4                | 17.56 | 16.00 | 16.48 | 15.84 | 16.62 | 15.34 | 23.23 | 16.31 |
| PBB-F                        | LL4                | 17.11 | 16.51 | 15.24 | 16.28 | 15.96 | 16.74 | 29.77 | 16.31 |
| PBDB-T-SF                    | Y6-1O              | 17.02 | 16.08 | 14.66 | 15.37 | 18.14 | 16.57 | 15.90 | 16.31 |
| PBDB-TSCl                    | HDO-4Cl            | 17.29 | 15.25 | 14.88 | 16.65 | 17.13 | 16.62 | 16.22 | 16.30 |
| PFOPB                        | BTP-2F-<br>2Cl,SY2 | 17.31 | 16.38 | 15.23 | 15.84 | 17.23 | 15.83 | 15.71 | 16.30 |
| SZ5                          | BTP-FCI-FCI        | 16.89 | 15.96 | 15.30 | 15.56 | 17.47 | 16.63 | 16.45 | 16.30 |
| PBFTT                        | BTP-ClBr2          | 17.83 | 15.59 | 15.00 | 16.51 | 17.06 | 15.83 | 15.91 | 16.30 |
| D18                          | ABP4T-4F           | 16.40 | 16.75 | 14.58 | 15.73 | 18.66 | 15.69 | 17.15 | 16.30 |
| PBB-F                        | BTP-ClBr           | 17.00 | 16.92 | 15.10 | 16.18 | 16.04 | 16.58 | 17.31 | 16.30 |
| PBDTSF-<br>TZNT              | S-WSeSe-Cl         | 16.84 | 15.42 | 15.09 | 17.23 | 16.34 | 16.87 | 16.04 | 16.30 |
| J52-2F,J52-<br>F,PFBZ        | BTIC-BO-<br>4Br    | 16.78 | 15.80 | 15.19 | 16.84 | 17.11 | 16.07 | 15.47 | 16.30 |
| 2T-TTC-<br>BDTFT             | BTP-eC9            | 16.84 | 15.99 | 14.97 | 15.62 | 17.16 | 17.20 | 15.71 | 16.30 |
| 2T-TTC-<br>BDTFT             | BTP-4Cl,eC9        | 16.84 | 15.99 | 14.97 | 15.62 | 17.16 | 17.20 | 15.71 | 16.30 |
| BO2FC8                       | BTP-2F-<br>2Cl,SY2 | 16.58 | 16.32 | 15.62 | 15.17 | 17.31 | 16.79 | 15.02 | 16.30 |
| P5T-2F                       | S-WSeSe-Cl         | 16.06 | 17.70 | 15.86 | 17.48 | 14.03 | 16.65 | 16.99 | 16.30 |
| PBT-SF                       | Y11                | 17.04 | 16.34 | 14.05 | 15.24 | 18.27 | 16.83 | 14.43 | 16.29 |
| PBQx-TF                      | BTIC-2Cl-<br>yCF3  | 16.84 | 18.86 | 12.56 | 16.59 | 17.21 | 15.70 | 17.32 | 16.29 |
| PBT1-EH                      | BTP-4Cl,eC9        | 17.38 | 16.29 | 15.58 | 16.27 | 15.43 | 16.81 | 14.16 | 16.29 |
| PBT1-EH                      | BTP-eC9            | 17.38 | 16.29 | 15.58 | 16.27 | 15.43 | 16.81 | 14.16 | 16.29 |
| PBDB-TSCl                    | Y6-Se              | 17.95 | 14.75 | 15.09 | 16.28 | 17.38 | 16.30 | 15.96 | 16.29 |
| PDBT-2F                      | BTP-ClBr2          | 17.07 | 15.42 | 14.65 | 17.27 | 17.43 | 15.91 | 15.07 | 16.29 |
| PDTB-EF-T                    | Y6-1O              | 16.80 | 16.31 | 14.39 | 14.82 | 18.52 | 16.89 | 14.58 | 16.29 |
| PBT-SF                       | PTIC-4Cl           | 16.82 | 14.98 | 15.30 | 16.47 | 17.45 | 16.72 | 14.98 | 16.29 |
| PBT1-EH                      | Y19                | 17.34 | 16.39 | 15.46 | 16.36 | 15.37 | 16.82 | 14.09 | 16.29 |
| PBQx-TF                      | PTIC-4Cl           | 16.79 | 15.98 | 14.55 | 17.68 | 17.09 | 15.63 | 17.00 | 16.29 |
| PDBT-Cl                      | ABP4T-4F           | 16.93 | 16.35 | 14.79 | 15.59 | 17.56 | 16.51 | 15.94 | 16.29 |

|                      |                  |       |       |       |       |       |       |       |       |
|----------------------|------------------|-------|-------|-------|-------|-------|-------|-------|-------|
| PBDTS-TDZ            | LL3              | 18.77 | 16.26 | 16.29 | 15.58 | 13.61 | 17.20 | 26.80 | 16.29 |
| PBT-SF               | ABP4T-4F         | 16.77 | 15.96 | 14.34 | 15.64 | 18.34 | 16.65 | 14.11 | 16.28 |
| PFBDB-T              | LL4              | 16.79 | 14.97 | 16.18 | 16.24 | 16.87 | 16.65 | 28.53 | 16.28 |
| TPD-3F               | BTP-FCI-FCI      | 17.30 | 17.39 | 14.70 | 14.38 | 17.69 | 16.24 | 14.49 | 16.28 |
| PTO2                 | Y6-2Se           | 16.79 | 16.19 | 14.87 | 15.52 | 18.11 | 16.20 | 16.24 | 16.28 |
| PDBT-Cl              | Y12              | 17.05 | 16.12 | 14.63 | 15.61 | 17.77 | 16.49 | 16.16 | 16.28 |
| PDBT-Cl              | Y6-BO            | 17.05 | 16.12 | 14.63 | 15.61 | 17.77 | 16.49 | 16.16 | 16.28 |
| PBT-SF               | L8-BO            | 16.77 | 16.49 | 14.41 | 15.22 | 18.04 | 16.73 | 14.22 | 16.28 |
| PFBDB-T              | BTP-ClBr         | 16.84 | 16.10 | 15.69 | 16.21 | 16.40 | 16.42 | 16.07 | 16.28 |
| PBDB-TSCl            | Y6-2Se           | 16.57 | 15.79 | 15.56 | 16.48 | 17.60 | 15.67 | 15.56 | 16.28 |
| SZ5                  | TB-4Cl           | 16.90 | 16.21 | 14.95 | 15.73 | 17.07 | 16.79 | 16.46 | 16.28 |
| PFBDB-T              | BTP-ClBr1        | 16.63 | 16.31 | 15.35 | 16.21 | 16.43 | 16.71 | 16.11 | 16.28 |
| PBT-SF               | BPS-4F           | 15.74 | 16.35 | 15.15 | 16.46 | 18.06 | 15.87 | 15.31 | 16.27 |
| PBDB-T2F,PM6,PBDB-TF | N3               | 17.01 | 16.03 | 14.89 | 15.12 | 17.98 | 16.61 | 15.73 | 16.27 |
| TTFQx-T1             | A-WSeSe-Cl       | 16.85 | 16.18 | 15.17 | 15.81 | 16.22 | 17.41 | 15.50 | 16.27 |
| PTO2                 | LL3              | 17.72 | 13.80 | 16.26 | 16.24 | 16.81 | 16.80 | 31.53 | 16.27 |
| PBN-S                | BTP-2F-ThCl      | 17.20 | 16.06 | 15.46 | 15.56 | 17.14 | 16.21 | 15.61 | 16.27 |
| PE4                  | BTP-eC9          | 16.32 | 15.79 | 15.25 | 16.53 | 17.40 | 16.33 | 15.56 | 16.27 |
| PE4                  | BTP-4Cl,eC9      | 16.32 | 15.79 | 15.25 | 16.53 | 17.40 | 16.33 | 15.56 | 16.27 |
| PBDB-T-SF            | BT-BO-L4F,BTP-S7 | 16.54 | 15.99 | 15.13 | 15.83 | 17.87 | 16.24 | 15.93 | 16.27 |
| TPD-3F               | TB-4Cl           | 17.18 | 16.68 | 15.10 | 14.76 | 17.28 | 16.60 | 14.88 | 16.27 |
| PBQx-TF              | Y11              | 17.34 | 18.92 | 12.50 | 16.28 | 17.83 | 14.73 | 17.29 | 16.27 |
| PBFTT                | BTP-ClBr         | 17.84 | 15.37 | 15.22 | 16.56 | 17.09 | 15.52 | 15.82 | 16.27 |
| PBDT-3TCO            | S-WSeSe-Cl       | 17.12 | 17.04 | 15.01 | 14.93 | 17.11 | 16.39 | 17.70 | 16.27 |
| D18                  | Y18              | 16.93 | 16.77 | 14.46 | 15.12 | 18.49 | 15.83 | 16.86 | 16.27 |
| PTO2                 | BPS-4F           | 16.92 | 16.20 | 14.67 | 15.86 | 17.93 | 16.01 | 17.25 | 16.26 |
| PBDB-TSCl            | PT2IC-4Cl        | 17.02 | 15.03 | 15.41 | 16.97 | 16.92 | 16.23 | 15.62 | 16.26 |
| J52-2F,J52-F,PFBZ    | BTP-ClBr1        | 16.51 | 15.95 | 15.25 | 16.69 | 16.93 | 16.25 | 15.41 | 16.26 |
| BO2FC8               | BTP-S1           | 16.69 | 16.03 | 16.00 | 15.64 | 16.89 | 16.32 | 15.46 | 16.26 |
| PBT-SF               | SY3              | 16.48 | 15.62 | 15.13 | 16.11 | 17.66 | 16.57 | 15.35 | 16.26 |
| PBDB-T-SF            | SY1              | 16.75 | 15.89 | 15.34 | 15.73 | 17.86 | 16.00 | 15.67 | 16.26 |
| 2T-TTC-BDTFT         | LL3-2Cl          | 16.92 | 16.10 | 14.95 | 15.23 | 17.11 | 17.25 | 15.77 | 16.26 |
| D18                  | BTP-2F-ThCl      | 16.72 | 16.48 | 15.45 | 15.49 | 18.07 | 15.34 | 16.74 | 16.26 |
| BO2FC8               | Y19              | 16.70 | 16.24 | 15.47 | 15.45 | 16.68 | 17.01 | 15.45 | 16.26 |
| PDBT-F               | BTP-2F-ThCl      | 17.30 | 15.97 | 15.39 | 15.48 | 17.25 | 16.15 | 15.63 | 16.26 |
| PBDB-T-2Cl           | BTP-ClBr1        | 16.72 | 16.18 | 15.46 | 16.66 | 16.14 | 16.35 | 16.16 | 16.25 |
| SZ5                  | Y6-Se            | 17.31 | 15.77 | 14.77 | 15.58 | 17.35 | 16.74 | 16.48 | 16.25 |
| PDBT-Cl              | PT2IC-4Cl        | 16.72 | 15.23 | 15.32 | 16.54 | 16.99 | 16.72 | 15.84 | 16.25 |
| PDBT-Cl              | LL3              | 17.65 | 14.09 | 16.42 | 16.41 | 16.71 | 16.24 | 31.48 | 16.25 |
| PDBT-2F              | BO-4Cl           | 16.67 | 15.57 | 14.48 | 17.09 | 17.42 | 16.28 | 14.92 | 16.25 |
| PBT-SF               | Y18              | 16.92 | 16.16 | 14.48 | 14.96 | 18.16 | 16.82 | 14.23 | 16.25 |
| PBT-SF               | BTIC-2Cl-yCF3    | 16.58 | 16.42 | 14.76 | 15.49 | 17.67 | 16.57 | 14.98 | 16.25 |
| J52-2F,J52-F,PFBZ    | BTP-ClBr2        | 16.57 | 15.77 | 15.37 | 16.62 | 16.90 | 16.24 | 15.42 | 16.25 |
| P-FT                 | S-WSeSe-Cl       | 16.60 | 16.05 | 15.76 | 16.09 | 16.49 | 16.48 | 16.05 | 16.25 |

|                   |             |       |       |       |       |       |       |       |       |
|-------------------|-------------|-------|-------|-------|-------|-------|-------|-------|-------|
| J52-2F,J52-F,PFBZ | BTP-ClBr    | 16.62 | 15.68 | 15.58 | 16.68 | 16.90 | 16.00 | 15.60 | 16.24 |
| PBDB-T-2Cl        | BTP-ClBr    | 16.93 | 15.87 | 15.79 | 16.65 | 16.15 | 16.08 | 16.11 | 16.24 |
| TTFQx-T1          | BTIC-BO-4Br | 17.19 | 15.86 | 14.89 | 16.12 | 16.37 | 17.03 | 15.19 | 16.24 |
| PDBT-Cl           | BPS-4F      | 16.80 | 16.33 | 15.34 | 16.30 | 17.22 | 15.46 | 16.68 | 16.24 |
| PBT-SF            | AQx         | 16.72 | 16.08 | 14.51 | 15.75 | 17.60 | 16.79 | 13.58 | 16.24 |
| PFBDB-T           | BTIC-BO-4Br | 16.96 | 16.05 | 15.25 | 16.39 | 16.29 | 16.50 | 16.12 | 16.24 |
| PBB-F             | BTP-ClBr2   | 16.99 | 17.00 | 14.73 | 16.01 | 16.08 | 16.63 | 17.55 | 16.24 |
| PBTA-PSF          | LL3         | 18.33 | 15.24 | 15.76 | 15.75 | 16.96 | 15.41 | 23.79 | 16.24 |
| W1                | Y6-Se       | 17.52 | 16.30 | 14.59 | 15.61 | 16.94 | 16.48 | 15.88 | 16.24 |
| PBDB-T-2Cl        | LL3         | 17.74 | 14.45 | 16.49 | 16.37 | 15.92 | 16.46 | 28.85 | 16.24 |
| PBT-SF            | N3          | 16.80 | 15.90 | 14.32 | 15.42 | 18.41 | 16.58 | 14.08 | 16.24 |
| PBDTS-TDZ         | A-WSSe-Cl   | 17.00 | 16.93 | 15.48 | 16.64 | 14.12 | 17.25 | 16.45 | 16.24 |
| J52-2Cl           | LL3         | 17.96 | 14.87 | 16.20 | 16.21 | 16.47 | 15.70 | 26.21 | 16.23 |
| PDTB-EF-T         | BTSe-4F     | 16.68 | 16.36 | 14.43 | 14.99 | 18.14 | 16.80 | 14.61 | 16.23 |
| J52-2F,J52-F,PFBZ | LL4         | 16.81 | 15.21 | 16.18 | 16.22 | 16.78 | 16.21 | 27.01 | 16.23 |
| PDBT-Cl           | AQx         | 17.02 | 16.33 | 14.87 | 15.71 | 16.83 | 16.64 | 14.88 | 16.23 |
| PTQ10,PTQ-10      | LL3         | 18.10 | 15.67 | 15.66 | 15.93 | 15.98 | 16.03 | 22.87 | 16.23 |
| PBCT-2F           | SY3         | 16.86 | 16.04 | 15.39 | 15.86 | 16.17 | 17.05 | 17.21 | 16.23 |
| L810              | LL3         | 17.95 | 14.88 | 16.19 | 16.20 | 16.47 | 15.68 | 26.19 | 16.23 |
| PBT-SF            | BTP-6F      | 16.73 | 15.57 | 13.95 | 15.87 | 18.65 | 16.59 | 13.80 | 16.23 |
| PBDTSF-TZNT       | LL4         | 17.42 | 15.14 | 15.49 | 15.88 | 16.87 | 16.56 | 24.74 | 16.23 |
| PBT1-EH           | BTP-S9      | 17.40 | 16.49 | 15.19 | 15.59 | 15.98 | 16.71 | 13.27 | 16.23 |
| TTFQx-T1          | LL4         | 16.80 | 15.35 | 15.90 | 16.00 | 16.42 | 16.88 | 26.04 | 16.23 |
| PBB-F             | BTP-ClBr1   | 16.82 | 17.16 | 14.51 | 16.16 | 16.05 | 16.65 | 17.58 | 16.22 |
| PBDB-T-2Cl        | BO-4Cl      | 16.50 | 16.26 | 15.40 | 16.34 | 16.21 | 16.63 | 16.03 | 16.22 |
| PBDB-T-2Cl        | BTIC-BO-4Br | 17.04 | 15.85 | 15.43 | 16.84 | 16.02 | 16.16 | 16.17 | 16.22 |
| PBCT-2F           | Y6-BO       | 17.85 | 16.86 | 14.60 | 15.34 | 15.53 | 17.14 | 17.84 | 16.22 |
| PBCT-2F           | Y12         | 17.85 | 16.86 | 14.60 | 15.34 | 15.53 | 17.14 | 17.84 | 16.22 |
| W1                | TB-4Cl      | 17.13 | 15.81 | 14.87 | 15.83 | 17.00 | 16.69 | 15.18 | 16.22 |
| PBDTS-TDZ         | BTP-ClBr    | 17.08 | 16.64 | 15.66 | 16.81 | 14.25 | 16.87 | 16.23 | 16.22 |
| D18               | Y22         | 16.95 | 16.62 | 14.46 | 14.87 | 18.60 | 15.82 | 16.78 | 16.22 |
| PBT-SF            | BTPPT-4F,Y6 | 16.67 | 15.96 | 14.46 | 15.28 | 18.29 | 16.66 | 14.01 | 16.22 |
| PBDTS-Se-TAZ      | LL3         | 18.59 | 15.61 | 15.75 | 15.53 | 16.22 | 15.61 | 22.38 | 16.22 |
| PBN-S             | Y26         | 17.68 | 15.76 | 14.73 | 14.67 | 18.01 | 16.45 | 15.46 | 16.22 |
| PBCT-2F           | ABP4T-4F    | 17.74 | 16.96 | 14.75 | 15.34 | 15.38 | 17.12 | 17.64 | 16.22 |
| TTFQx-T1          | BTP-ClBr2   | 16.97 | 15.90 | 15.08 | 15.86 | 16.36 | 17.14 | 15.17 | 16.22 |
| 2T-TTC-BDTFT      | BTP-S9      | 16.86 | 16.08 | 14.75 | 15.04 | 17.48 | 17.09 | 15.26 | 16.22 |
| PTO2              | BP5T-4F     | 17.41 | 15.42 | 14.84 | 15.31 | 18.05 | 16.26 | 16.38 | 16.21 |
| PDTB-EF-T         | BTP-2F-ThCl | 16.61 | 16.27 | 15.15 | 15.31 | 17.72 | 16.21 | 14.89 | 16.21 |
| PFBDB-T           | BO-4Cl      | 16.40 | 16.20 | 15.29 | 15.89 | 16.51 | 16.98 | 15.99 | 16.21 |
| D18               | AQx         | 16.58 | 16.83 | 14.40 | 15.84 | 17.74 | 15.88 | 16.08 | 16.21 |
| PBDB-T-2Cl        | BTP-4Cl,eC9 | 16.44 | 16.30 | 15.34 | 16.32 | 16.28 | 16.57 | 15.95 | 16.21 |
| PBDB-T-2Cl        | BTP-eC9     | 16.44 | 16.30 | 15.34 | 16.32 | 16.28 | 16.57 | 15.95 | 16.21 |
| PDBT-Cl           | Y11         | 17.16 | 16.03 | 14.56 | 15.28 | 17.56 | 16.66 | 15.95 | 16.21 |

|                  |                      |       |       |       |       |       |       |       |       |
|------------------|----------------------|-------|-------|-------|-------|-------|-------|-------|-------|
| TTFQx-T1         | BTP-CIBr1            | 16.84 | 15.95 | 14.95 | 15.93 | 16.35 | 17.23 | 15.13 | 16.21 |
| PBFTT            | BO-4Cl               | 17.36 | 15.54 | 14.84 | 16.29 | 17.12 | 16.08 | 15.89 | 16.21 |
| 2T-TTC-<br>BDTFT | Y19                  | 16.82 | 16.15 | 14.88 | 15.13 | 17.08 | 17.18 | 15.70 | 16.21 |
| PDBT-Cl          | Y18                  | 17.19 | 16.15 | 14.87 | 14.97 | 17.38 | 16.68 | 15.70 | 16.21 |
| PDBT-2F          | BTP-4Cl,eC9          | 16.59 | 15.61 | 14.46 | 17.05 | 17.26 | 16.27 | 14.82 | 16.21 |
| PDBT-2F          | BTP-eC9              | 16.59 | 15.61 | 14.46 | 17.05 | 17.26 | 16.27 | 14.82 | 16.21 |
| PFOPB            | TB-4Cl               | 17.08 | 16.13 | 15.14 | 15.92 | 16.82 | 16.13 | 15.69 | 16.20 |
| PDBT-2F          | BTP-CIBr             | 17.10 | 15.25 | 14.88 | 17.33 | 17.44 | 15.22 | 15.19 | 16.20 |
| PDTB-EF-T        | Y26                  | 17.01 | 16.24 | 14.40 | 14.46 | 18.63 | 16.48 | 14.21 | 16.20 |
| J62              | BO-4Cl               | 16.52 | 16.23 | 15.49 | 16.15 | 16.50 | 16.32 | 12.87 | 16.20 |
| PBDB-TSCL        | PTIC-4Cl             | 17.22 | 14.93 | 15.29 | 16.81 | 16.91 | 16.07 | 15.53 | 16.20 |
| PBCT-2F          | BTP-6F               | 17.70 | 16.77 | 14.41 | 15.45 | 15.90 | 16.97 | 17.89 | 16.20 |
| PBDTS-TDZ        | BTP-CIBr2            | 17.08 | 16.65 | 15.45 | 16.67 | 14.32 | 17.03 | 16.11 | 16.20 |
| PBB-F            | BTP-S2               | 17.17 | 16.85 | 14.63 | 16.18 | 16.20 | 16.16 | 17.43 | 16.20 |
| PDBT-Cl          | BTPTT-<br>4F,Y6      | 16.84 | 16.24 | 14.86 | 15.26 | 17.48 | 16.51 | 15.89 | 16.20 |
| PTO2             | Y6-BO                | 17.51 | 15.37 | 14.61 | 15.12 | 18.35 | 16.21 | 16.50 | 16.20 |
| PTO2             | Y12                  | 17.51 | 15.37 | 14.61 | 15.12 | 18.35 | 16.21 | 16.50 | 16.20 |
| P5T-2F           | LL3                  | 17.76 | 15.81 | 16.42 | 16.86 | 13.90 | 16.43 | 27.64 | 16.20 |
| D18              | BTP-6F               | 16.03 | 16.48 | 14.45 | 15.95 | 18.94 | 15.34 | 17.34 | 16.20 |
| P-FT             | LL4                  | 16.90 | 15.05 | 16.19 | 16.33 | 16.57 | 16.13 | 25.75 | 16.20 |
| PBCT-2F          | PTIC-4Cl             | 17.08 | 15.43 | 15.51 | 16.15 | 15.90 | 17.10 | 17.03 | 16.20 |
| J61              | A-WSSe-Cl            | 16.90 | 16.78 | 15.89 | 15.90 | 16.11 | 15.58 | 13.97 | 16.19 |
| PBZ-ClSi         | BTP-CIBr             | 16.28 | 15.09 | 16.63 | 17.00 | 16.27 | 15.88 | 14.99 | 16.19 |
| PFBDB-T          | BTP-eC9              | 16.34 | 16.26 | 15.24 | 15.87 | 16.53 | 16.92 | 15.91 | 16.19 |
| PFBDB-T          | BTP-4Cl,eC9          | 16.34 | 16.26 | 15.24 | 15.87 | 16.53 | 16.92 | 15.91 | 16.19 |
| PBDB-T-2Cl       | LL4                  | 16.93 | 14.97 | 16.34 | 16.34 | 16.26 | 16.31 | 28.37 | 16.19 |
| 2T-TTC-<br>BDTFT | BTP-S1               | 17.10 | 15.76 | 14.87 | 15.30 | 17.30 | 16.80 | 15.65 | 16.19 |
| 2T-TTC-<br>BDTFT | BTP-2F-<br>2Cl,SY2   | 16.92 | 16.06 | 14.74 | 14.78 | 17.48 | 17.14 | 15.21 | 16.19 |
| PBT-SF           | SY1                  | 16.53 | 16.16 | 14.79 | 15.28 | 18.13 | 16.23 | 14.88 | 16.19 |
| PDBT-Cl          | BTP-6F               | 16.73 | 16.43 | 14.44 | 15.76 | 17.30 | 16.45 | 16.06 | 16.19 |
| PTO2             | HDO-4Cl              | 17.04 | 15.10 | 14.70 | 15.70 | 17.64 | 16.94 | 16.98 | 16.19 |
| PBQx-TF          | Y12                  | 16.71 | 19.03 | 12.50 | 16.58 | 17.88 | 14.41 | 17.53 | 16.19 |
| PBQx-TF          | Y6-BO                | 16.71 | 19.03 | 12.50 | 16.58 | 17.88 | 14.41 | 17.53 | 16.19 |
| SZ5              | PT2IC-4Cl            | 16.64 | 15.37 | 15.34 | 16.24 | 16.84 | 16.69 | 16.18 | 16.19 |
| PDBT-Cl          | L8-BO                | 16.96 | 16.20 | 14.85 | 15.18 | 17.33 | 16.59 | 15.96 | 16.18 |
| SZ5              | Y6-2Se               | 16.26 | 16.43 | 15.00 | 15.75 | 17.51 | 16.14 | 16.16 | 16.18 |
| SZ5              | HDO-4Cl              | 16.72 | 15.63 | 14.81 | 15.90 | 17.06 | 16.97 | 16.75 | 16.18 |
| PE4              | LL3                  | 17.69 | 14.65 | 16.51 | 16.08 | 16.03 | 16.14 | 28.09 | 16.18 |
| PBT-SF           | BT-BO-<br>L4F,BTP-S7 | 16.39 | 16.24 | 14.46 | 15.40 | 18.15 | 16.45 | 14.41 | 16.18 |
| J62              | LL3-2Cl              | 16.77 | 16.40 | 15.42 | 15.69 | 16.45 | 16.36 | 12.99 | 16.18 |
| PBCT-2F          | L8-BO                | 17.76 | 17.07 | 14.73 | 14.96 | 15.36 | 17.21 | 17.62 | 16.18 |
| PBN-S            | BTIC-2Br-<br>m,TPT10 | 16.76 | 15.49 | 15.41 | 16.07 | 17.08 | 16.27 | 16.05 | 16.18 |
| PE4              | LL3-2Cl              | 16.47 | 15.90 | 15.24 | 15.89 | 17.16 | 16.38 | 15.67 | 16.17 |
| PDBT-Cl          | N3                   | 16.99 | 15.91 | 14.76 | 15.38 | 17.58 | 16.43 | 15.90 | 16.17 |
| PBT1-EH          | BTP-2F-<br>2Cl,SY2   | 17.47 | 16.60 | 15.21 | 15.45 | 15.71 | 16.60 | 13.14 | 16.17 |
| 2T-TTC-<br>BDTFT | CH1007               | 16.63 | 16.59 | 14.01 | 15.17 | 17.66 | 16.96 | 16.06 | 16.17 |

|                 |                      |       |       |       |       |       |       |       |       |
|-----------------|----------------------|-------|-------|-------|-------|-------|-------|-------|-------|
| J11             | LL3                  | 18.10 | 15.11 | 16.26 | 16.06 | 16.08 | 15.43 | 26.70 | 16.17 |
| PBDB-TSCl       | SY3                  | 16.92 | 15.42 | 15.17 | 16.50 | 17.06 | 15.95 | 15.69 | 16.17 |
| TTFQx-T1        | BTP-ClBr             | 16.96 | 15.83 | 15.30 | 15.93 | 16.36 | 16.65 | 15.33 | 16.17 |
| PBBSe-Cl        | S-WSeSe-Cl           | 16.41 | 17.07 | 15.20 | 16.76 | 15.54 | 16.04 | 16.54 | 16.17 |
| J61             | BTP-ClBr             | 17.00 | 16.32 | 16.00 | 16.07 | 16.09 | 15.51 | 14.01 | 16.17 |
| PBCT-2F         | N3                   | 17.76 | 16.67 | 14.74 | 15.13 | 15.66 | 17.04 | 17.63 | 16.17 |
| J62             | BTP-eC9              | 16.42 | 16.32 | 15.44 | 16.13 | 16.45 | 16.23 | 12.77 | 16.16 |
| J62             | BTP-4Cl,eC9          | 16.42 | 16.32 | 15.44 | 16.13 | 16.45 | 16.23 | 12.77 | 16.16 |
| PDBT-Cl         | PTIC-4Cl             | 16.83 | 15.14 | 15.20 | 16.38 | 16.96 | 16.48 | 15.74 | 16.16 |
| PFOPB           | SY3                  | 16.76 | 15.58 | 15.38 | 15.95 | 17.17 | 16.14 | 15.58 | 16.16 |
| BO2FC8          | BTP-FCl-FCI          | 16.33 | 16.06 | 15.64 | 15.06 | 17.37 | 16.51 | 14.91 | 16.16 |
| PBZ-ClSi        | BTP-ClBr2            | 16.34 | 15.02 | 16.47 | 16.95 | 16.45 | 15.74 | 14.75 | 16.16 |
| PFOPB           | BTP-FCl-FCI          | 17.21 | 16.14 | 15.23 | 15.75 | 17.16 | 15.47 | 15.64 | 16.16 |
| PBDTS-TDZ       | BTP-ClBr1            | 16.94 | 16.74 | 15.27 | 16.81 | 14.15 | 17.07 | 16.07 | 16.16 |
| PBFTT           | BTP-eC9              | 17.32 | 15.62 | 14.80 | 16.24 | 16.94 | 16.04 | 15.82 | 16.16 |
| PBFTT           | BTP-4Cl,eC9          | 17.32 | 15.62 | 14.80 | 16.24 | 16.94 | 16.04 | 15.82 | 16.16 |
| J52-Cl          | LL3                  | 17.89 | 14.66 | 16.11 | 16.17 | 16.34 | 15.79 | 26.16 | 16.16 |
| PTO2            | ABP4T-4F             | 17.40 | 15.39 | 14.76 | 15.09 | 18.17 | 16.14 | 16.29 | 16.16 |
| PBZ-ClSi        | LL4                  | 17.77 | 14.75 | 17.04 | 15.79 | 15.89 | 15.68 | 25.40 | 16.15 |
| P-4FP,P-FP      | LL3                  | 18.16 | 14.10 | 15.99 | 16.43 | 16.69 | 15.53 | 26.25 | 16.15 |
| PBFTT           | CH1007               | 17.01 | 16.69 | 15.09 | 16.00 | 16.40 | 15.69 | 16.69 | 16.15 |
| PBT1-EH         | TB-4Cl               | 17.30 | 16.30 | 15.29 | 15.98 | 15.35 | 16.67 | 13.92 | 16.15 |
| PBCT-2F         | Y18                  | 17.67 | 16.90 | 14.67 | 14.77 | 15.62 | 17.25 | 17.30 | 16.15 |
| PBQx-TF         | BT-BO-<br>L4F,BTP-S7 | 16.87 | 18.64 | 12.32 | 16.46 | 17.65 | 14.94 | 17.33 | 16.15 |
| PBQx-TF         | AQx                  | 16.75 | 19.54 | 12.02 | 16.76 | 17.35 | 14.45 | 16.25 | 16.15 |
| PBQ-4F          | S-WSeSe-Cl           | 16.95 | 15.79 | 15.26 | 15.33 | 16.37 | 17.17 | 16.28 | 16.14 |
| PE4             | LL4                  | 16.85 | 15.06 | 16.37 | 16.08 | 16.50 | 16.00 | 27.64 | 16.14 |
| PBDB-T-2Cl      | LL3-2Cl              | 16.60 | 16.28 | 15.32 | 15.86 | 16.19 | 16.63 | 15.98 | 16.14 |
| D18             | BTIC-2Br-<br>m,TPT10 | 16.29 | 15.87 | 15.54 | 15.75 | 17.15 | 16.26 | 16.88 | 16.14 |
| PBN-S           | BTDTTP-4F            | 17.30 | 15.51 | 14.98 | 15.42 | 17.21 | 16.43 | 15.37 | 16.14 |
| PBDT-3TCO       | LL3                  | 17.76 | 14.29 | 15.72 | 16.06 | 16.96 | 16.07 | 29.14 | 16.14 |
| PBDTSF-<br>TZNT | BTP-ClBr             | 16.46 | 15.08 | 15.25 | 17.20 | 16.45 | 16.42 | 15.17 | 16.14 |
| PBB-F           | BO-4Cl               | 16.67 | 16.88 | 14.86 | 15.62 | 16.13 | 16.70 | 17.47 | 16.14 |
| PFBDB-T         | BTP-S1               | 16.48 | 16.37 | 15.34 | 15.52 | 16.61 | 16.52 | 15.98 | 16.14 |
| PFBDB-T         | LL3-2Cl              | 16.51 | 16.24 | 15.21 | 15.43 | 16.47 | 16.97 | 15.94 | 16.14 |
| PBDTSF-<br>TZNT | A-WSeSe-Cl           | 16.52 | 14.96 | 15.07 | 17.06 | 16.37 | 16.87 | 15.20 | 16.14 |
| PBQx-TF         | BP5T-4F              | 16.61 | 19.33 | 12.25 | 16.85 | 17.59 | 14.18 | 17.39 | 16.14 |
| PBCT-2F         | Y11                  | 17.50 | 16.92 | 14.50 | 15.10 | 15.48 | 17.32 | 17.54 | 16.14 |
| PDBT-F          | BTDTTP-4F            | 17.55 | 15.24 | 15.04 | 15.36 | 17.31 | 16.30 | 15.50 | 16.14 |
| BO2FC8          | TB-4Cl               | 16.54 | 16.06 | 15.30 | 15.30 | 16.77 | 16.85 | 15.23 | 16.14 |
| PFOPB           | PT2IC-4Cl            | 16.83 | 15.04 | 15.53 | 16.42 | 16.89 | 16.08 | 15.46 | 16.13 |
| PBZ-ClSi        | A-WSeSe-Cl           | 16.36 | 14.90 | 16.54 | 16.97 | 16.13 | 15.90 | 15.14 | 16.13 |
| PFBDB-T         | CH1007               | 15.99 | 17.15 | 14.63 | 15.50 | 16.85 | 16.66 | 16.86 | 16.13 |
| PTO2            | PT2IC-4Cl            | 16.75 | 14.72 | 15.18 | 16.02 | 17.37 | 16.74 | 16.31 | 16.13 |
| PBDB-T-2Cl      | BTP-S9               | 16.31 | 16.25 | 15.37 | 15.79 | 16.64 | 16.41 | 15.67 | 16.13 |
| PBT-SF          | Y22                  | 16.84 | 16.21 | 14.22 | 14.69 | 18.29 | 16.52 | 14.07 | 16.13 |
| J61             | BTP-ClBr2            | 17.05 | 16.42 | 15.81 | 15.97 | 16.16 | 15.36 | 13.67 | 16.13 |

|                   |                  |       |       |       |       |       |       |       |       |
|-------------------|------------------|-------|-------|-------|-------|-------|-------|-------|-------|
| P-CIT             | LL3              | 17.98 | 14.51 | 16.17 | 16.22 | 16.26 | 15.63 | 24.98 | 16.13 |
| PTO2              | N3               | 17.45 | 15.23 | 14.73 | 14.88 | 18.41 | 16.07 | 16.28 | 16.13 |
| PBB-F             | LL3-2Cl          | 16.77 | 17.04 | 14.64 | 15.56 | 16.01 | 16.73 | 17.19 | 16.13 |
| PBB-F             | BTIC-BO-4Br      | 17.08 | 17.10 | 13.69 | 16.45 | 15.91 | 16.51 | 17.59 | 16.12 |
| PBDB-TSCl         | BPS-4F           | 16.57 | 15.66 | 15.35 | 16.70 | 17.26 | 15.20 | 16.27 | 16.12 |
| HFQx-T            | LL3              | 17.49 | 14.40 | 15.67 | 16.03 | 16.62 | 16.54 | 25.18 | 16.12 |
| SM1-F             | LL3              | 17.80 | 15.22 | 15.60 | 15.51 | 16.30 | 16.33 | 27.34 | 16.12 |
| PBDB-TSCl         | BP5T-4F          | 17.44 | 14.73 | 14.94 | 16.14 | 17.30 | 16.20 | 15.39 | 16.12 |
| TPD-3F            | HDO-4Cl          | 16.98 | 15.85 | 15.29 | 14.79 | 17.19 | 16.64 | 15.08 | 16.12 |
| PBDB-T-SF         | BTP-2F-ThCl      | 16.50 | 15.95 | 15.35 | 15.73 | 17.35 | 15.85 | 15.51 | 16.12 |
| PDBT-F            | BTN-4F           | 17.54 | 15.58 | 15.10 | 14.50 | 17.78 | 16.23 | 15.30 | 16.12 |
| PBDB-T-2Cl        | CH1007           | 15.86 | 17.07 | 15.14 | 16.00 | 16.34 | 16.31 | 16.88 | 16.12 |
| PDBT-2F           | LL3-2Cl          | 16.57 | 15.66 | 14.44 | 16.42 | 17.27 | 16.34 | 14.87 | 16.12 |
| SZ5               | PTIC-4Cl         | 16.74 | 15.29 | 15.21 | 16.08 | 16.82 | 16.55 | 16.07 | 16.12 |
| PBCT-2F           | Y6-2Se           | 17.15 | 17.30 | 14.86 | 15.82 | 14.81 | 16.76 | 17.31 | 16.12 |
| PBDTSF-TZNT       | BTP-ClBr2        | 16.47 | 14.92 | 14.95 | 17.09 | 16.62 | 16.64 | 14.86 | 16.12 |
| PTO2              | L8-BO            | 17.42 | 15.64 | 14.75 | 14.75 | 17.84 | 16.30 | 16.28 | 16.12 |
| W1                | Y6-2Se           | 16.16 | 16.55 | 14.81 | 15.78 | 17.19 | 16.20 | 14.80 | 16.12 |
| SM1-S             | LL3              | 18.12 | 15.74 | 15.22 | 15.39 | 16.05 | 16.18 | 23.66 | 16.11 |
| PBTA-PSF          | S-WSeSe-Cl       | 16.20 | 16.65 | 14.93 | 16.90 | 16.22 | 15.78 | 15.07 | 16.11 |
| PBDB-T-2Cl        | BTP-S1           | 16.55 | 16.17 | 15.70 | 15.98 | 16.10 | 16.18 | 16.02 | 16.11 |
| PDTB-EF-T         | BTIC-2Br-m,TPT10 | 16.31 | 15.55 | 15.19 | 15.85 | 17.35 | 16.41 | 15.77 | 16.11 |
| PDBT-Cl           | SY3              | 16.58 | 15.62 | 15.08 | 16.06 | 17.10 | 16.24 | 15.78 | 16.11 |
| PFBDB-T           | BTP-S9           | 16.32 | 16.27 | 15.23 | 15.32 | 16.74 | 16.78 | 15.64 | 16.11 |
| TPD-3F            | SY3              | 16.85 | 16.02 | 15.44 | 14.66 | 17.23 | 16.46 | 14.93 | 16.11 |
| J52-2F,J52-F,PFBZ | BO-4Cl           | 16.22 | 15.58 | 15.22 | 16.40 | 16.72 | 16.51 | 15.25 | 16.11 |
| D18               | BTSe-4F          | 15.96 | 16.68 | 14.28 | 15.17 | 18.34 | 16.21 | 16.91 | 16.11 |
| PBDB-T-2Cl        | Y19              | 16.49 | 16.32 | 15.27 | 15.74 | 16.22 | 16.56 | 15.92 | 16.10 |
| W1                | PT2IC-4Cl        | 16.60 | 14.74 | 15.26 | 16.28 | 17.08 | 16.64 | 15.00 | 16.10 |
| PTO2              | BTPTT-4F,Y6      | 17.33 | 15.40 | 14.72 | 14.78 | 18.25 | 16.11 | 16.26 | 16.10 |
| P5T-2F            | A-WSe-Cl         | 15.75 | 17.29 | 15.79 | 17.32 | 13.96 | 16.47 | 16.46 | 16.10 |
| PFOPB             | HDO-4Cl          | 16.87 | 15.48 | 15.09 | 16.09 | 16.98 | 16.07 | 16.12 | 16.10 |
| PTO2              | Y18              | 17.55 | 15.45 | 14.69 | 14.56 | 18.03 | 16.31 | 16.02 | 16.10 |
| PFBDB-T           | BTP-2F-2Cl,SY2   | 16.35 | 16.47 | 15.24 | 15.02 | 16.67 | 16.84 | 15.64 | 16.10 |
| J61               | BTP-ClBr1        | 16.95 | 16.63 | 15.65 | 16.07 | 16.07 | 15.21 | 13.67 | 16.10 |
| PBN-S             | AQx-2            | 16.84 | 15.88 | 14.88 | 15.34 | 16.76 | 16.87 | 15.25 | 16.09 |
| W1                | HDO-4Cl          | 16.92 | 15.11 | 14.73 | 15.96 | 17.10 | 16.75 | 15.66 | 16.09 |
| PBB-F             | BTP-eC9          | 16.60 | 16.91 | 14.70 | 15.63 | 16.11 | 16.62 | 17.41 | 16.09 |
| PBB-F             | BTP-4Cl,eC9      | 16.60 | 16.91 | 14.70 | 15.63 | 16.11 | 16.62 | 17.41 | 16.09 |
| SZ5               | SY3              | 16.53 | 15.73 | 15.10 | 15.77 | 17.00 | 16.43 | 16.13 | 16.09 |
| J62               | Y19              | 16.58 | 16.48 | 15.36 | 15.54 | 16.33 | 16.26 | 12.92 | 16.09 |
| PTO2              | SY3              | 16.68 | 15.24 | 14.98 | 15.53 | 17.57 | 16.56 | 16.37 | 16.09 |
| SZ5               | BP5T-4F          | 16.42 | 15.75 | 14.97 | 15.52 | 17.25 | 16.65 | 16.36 | 16.09 |
| PBQx-TF           | ABP4T-4F         | 16.55 | 19.22 | 12.27 | 16.59 | 17.69 | 14.24 | 17.32 | 16.09 |
| PDBT-F            | Y26              | 17.56 | 15.51 | 14.71 | 14.50 | 18.16 | 16.10 | 15.67 | 16.09 |
| PE4               | Y19              | 16.34 | 15.97 | 15.19 | 15.81 | 16.90 | 16.33 | 15.59 | 16.09 |

|              |                  |       |       |       |       |       |       |       |       |
|--------------|------------------|-------|-------|-------|-------|-------|-------|-------|-------|
| 2T-TTC-BDTFT | TB-4Cl           | 16.77 | 16.03 | 14.69 | 14.98 | 17.07 | 17.01 | 15.43 | 16.09 |
| TPD-3F       | PT2IC-4Cl        | 16.94 | 15.38 | 15.55 | 15.12 | 16.96 | 16.59 | 14.60 | 16.09 |
| PTO2         | BTP-6F           | 17.21 | 15.11 | 14.42 | 15.26 | 18.71 | 15.83 | 16.47 | 16.09 |
| PDBT-Cl      | BTIC-2Cl-yCF3    | 16.97 | 16.31 | 14.73 | 15.43 | 16.87 | 16.23 | 15.85 | 16.09 |
| BO2FC8       | SY1              | 16.59 | 16.10 | 15.49 | 14.65 | 17.26 | 16.45 | 14.84 | 16.09 |
| PE4          | BTP-2F-2Cl,SY2   | 16.02 | 16.05 | 15.33 | 15.64 | 17.32 | 16.18 | 15.03 | 16.09 |
| P-4FP,P-FP   | S-WSeSe-Cl       | 16.49 | 16.05 | 15.27 | 16.53 | 16.16 | 16.03 | 16.11 | 16.09 |
| PBDB-T-2Cl   | BTP-2F-2Cl,SY2   | 16.31 | 16.36 | 15.40 | 15.48 | 16.51 | 16.46 | 15.67 | 16.09 |
| SZ5          | SY1              | 16.83 | 15.85 | 15.17 | 15.11 | 17.40 | 16.17 | 16.06 | 16.09 |
| HFQx-T       | S-WSeSe-Cl       | 16.88 | 16.11 | 15.06 | 15.87 | 15.85 | 16.75 | 15.58 | 16.09 |
| PFBDB-T      | Y19              | 16.40 | 16.31 | 15.15 | 15.33 | 16.45 | 16.90 | 15.88 | 16.09 |
| PTO2         | Y11              | 17.40 | 15.43 | 14.53 | 14.78 | 17.95 | 16.44 | 16.33 | 16.09 |
| D18          | Y6-1O            | 16.18 | 16.52 | 14.44 | 15.22 | 18.64 | 15.50 | 17.16 | 16.08 |
| PBT1-EH      | PT2IC-4Cl        | 17.02 | 15.37 | 15.69 | 16.31 | 15.44 | 16.66 | 13.70 | 16.08 |
| PDBT-Cl      | BT-BO-L4F,BTP-S7 | 16.94 | 15.70 | 14.87 | 15.51 | 17.36 | 16.11 | 16.00 | 16.08 |
| PE4          | BTP-S9           | 15.85 | 15.99 | 15.30 | 15.98 | 17.25 | 16.12 | 15.10 | 16.08 |
| PDTB-EF-T    | BTDTP-4F         | 16.49 | 15.98 | 14.62 | 15.17 | 17.82 | 16.42 | 14.17 | 16.08 |
| J52-2Cl      | LL4              | 16.90 | 15.35 | 16.02 | 16.19 | 16.50 | 15.52 | 25.70 | 16.08 |
| J11          | S-WSeSe-Cl       | 15.77 | 16.42 | 15.65 | 16.93 | 15.87 | 15.84 | 16.33 | 16.08 |
| W1           | BP5T-4F          | 17.07 | 16.31 | 14.74 | 15.57 | 16.95 | 15.84 | 14.04 | 16.08 |
| PDBT-Cl      | SY1              | 17.00 | 15.78 | 15.07 | 15.36 | 17.35 | 15.92 | 15.69 | 16.08 |
| PBT1-EH      | BTP-S1           | 17.63 | 16.32 | 15.29 | 16.35 | 14.76 | 16.11 | 14.02 | 16.08 |
| PTO2         | SY1              | 17.08 | 15.41 | 15.05 | 14.86 | 17.76 | 16.28 | 16.20 | 16.07 |
| J101         | LL3              | 19.36 | 13.35 | 17.29 | 15.78 | 14.51 | 16.15 | 24.64 | 16.07 |
| PBDT-3TCO    | LL4              | 16.96 | 14.89 | 15.54 | 16.03 | 17.21 | 15.81 | 28.64 | 16.07 |
| PBDTS-TDZ    | LL4              | 17.45 | 16.53 | 15.98 | 15.56 | 13.84 | 17.07 | 26.28 | 16.07 |
| TTFQx-T1     | BO-4Cl           | 16.57 | 15.73 | 14.93 | 15.59 | 16.18 | 17.42 | 15.03 | 16.07 |
| W1           | SY3              | 16.51 | 15.30 | 15.01 | 15.78 | 17.33 | 16.49 | 15.22 | 16.07 |
| PTO2         | BTIC-2Cl-yCF3    | 17.11 | 15.85 | 14.52 | 14.95 | 17.53 | 16.45 | 16.53 | 16.07 |
| PBDTS-TDZ    | BTIC-BO-4Br      | 17.21 | 16.66 | 14.60 | 17.02 | 14.06 | 16.86 | 16.13 | 16.07 |
| J52-2Cl      | S-WSeSe-Cl       | 16.08 | 15.83 | 15.58 | 16.58 | 16.29 | 16.05 | 16.16 | 16.07 |
| L810         | LL4              | 16.88 | 15.36 | 16.02 | 16.18 | 16.48 | 15.50 | 25.69 | 16.07 |
| W1           | BTIC-2Cl-yCF3    | 16.66 | 16.46 | 14.52 | 15.22 | 17.15 | 16.39 | 14.86 | 16.07 |
| PBDT-S-2TC   | LL3              | 18.27 | 15.85 | 15.81 | 15.09 | 15.08 | 16.30 | 23.07 | 16.07 |
| W1           | Y12              | 17.19 | 16.33 | 14.48 | 15.38 | 17.11 | 15.90 | 14.20 | 16.07 |
| W1           | Y6-BO            | 17.19 | 16.33 | 14.48 | 15.38 | 17.11 | 15.90 | 14.20 | 16.07 |
| PBN-S        | MS-4Cl           | 16.50 | 14.00 | 15.23 | 16.73 | 16.83 | 17.10 | 15.58 | 16.07 |
| PTO2         | PTIC-4Cl         | 16.90 | 14.61 | 15.07 | 15.86 | 17.33 | 16.62 | 16.18 | 16.06 |
| PDBT-2F      | CH1007           | 16.22 | 15.61 | 14.66 | 16.79 | 17.51 | 15.59 | 15.25 | 16.06 |
| P-FT         | A-WSSe-Cl        | 16.33 | 15.65 | 15.55 | 15.93 | 16.46 | 16.46 | 15.28 | 16.06 |
| SZ5          | Y11              | 17.05 | 15.78 | 14.64 | 15.03 | 17.28 | 16.59 | 16.31 | 16.06 |
| PBDTSF-TZNT  | BTP-ClBr1        | 16.51 | 14.90 | 14.75 | 17.20 | 16.41 | 16.61 | 14.83 | 16.06 |
| PBDB-TSCl    | L8-BO            | 17.38 | 15.40 | 14.83 | 15.58 | 17.21 | 15.97 | 15.36 | 16.06 |
| PBDT-3TCO    | A-WSSe-Cl        | 16.85 | 16.55 | 14.97 | 14.73 | 17.16 | 16.11 | 17.12 | 16.06 |
| PDBT-Cl      | Y22              | 17.27 | 15.88 | 14.67 | 14.71 | 17.54 | 16.30 | 15.62 | 16.06 |



|                        |                      |       |       |       |       |       |       |       |       |
|------------------------|----------------------|-------|-------|-------|-------|-------|-------|-------|-------|
| P-FT                   | BTP-S2               | 16.71 | 15.05 | 15.82 | 16.11 | 16.59 | 16.07 | 15.02 | 16.06 |
| 2T-TTC-<br>BDTFT<br>W1 | BTP-FCI-FCI<br>SY1   | 16.72 | 15.82 | 14.75 | 14.63 | 17.44 | 16.99 | 15.08 | 16.06 |
| PFOPB                  | PTIC-4Cl             | 16.65 | 15.94 | 14.98 | 15.11 | 17.39 | 16.28 | 14.79 | 16.06 |
| J52-2F,J52-<br>F,PFBZ  | BTP-eC9              | 16.91 | 14.90 | 15.42 | 16.27 | 16.79 | 16.05 | 15.35 | 16.06 |
| J52-2F,J52-<br>F,PFBZ  | BTP-4Cl,eC9          | 16.11 | 15.65 | 15.17 | 16.36 | 16.59 | 16.47 | 15.15 | 16.06 |
| PBDB-TSCl              | SY1                  | 16.11 | 15.65 | 15.17 | 16.36 | 16.59 | 16.47 | 15.15 | 16.06 |
| PBT-Cl                 | LL3                  | 17.05 | 15.53 | 15.10 | 15.65 | 17.38 | 15.64 | 15.46 | 16.06 |
| PBN-S                  | Y9-2Br               | 17.58 | 15.41 | 16.46 | 16.22 | 14.14 | 16.52 | 26.22 | 16.06 |
| PBQx-TF                | BTP-6F               | 16.71 | 15.23 | 15.44 | 15.88 | 16.76 | 16.30 | 15.71 | 16.05 |
| PBDB-TSCl              | Y6-BO                | 16.15 | 19.45 | 12.37 | 16.78 | 17.73 | 13.84 | 17.41 | 16.05 |
| PBDB-TSCl              | Y12                  | 17.52 | 14.86 | 14.57 | 15.88 | 17.63 | 15.86 | 15.56 | 16.05 |
| PBFTT                  | BTP-2F-<br>2Cl,SY2   | 17.52 | 14.86 | 14.57 | 15.88 | 17.63 | 15.86 | 15.56 | 16.05 |
| PBQx-TF                | Y18                  | 17.38 | 16.19 | 14.88 | 15.30 | 16.85 | 15.73 | 15.54 | 16.05 |
| PBT1-EH                | CH1007               | 17.08 | 19.11 | 12.06 | 16.07 | 17.64 | 14.38 | 17.04 | 16.05 |
| PBZ-ClSi               | BTP-ClBr1            | 17.41 | 17.02 | 14.22 | 15.69 | 15.26 | 16.72 | 13.80 | 16.05 |
| D18                    | Y26                  | 16.38 | 14.83 | 16.33 | 17.02 | 16.24 | 15.52 | 14.72 | 16.05 |
| PBB-F                  | Y19                  | 16.81 | 16.27 | 14.41 | 14.54 | 18.69 | 15.59 | 16.67 | 16.05 |
| PBQx-TF                | L8-BO                | 16.67 | 17.08 | 14.47 | 15.47 | 15.97 | 16.65 | 17.15 | 16.05 |
| J61                    | BTIC-BO-<br>4Br      | 16.61 | 19.21 | 12.19 | 16.26 | 17.57 | 14.46 | 17.31 | 16.05 |
| J62                    | BTP-S9               | 17.22 | 16.47 | 15.34 | 16.27 | 15.95 | 15.04 | 13.79 | 16.05 |
| PDBT-2F                | Y19                  | 16.08 | 16.75 | 15.36 | 15.61 | 16.52 | 15.97 | 11.73 | 16.05 |
| PFOPB                  | SY1                  | 16.49 | 15.67 | 14.41 | 16.33 | 17.07 | 16.31 | 14.80 | 16.05 |
| PTQ10,PTQ-<br>10       | LL4                  | 17.11 | 15.86 | 15.08 | 15.25 | 17.12 | 15.85 | 15.31 | 16.05 |
| L810                   | S-WSeSe-Cl           | 16.94 | 16.25 | 15.35 | 15.90 | 16.00 | 15.84 | 22.33 | 16.05 |
| J61                    | BTP-S2               | 16.05 | 15.83 | 15.58 | 16.53 | 16.26 | 16.03 | 16.15 | 16.05 |
| PTO2                   | BT-BO-<br>L4F,BTP-S7 | 17.20 | 16.29 | 15.86 | 16.13 | 16.06 | 14.75 | 13.83 | 16.05 |
| P-FT                   | BTIC-BO-<br>4Br      | 17.17 | 15.27 | 14.85 | 15.01 | 17.75 | 16.22 | 16.43 | 16.05 |
| 2T-TTC-<br>BDTFT       | PT2IC-4Cl            | 16.43 | 15.55 | 15.19 | 16.28 | 16.77 | 16.03 | 15.02 | 16.04 |
| PDBT-F                 | BTIC-2Br-<br>m,TPT10 | 16.53 | 15.24 | 15.11 | 15.44 | 16.91 | 17.01 | 15.29 | 16.04 |
| PDBT-F                 | AQx-2                | 16.47 | 15.65 | 15.31 | 15.79 | 17.13 | 15.89 | 15.72 | 16.04 |
| PBQ-4F                 | BTP-S2               | 16.78 | 15.85 | 14.86 | 15.12 | 16.86 | 16.76 | 15.19 | 16.04 |
| BO2FC8                 | PT2IC-4Cl            | 17.06 | 15.03 | 15.21 | 15.38 | 16.66 | 16.87 | 15.24 | 16.04 |
| PBT-SF                 | BTP-2F-<br>ThCl      | 16.32 | 15.10 | 15.69 | 15.75 | 16.53 | 16.82 | 15.07 | 16.03 |
| TPD-3F                 | Y6-Se                | 16.31 | 16.16 | 14.76 | 15.30 | 17.72 | 15.96 | 14.51 | 16.03 |
| J52-Cl                 | S-WSeSe-Cl           | 17.58 | 17.51 | 12.98 | 14.33 | 17.37 | 16.43 | 15.36 | 16.03 |
| PBDB-T-SF              | Y26                  | 15.99 | 15.75 | 15.49 | 16.56 | 16.38 | 16.03 | 15.96 | 16.03 |
| D18                    | MS-4Cl               | 16.87 | 15.79 | 14.68 | 14.82 | 18.27 | 15.77 | 15.33 | 16.03 |
| PBDB-TSCl              | Y11                  | 16.27 | 14.43 | 15.40 | 16.33 | 17.15 | 16.61 | 16.60 | 16.03 |
| PBT-SF                 | BTSe-4F              | 17.43 | 15.20 | 14.51 | 15.61 | 17.40 | 16.04 | 15.52 | 16.03 |
| PBT1-EH                | BTP-FCI-FCI          | 16.18 | 15.99 | 14.62 | 15.05 | 17.82 | 16.52 | 14.31 | 16.03 |
| PDBT-Cl                | BTP-2F-<br>ThCl      | 17.38 | 16.37 | 15.18 | 15.29 | 15.58 | 16.38 | 12.93 | 16.03 |
| SZ5                    | Y12                  | 17.06 | 15.87 | 15.18 | 15.34 | 16.95 | 15.78 | 15.53 | 16.03 |
| SZ5                    | Y6-BO                | 16.52 | 15.68 | 14.71 | 15.32 | 17.53 | 16.42 | 16.52 | 16.03 |
| SZ5                    | Y6-BO                | 16.52 | 15.68 | 14.71 | 15.32 | 17.53 | 16.42 | 16.52 | 16.03 |

|                       |                      |       |       |       |       |       |       |       |       |
|-----------------------|----------------------|-------|-------|-------|-------|-------|-------|-------|-------|
| PBDB-TSCl             | BTIC-2Cl-<br>yCF3    | 17.09 | 15.57 | 14.81 | 15.87 | 16.92 | 15.92 | 15.63 | 16.03 |
| D18                   | AQx-2                | 16.74 | 16.45 | 14.48 | 15.07 | 17.52 | 15.91 | 16.31 | 16.03 |
| PBZ-CISi              | BTIC-BO-<br>4Br      | 16.72 | 14.78 | 15.88 | 17.15 | 16.29 | 15.35 | 14.80 | 16.03 |
| J52-Cl                | LL4                  | 16.86 | 15.17 | 15.95 | 16.15 | 16.42 | 15.62 | 25.66 | 16.03 |
| PBDTS-TDZ             | LL3-2Cl              | 16.87 | 16.65 | 15.23 | 16.40 | 13.84 | 17.19 | 15.86 | 16.03 |
| PBDTS-TDZ             | BO-4Cl               | 16.76 | 16.49 | 15.45 | 16.33 | 13.97 | 17.17 | 15.98 | 16.03 |
| PDBT-Cl               | Y6-1O                | 16.76 | 15.99 | 14.40 | 15.04 | 17.51 | 16.46 | 15.98 | 16.03 |
| PBCT-2F               | AQx                  | 17.67 | 16.98 | 14.61 | 15.49 | 14.17 | 17.24 | 16.44 | 16.03 |
| J52-2F,J52-<br>F,PFBZ | LL3-2Cl              | 16.28 | 15.81 | 15.15 | 15.80 | 16.59 | 16.52 | 15.15 | 16.03 |
| PBDTS-Se-<br>TAZ      | S-WSeSe-Cl           | 16.28 | 16.72 | 14.97 | 16.65 | 15.64 | 15.89 | 13.88 | 16.03 |
| W1                    | L8-BO                | 17.09 | 16.58 | 14.64 | 15.02 | 16.82 | 16.00 | 14.05 | 16.02 |
| BO2FC8                | SY3                  | 16.29 | 15.58 | 15.47 | 15.34 | 16.78 | 16.68 | 15.27 | 16.02 |
| PBQx-TF               | BTP-2F-<br>ThCl      | 16.79 | 17.79 | 13.37 | 16.38 | 17.46 | 14.34 | 16.95 | 16.02 |
| PDBT-2F               | BTP-2F-<br>2Cl,SY2   | 16.78 | 15.48 | 14.48 | 16.16 | 17.24 | 16.00 | 14.33 | 16.02 |
| PBDB-TSCl             | AQx                  | 17.34 | 14.91 | 14.86 | 16.11 | 16.89 | 16.03 | 14.61 | 16.02 |
| W1                    | BT-BO-<br>L4F,BTP-S7 | 16.70 | 16.27 | 14.72 | 15.26 | 16.98 | 16.20 | 14.17 | 16.02 |
| PBBSe-Cl              | LL3                  | 17.56 | 14.78 | 15.88 | 16.48 | 15.73 | 15.69 | 27.35 | 16.02 |
| PBT1-EH               | SY3                  | 16.97 | 15.83 | 15.56 | 15.75 | 15.47 | 16.53 | 14.06 | 16.02 |
| TPD-3F                | PTIC-4Cl             | 17.01 | 15.22 | 15.49 | 14.99 | 16.92 | 16.49 | 14.49 | 16.02 |
| 2T-TTC-<br>BDTFT      | HDO-4Cl              | 16.57 | 15.49 | 14.66 | 15.08 | 17.10 | 17.21 | 15.80 | 16.02 |
| TTFQx-T1              | BTP-eC9              | 16.48 | 15.77 | 14.88 | 15.57 | 16.03 | 17.38 | 14.95 | 16.02 |
| TTFQx-T1              | BTP-4Cl,eC9          | 16.48 | 15.77 | 14.88 | 15.57 | 16.03 | 17.38 | 14.95 | 16.02 |
| PDTB-EF-T             | AQx-2                | 16.14 | 16.26 | 14.56 | 15.10 | 17.23 | 16.82 | 14.41 | 16.02 |
| PBDB-T-2Cl            | TB-4Cl               | 16.38 | 16.34 | 15.09 | 15.63 | 16.26 | 16.39 | 15.68 | 16.02 |
| W1                    | Y11                  | 17.06 | 16.45 | 14.40 | 15.03 | 16.95 | 16.20 | 14.44 | 16.02 |
| PBDB-TSCl             | ABP4T-4F             | 17.38 | 14.75 | 14.76 | 15.88 | 17.44 | 15.88 | 15.34 | 16.02 |
| PBCT-2F               | SY1                  | 17.06 | 16.39 | 15.29 | 15.18 | 15.25 | 16.92 | 17.11 | 16.01 |
| W1                    | ABP4T-4F             | 17.05 | 16.31 | 14.61 | 15.36 | 16.96 | 15.80 | 13.96 | 16.01 |
| PDTB-EF-T             | MS-4Cl               | 16.39 | 14.10 | 15.01 | 16.34 | 17.12 | 17.11 | 15.25 | 16.01 |
| PBDT-3TCO             | BTP-ClBr             | 17.03 | 15.95 | 15.15 | 14.98 | 17.10 | 15.86 | 16.84 | 16.01 |
| BO2FC8                | HDO-4Cl              | 16.36 | 15.41 | 15.18 | 15.45 | 16.73 | 16.94 | 15.55 | 16.01 |
| PTO2                  | AQx                  | 17.42 | 15.50 | 14.62 | 15.20 | 17.01 | 16.32 | 15.28 | 16.01 |
| PBT1-EH               | PTIC-4Cl             | 17.10 | 15.26 | 15.59 | 16.18 | 15.37 | 16.56 | 13.61 | 16.01 |
| PFOPB                 | Y6-2Se               | 16.43 | 16.57 | 14.08 | 15.93 | 17.13 | 15.92 | 15.40 | 16.01 |
| P-FT                  | BTP-ClBr1            | 16.26 | 15.54 | 15.35 | 16.06 | 16.62 | 16.22 | 14.95 | 16.01 |
| P-FT                  | BTP-ClBr             | 16.30 | 15.44 | 15.70 | 16.06 | 16.61 | 15.95 | 15.16 | 16.01 |
| TTFQx-T1              | LL3-2Cl              | 16.63 | 15.88 | 14.86 | 15.19 | 16.07 | 17.44 | 14.85 | 16.01 |
| PBCT-2F               | Y22                  | 17.68 | 16.78 | 14.62 | 14.54 | 15.43 | 17.01 | 17.22 | 16.01 |
| D18                   | Y9-2Br               | 16.40 | 15.65 | 15.59 | 15.50 | 16.51 | 16.40 | 16.75 | 16.01 |
| W1                    | BPS-4F               | 16.19 | 16.31 | 14.65 | 16.10 | 16.80 | 16.00 | 15.23 | 16.01 |
| PBDB-T-SF             | MS-4Cl               | 16.36 | 14.05 | 15.13 | 16.76 | 17.21 | 16.54 | 15.40 | 16.01 |
| PBQx-TF               | Y22                  | 17.08 | 18.82 | 12.13 | 15.78 | 17.75 | 14.49 | 16.95 | 16.01 |
| P5T-2F                | LL4                  | 16.64 | 16.25 | 16.18 | 16.83 | 13.89 | 16.24 | 27.15 | 16.01 |
| PBQ-4F                | A-WSSe-Cl            | 16.66 | 15.52 | 15.08 | 15.16 | 16.40 | 17.21 | 15.54 | 16.01 |
| SZ5                   | BT-BO-<br>L4F,BTP-S7 | 16.62 | 15.63 | 14.92 | 15.24 | 17.41 | 16.22 | 16.35 | 16.01 |

|                      |                  |       |       |       |       |       |       |       |       |
|----------------------|------------------|-------|-------|-------|-------|-------|-------|-------|-------|
| TPD-3F               | SY1              | 17.19 | 16.70 | 14.38 | 13.99 | 17.46 | 16.30 | 14.45 | 16.01 |
| J52-2F,J52-F,PFBZ    | BTP-S1           | 16.27 | 15.92 | 15.51 | 15.97 | 16.46 | 15.91 | 15.11 | 16.00 |
| PBFTT                | LL3-2Cl          | 17.15 | 15.68 | 14.78 | 15.54 | 16.78 | 16.09 | 15.76 | 16.00 |
| PBT1-EH              | HDO-4Cl          | 17.06 | 15.71 | 15.30 | 15.79 | 15.44 | 16.72 | 14.15 | 16.00 |
| PTBB-m               | LL3              | 17.36 | 15.70 | 15.52 | 16.94 | 14.06 | 16.44 | 21.59 | 16.00 |
| PBCT-2F              | BTIC-2Cl-yCF3    | 17.15 | 16.82 | 14.85 | 15.20 | 14.99 | 17.00 | 17.55 | 16.00 |
| W1                   | PTIC-4Cl         | 16.75 | 14.52 | 15.14 | 16.13 | 16.95 | 16.53 | 14.89 | 16.00 |
| PBDB-TSCl            | Y18              | 17.45 | 15.03 | 14.86 | 15.37 | 17.23 | 16.07 | 15.25 | 16.00 |
| PTO2                 | Y22              | 17.55 | 15.25 | 14.63 | 14.32 | 18.14 | 16.11 | 15.93 | 16.00 |
| D18                  | BTDT-4F          | 16.68 | 16.06 | 14.51 | 15.33 | 18.17 | 15.25 | 16.45 | 16.00 |
| PBDB-T-SF            | BTIC-2Br-m,TPT10 | 16.28 | 15.32 | 15.38 | 16.07 | 17.29 | 15.65 | 15.87 | 16.00 |
| PBDE-DFDT            | LL3              | 17.63 | 15.10 | 15.43 | 15.98 | 16.42 | 15.43 | 24.39 | 16.00 |
| SZ5                  | ABP4T-4F         | 16.36 | 15.72 | 14.85 | 15.30 | 17.35 | 16.41 | 16.31 | 16.00 |
| PBT-SF               | Y6-1O            | 16.37 | 15.80 | 13.93 | 14.98 | 18.28 | 16.61 | 14.35 | 16.00 |
| PBQx-TF              | N3               | 16.66 | 18.78 | 12.23 | 16.37 | 17.74 | 14.18 | 17.28 | 15.99 |
| J11                  | LL4              | 17.12 | 15.41 | 16.10 | 16.06 | 16.10 | 15.15 | 26.20 | 15.99 |
| PBDTSF-TZNT          | LL3-2Cl          | 16.62 | 14.70 | 14.80 | 16.63 | 16.41 | 16.79 | 14.58 | 15.99 |
| PBDTS-TDZ            | BTP-S2           | 17.03 | 16.40 | 15.30 | 16.91 | 13.60 | 16.70 | 16.14 | 15.99 |
| SZ5                  | L8-BO            | 16.43 | 15.98 | 14.87 | 14.92 | 17.25 | 16.50 | 16.32 | 15.99 |
| P-FT                 | BTP-ClBr2        | 16.26 | 15.42 | 15.48 | 15.98 | 16.58 | 16.22 | 14.96 | 15.99 |
| PBDT-3TCO            | BTP-ClBr2        | 17.00 | 16.13 | 14.93 | 14.84 | 17.14 | 15.88 | 16.92 | 15.99 |
| BO2FC8               | Y6-2Se           | 15.49 | 16.71 | 14.99 | 15.23 | 17.12 | 16.38 | 14.84 | 15.99 |
| PBQx-TF              | BTPTT-4F,Y6      | 16.46 | 19.27 | 12.12 | 16.25 | 17.64 | 14.18 | 17.27 | 15.99 |
| SZ5                  | Y18              | 16.86 | 15.75 | 14.82 | 14.73 | 17.17 | 16.57 | 16.06 | 15.98 |
| PFOPB                | BTIC-2Cl-yCF3    | 17.05 | 16.24 | 14.31 | 15.33 | 16.95 | 16.03 | 15.47 | 15.98 |
| SZ5                  | AQx              | 16.51 | 15.78 | 14.75 | 15.43 | 16.88 | 16.55 | 15.23 | 15.98 |
| PBQx-TF              | BTSe-4F          | 16.11 | 19.44 | 11.75 | 16.10 | 17.38 | 15.11 | 17.00 | 15.98 |
| P5T-2F               | BTP-ClBr         | 15.61 | 16.79 | 16.01 | 17.38 | 13.96 | 16.16 | 16.16 | 15.98 |
| PCl(4)BDB-T          | LL3              | 17.40 | 14.98 | 16.28 | 16.26 | 14.57 | 16.39 | 27.34 | 15.98 |
| PFBDB-T              | TB-4Cl           | 16.29 | 16.33 | 14.97 | 15.18 | 16.39 | 16.73 | 15.64 | 15.98 |
| PBDB-T-SF            | BTDT-4F          | 16.46 | 15.49 | 15.00 | 15.63 | 17.42 | 15.88 | 15.26 | 15.98 |
| J62                  | BTP-S1           | 16.52 | 16.67 | 15.70 | 15.79 | 15.93 | 15.27 | 12.70 | 15.98 |
| PCl(4)BDB-T          | S-WSeSe-Cl       | 16.29 | 16.93 | 15.68 | 16.26 | 14.20 | 16.52 | 16.62 | 15.98 |
| PBDTS-TDZ            | BTP-4Cl,eC9      | 16.69 | 16.53 | 15.29 | 16.35 | 13.91 | 17.10 | 15.88 | 15.98 |
| PBDTS-TDZ            | BTP-eC9          | 16.69 | 16.53 | 15.29 | 16.35 | 13.91 | 17.10 | 15.88 | 15.98 |
| PBDTSF-TZNT          | BTIC-BO-4Br      | 16.71 | 14.93 | 13.97 | 17.43 | 16.43 | 16.39 | 14.91 | 15.98 |
| W1                   | N3               | 17.10 | 16.16 | 14.60 | 15.15 | 17.12 | 15.73 | 13.92 | 15.98 |
| PBCT-2F              | BPS-4F           | 17.09 | 17.08 | 14.77 | 16.03 | 14.38 | 16.52 | 18.49 | 15.98 |
| PBDB-T2F,PM6,PBDB-TF | Y9-2Br           | 16.44 | 15.37 | 15.55 | 15.52 | 16.82 | 16.15 | 15.48 | 15.98 |
| PBQ-4F               | BTIC-BO-4Br      | 16.92 | 15.58 | 14.63 | 15.53 | 16.36 | 16.84 | 15.21 | 15.98 |
| PBDB-TSCl            | BT-BO-L4F,BTP-S7 | 17.02 | 15.22 | 14.86 | 15.73 | 17.40 | 15.63 | 15.44 | 15.98 |
| SZ5                  | BTIC-2Cl-yCF3    | 16.71 | 16.04 | 14.63 | 15.14 | 16.94 | 16.40 | 16.21 | 15.97 |

|                   |                  |       |       |       |       |       |       |       |       |
|-------------------|------------------|-------|-------|-------|-------|-------|-------|-------|-------|
| W1                | AQx              | 17.04 | 16.40 | 14.55 | 15.45 | 16.41 | 16.00 | 13.52 | 15.97 |
| PDBT-2F           | BTP-S9           | 16.47 | 15.49 | 14.39 | 16.49 | 17.19 | 15.82 | 14.41 | 15.97 |
| PBN-S             | BTN-4F           | 17.19 | 15.53 | 14.65 | 14.62 | 17.56 | 16.29 | 15.06 | 15.97 |
| J62               | BTP-2F-2Cl,SY2   | 16.08 | 16.92 | 15.38 | 15.32 | 16.33 | 15.79 | 11.60 | 15.97 |
| PDBT-Cl           | BTSe-4F          | 16.60 | 16.21 | 14.85 | 14.96 | 16.97 | 16.24 | 15.67 | 15.97 |
| PBQ-4F            | BTP-ClBr         | 16.72 | 15.52 | 15.24 | 15.28 | 16.38 | 16.68 | 15.37 | 15.97 |
| BO2FC8            | BTIC-2Cl-yCF3    | 16.39 | 16.29 | 14.98 | 14.69 | 16.87 | 16.59 | 14.90 | 15.97 |
| PBBSe-Cl          | A-WSSe-Cl        | 16.10 | 16.66 | 15.13 | 16.59 | 15.57 | 15.76 | 15.98 | 15.97 |
| PDTB-EF-T         | Y9-2Br           | 16.42 | 15.49 | 15.20 | 15.66 | 16.61 | 16.44 | 15.65 | 15.97 |
| PBDB-TSCl         | N3               | 17.40 | 14.75 | 14.74 | 15.70 | 17.43 | 15.80 | 15.30 | 15.97 |
| PTQ11             | LL3              | 17.80 | 15.11 | 16.01 | 16.25 | 16.69 | 13.96 | 22.18 | 15.97 |
| 2T-TTC-BDTFT      | SY3              | 16.44 | 15.59 | 14.95 | 14.97 | 17.04 | 16.80 | 15.45 | 15.96 |
| TPD-3F            | Y6-2Se           | 16.51 | 17.81 | 13.17 | 14.51 | 17.54 | 16.24 | 14.43 | 15.96 |
| W1                | Y18              | 17.16 | 16.42 | 14.60 | 14.80 | 16.85 | 15.96 | 14.12 | 15.96 |
| PBQx-TF           | MS-4Cl           | 16.33 | 14.49 | 14.69 | 17.70 | 16.87 | 15.70 | 16.65 | 15.96 |
| PBTA-PSF          | LL4              | 17.01 | 15.78 | 15.40 | 15.73 | 16.73 | 15.12 | 23.27 | 15.96 |
| TPD-3F            | Y11              | 17.54 | 17.33 | 13.39 | 13.94 | 17.38 | 16.19 | 14.07 | 15.96 |
| PBCT-2F           | MS-4Cl           | 16.49 | 14.38 | 15.21 | 16.03 | 16.41 | 17.25 | 16.90 | 15.96 |
| PDBT-2F           | LL4              | 16.39 | 14.94 | 15.55 | 16.45 | 17.27 | 15.16 | 27.04 | 15.96 |
| PBQ-4F            | BTP-ClBr1        | 16.64 | 15.59 | 14.83 | 15.29 | 16.36 | 17.04 | 15.14 | 15.96 |
| J52-2F,J52-F,PFBZ | Y19              | 16.16 | 15.89 | 15.09 | 15.70 | 16.44 | 16.47 | 15.08 | 15.96 |
| PBDB-T-2Cl        | PT2IC-4Cl        | 16.25 | 15.40 | 15.48 | 16.11 | 16.11 | 16.39 | 15.45 | 15.96 |
| m-PBDTPS-FTAZ     | LL3              | 17.77 | 15.10 | 15.06 | 16.91 | 15.75 | 15.16 | 20.57 | 15.96 |
| J61               | LL3-2Cl          | 16.83 | 16.46 | 15.58 | 15.49 | 16.14 | 15.24 | 13.45 | 15.96 |
| PFOPB             | BTIC-2Br-m,TPT10 | 16.56 | 15.35 | 15.39 | 15.65 | 16.97 | 15.82 | 15.76 | 15.96 |
| PBDTSF-TZNT       | BO-4Cl           | 16.19 | 14.59 | 15.02 | 16.76 | 16.40 | 16.77 | 14.69 | 15.96 |
| PDBT-2F           | LL3              | 16.85 | 14.57 | 15.56 | 16.44 | 17.18 | 15.14 | 27.50 | 15.96 |
| PBFTT             | BTP-FCI-FCI      | 17.20 | 16.16 | 14.91 | 15.21 | 16.76 | 15.48 | 15.43 | 15.95 |
| PBDB-TSCl         | BTPTT-4F,Y6      | 17.29 | 14.78 | 14.84 | 15.57 | 17.37 | 15.88 | 15.29 | 15.95 |
| PBDTS-TDZ         | Y19              | 16.75 | 16.67 | 15.06 | 16.36 | 13.78 | 17.11 | 15.77 | 15.95 |
| 2T-TTC-BDTFT      | PTIC-4Cl         | 16.60 | 15.12 | 15.00 | 15.28 | 16.87 | 16.85 | 15.21 | 15.95 |
| PE4               | TB-4Cl           | 16.06 | 15.81 | 15.01 | 15.77 | 16.89 | 16.19 | 15.27 | 15.95 |
| BO2FC8            | PTIC-4Cl         | 16.39 | 14.92 | 15.58 | 15.61 | 16.49 | 16.71 | 14.95 | 15.95 |
| PBFTT             | BTP-S9           | 17.00 | 15.88 | 14.84 | 15.63 | 16.68 | 15.66 | 15.63 | 15.95 |
| PBDTS-Se-TAZ      | LL4              | 17.24 | 16.00 | 15.40 | 15.51 | 16.19 | 15.34 | 21.86 | 15.95 |
| PBQ-4F            | BTP-ClBr2        | 16.74 | 15.41 | 14.98 | 15.19 | 16.39 | 16.97 | 15.19 | 15.95 |
| P5T-2F            | BTP-ClBr2        | 15.70 | 16.84 | 15.61 | 17.31 | 13.97 | 16.23 | 16.27 | 15.94 |
| PBCT-2F           | Y6-1O            | 17.50 | 16.69 | 14.43 | 14.86 | 15.15 | 17.03 | 17.66 | 15.94 |
| PFBDB-T           | BTP-FCI-FCI      | 16.00 | 16.23 | 15.24 | 14.91 | 16.57 | 16.69 | 15.57 | 15.94 |
| P_chen,P105       | LL3              | 17.92 | 14.87 | 15.75 | 16.34 | 16.00 | 14.75 | 23.05 | 15.94 |
| PBDB-T-2Cl        | HDO-4Cl          | 16.23 | 15.79 | 15.00 | 15.77 | 16.27 | 16.57 | 16.09 | 15.94 |
| PTO2              | BTSe-4F          | 16.96 | 15.60 | 14.42 | 14.56 | 17.81 | 16.26 | 16.10 | 15.94 |
| PBT-SF            | BTIC-2Br-m,TPT10 | 16.05 | 15.53 | 15.07 | 15.62 | 17.44 | 15.90 | 15.47 | 15.94 |
| J52-2F,J52-F,PFBZ | BTP-S9           | 15.79 | 16.13 | 15.12 | 15.84 | 16.49 | 16.24 | 14.71 | 15.94 |

|                   |                  |       |       |       |       |       |       |       |       |
|-------------------|------------------|-------|-------|-------|-------|-------|-------|-------|-------|
| SZ5               | BTP-2F-ThCl      | 16.75 | 15.76 | 15.24 | 15.09 | 17.05 | 15.72 | 15.90 | 15.93 |
| PBT1-EH           | SY1              | 17.25 | 16.15 | 14.95 | 14.77 | 16.09 | 16.39 | 13.43 | 15.93 |
| TTFQx-T1          | Y19              | 16.54 | 15.89 | 14.80 | 15.09 | 15.90 | 17.38 | 14.78 | 15.93 |
| PBTA-PSF          | BTP-ClBr         | 15.86 | 16.09 | 15.12 | 16.92 | 16.28 | 15.32 | 14.26 | 15.93 |
| PDBT-F            | MS-4Cl           | 16.42 | 13.74 | 15.07 | 16.37 | 17.15 | 16.84 | 15.50 | 15.93 |
| PBDT-3TCO         | BTP-ClBr1        | 16.80 | 16.12 | 14.77 | 14.97 | 17.17 | 15.77 | 16.95 | 15.93 |
| PFOPB             | Y6-Se            | 17.50 | 15.97 | 13.92 | 15.76 | 16.75 | 15.70 | 16.00 | 15.93 |
| PBN-S             | TPQx-6F          | 17.32 | 16.13 | 14.33 | 15.15 | 16.42 | 16.23 | 14.47 | 15.93 |
| PBDTSF-TZNT       | BTP-S2           | 16.87 | 14.02 | 14.74 | 17.29 | 16.38 | 16.27 | 14.93 | 15.93 |
| SZ5               | N3               | 16.46 | 15.52 | 14.82 | 15.10 | 17.32 | 16.34 | 16.27 | 15.93 |
| P-CIT             | LL4              | 16.81 | 14.99 | 16.00 | 16.19 | 16.12 | 15.46 | 24.48 | 15.93 |
| TPD-3F            | BTIC-2Br-m,TPT10 | 16.62 | 15.98 | 15.29 | 14.52 | 17.02 | 16.14 | 15.14 | 15.93 |
| PBT1-EH           | Y9-2Br           | 17.01 | 15.62 | 15.54 | 15.67 | 15.43 | 16.29 | 14.59 | 15.93 |
| J61               | BO-4Cl           | 16.56 | 16.30 | 15.70 | 15.61 | 16.19 | 15.19 | 13.25 | 15.93 |
| H13               | LL3              | 17.52 | 14.77 | 15.67 | 15.71 | 16.23 | 15.65 | 24.74 | 15.93 |
| PBFTT             | Y19              | 17.04 | 15.75 | 14.74 | 15.45 | 16.53 | 16.04 | 15.70 | 15.93 |
| PFBDB-T           | PT2IC-4Cl        | 16.13 | 15.27 | 15.37 | 15.65 | 16.38 | 16.74 | 15.42 | 15.92 |
| J52-2F,J52-F,PFBZ | BTP-2F-2Cl,SY2   | 15.85 | 16.26 | 15.15 | 15.50 | 16.58 | 16.21 | 14.63 | 15.92 |
| 2T-TTC-BDTFT      | SY1              | 16.77 | 15.89 | 14.69 | 14.25 | 17.30 | 16.64 | 15.05 | 15.92 |
| PBQx-TF           | TPQx-6F          | 16.62 | 19.29 | 12.26 | 15.91 | 17.09 | 14.37 | 15.90 | 15.92 |
| PFOPB             | BPS-4F           | 16.60 | 16.50 | 13.86 | 16.13 | 16.73 | 15.71 | 16.14 | 15.92 |
| P5T-2F            | BTP-ClBr1        | 15.67 | 17.02 | 15.43 | 17.39 | 13.80 | 16.22 | 16.27 | 15.92 |
| PDBT-2F           | TB-4Cl           | 16.54 | 15.58 | 14.23 | 16.26 | 16.81 | 16.11 | 14.57 | 15.92 |
| PBT-Cl            | S-WSeSe-Cl       | 16.07 | 16.20 | 15.80 | 16.55 | 14.25 | 16.66 | 16.29 | 15.92 |
| TPD-3F            | BTIC-2Cl-yCF3    | 17.12 | 17.17 | 13.61 | 14.07 | 17.16 | 16.40 | 14.57 | 15.92 |
| PBDB-T-SF         | AQx-2            | 16.00 | 15.89 | 14.86 | 15.42 | 16.96 | 16.40 | 15.11 | 15.92 |
| PFBDB-T           | HDO-4Cl          | 16.12 | 15.72 | 14.91 | 15.31 | 16.55 | 16.92 | 16.06 | 15.92 |
| PBDB-T-2Cl        | BTP-FCl-FCI      | 15.84 | 16.11 | 15.43 | 15.37 | 16.46 | 16.30 | 15.61 | 15.92 |
| PE4               | CH1007           | 14.61 | 16.15 | 15.19 | 16.29 | 17.20 | 16.08 | 16.01 | 15.92 |
| SZ5               | BTPPTT-4F,Y6     | 16.27 | 15.70 | 14.86 | 14.99 | 17.27 | 16.41 | 16.27 | 15.92 |
| BO2FC8            | Y6-Se            | 16.62 | 15.63 | 14.79 | 15.05 | 16.71 | 16.69 | 15.81 | 15.92 |
| BO2FC8            | BT-BO-L4F,BTP-S7 | 16.29 | 15.91 | 15.09 | 14.70 | 17.06 | 16.45 | 14.33 | 15.91 |
| J62               | TB-4Cl           | 16.30 | 16.30 | 15.18 | 15.43 | 16.12 | 16.14 | 12.59 | 15.91 |
| PFOPB             | Y9-2Br           | 16.63 | 15.11 | 15.45 | 15.48 | 16.84 | 15.98 | 15.58 | 15.91 |
| PBT1-EH           | BTIC-2Br-m,TPT10 | 16.83 | 15.81 | 15.55 | 15.64 | 15.41 | 16.23 | 14.42 | 15.91 |
| PBDT-S-2TC        | LL4              | 17.52 | 16.12 | 15.60 | 15.06 | 15.14 | 16.04 | 22.55 | 15.91 |
| PBDT-3TCO         | BTIC-BO-4Br      | 17.11 | 15.96 | 14.34 | 15.33 | 17.12 | 15.60 | 16.98 | 15.91 |
| PBB-F             | TB-4Cl           | 16.50 | 16.93 | 14.28 | 15.18 | 16.05 | 16.52 | 17.17 | 15.91 |
| TPD-3F            | Y9-2Br           | 16.69 | 15.81 | 15.40 | 14.57 | 16.71 | 16.27 | 15.23 | 15.91 |
| PBTA-PSF          | A-WSSe-Cl        | 15.92 | 16.23 | 14.91 | 16.69 | 16.29 | 15.40 | 14.21 | 15.91 |
| HFQx-T            | LL4              | 16.74 | 14.89 | 15.51 | 16.00 | 15.89 | 16.40 | 24.68 | 15.91 |
| PBCT-2F           | BTP-2F-ThCl      | 17.19 | 16.50 | 15.25 | 15.16 | 15.08 | 16.24 | 17.02 | 15.91 |
| PBDTSF-TZNT       | Y19              | 16.42 | 14.63 | 14.63 | 16.56 | 16.49 | 16.69 | 14.51 | 15.90 |
| BO2FC8            | BPS-4F           | 15.70 | 16.56 | 14.84 | 15.12 | 17.02 | 16.19 | 15.20 | 15.90 |

|              |                  |       |       |       |       |       |       |       |       |
|--------------|------------------|-------|-------|-------|-------|-------|-------|-------|-------|
| H14          | LL3              | 17.66 | 14.98 | 15.56 | 15.66 | 16.18 | 15.38 | 24.08 | 15.90 |
| PE4          | BTP-FCI-FCI      | 15.49 | 15.77 | 15.35 | 15.56 | 17.30 | 15.95 | 14.90 | 15.90 |
| SM1-F        | LL4              | 16.92 | 15.57 | 15.32 | 15.50 | 15.94 | 16.16 | 26.84 | 15.90 |
| J52-2Cl      | A-WSSe-Cl        | 15.84 | 15.49 | 15.36 | 16.41 | 16.36 | 15.93 | 15.37 | 15.90 |
| PBB-F        | BTP-S9           | 16.52 | 17.19 | 13.56 | 14.98 | 16.68 | 16.47 | 17.16 | 15.90 |
| PBBSe-Cl     | LL4              | 16.57 | 15.34 | 15.69 | 16.45 | 15.90 | 15.43 | 26.86 | 15.90 |
| P5T-2F       | BTP-S2           | 15.74 | 17.08 | 15.59 | 17.51 | 13.71 | 15.75 | 16.23 | 15.90 |
| PE4          | PT2IC-4Cl        | 15.86 | 14.89 | 15.40 | 16.21 | 16.90 | 16.12 | 15.07 | 15.90 |
| PBDTSF-TZNT  | BTP-eC9          | 16.04 | 14.53 | 14.86 | 16.77 | 16.50 | 16.69 | 14.62 | 15.90 |
| PBDTSF-TZNT  | BTP-4Cl,eC9      | 16.04 | 14.53 | 14.86 | 16.77 | 16.50 | 16.69 | 14.62 | 15.90 |
| PBDTTAZ-NaPh | LL3              | 18.41 | 15.18 | 14.25 | 18.22 | 16.52 | 12.79 | 20.78 | 15.90 |
| P-4FP,P-FP   | LL4              | 16.98 | 14.73 | 15.80 | 16.40 | 16.17 | 15.28 | 25.75 | 15.89 |
| PBDB-T-SF    | BTN-4F           | 16.23 | 15.62 | 15.07 | 14.80 | 17.92 | 15.73 | 14.94 | 15.89 |
| PDBT-2F      | BTP-FCI-FCI      | 16.74 | 15.15 | 14.48 | 16.08 | 17.21 | 15.71 | 14.21 | 15.89 |
| HFQx-T       | BTP-S2           | 16.92 | 14.87 | 15.31 | 15.88 | 15.99 | 16.36 | 14.43 | 15.89 |
| PTO2         | Y6-1O            | 17.15 | 15.11 | 14.40 | 14.62 | 18.08 | 15.97 | 16.30 | 15.89 |
| PBQx-TF      | AQx-2            | 16.84 | 18.37 | 12.13 | 16.11 | 17.23 | 14.64 | 16.56 | 15.89 |
| PBT-SF       | Y26              | 16.58 | 16.07 | 13.94 | 14.34 | 18.41 | 15.98 | 13.89 | 15.89 |
| PTQ11        | LL4              | 17.08 | 15.73 | 15.84 | 16.22 | 16.70 | 13.75 | 21.65 | 15.89 |
| PDBT-F       | Y6-O             | 17.70 | 15.47 | 13.26 | 14.32 | 17.67 | 16.90 | 16.40 | 15.89 |
| J62          | CH1007           | 15.66 | 17.26 | 14.83 | 15.78 | 15.55 | 16.24 | 12.13 | 15.89 |
| PBT-Cl       | LL4              | 16.53 | 15.77 | 16.30 | 16.20 | 14.13 | 16.37 | 25.72 | 15.89 |
| PBDB-T-2Cl   | PTIC-4Cl         | 16.32 | 15.29 | 15.37 | 15.95 | 16.11 | 16.26 | 15.35 | 15.88 |
| J61          | BTP-eC9          | 16.45 | 16.36 | 15.62 | 15.62 | 16.16 | 15.10 | 13.14 | 15.88 |
| J61          | BTP-4Cl,eC9      | 16.45 | 16.36 | 15.62 | 15.62 | 16.16 | 15.10 | 13.14 | 15.88 |
| PBDB-T-2Cl   | SY3              | 16.11 | 15.77 | 15.29 | 15.64 | 16.31 | 16.18 | 15.55 | 15.88 |
| J52-Cl       | BTP-S2           | 16.30 | 14.76 | 15.86 | 16.57 | 16.23 | 15.57 | 14.90 | 15.88 |
| PBDT-3TCO    | BTP-S2           | 17.22 | 15.87 | 14.88 | 14.96 | 17.15 | 15.20 | 16.97 | 15.88 |
| SM1-S        | LL4              | 17.15 | 15.99 | 14.93 | 15.38 | 15.84 | 16.00 | 23.12 | 15.88 |
| PTO2         | BTP-2F-ThCl      | 17.07 | 15.32 | 15.15 | 14.85 | 17.27 | 15.62 | 15.97 | 15.88 |
| J11          | A-WSSe-Cl        | 15.61 | 16.13 | 15.43 | 16.73 | 15.89 | 15.49 | 15.58 | 15.88 |
| HFQx-T       | A-WSSe-Cl        | 16.57 | 15.61 | 14.81 | 15.70 | 15.83 | 16.75 | 14.73 | 15.88 |
| SZ5          | Y22              | 16.90 | 15.62 | 14.71 | 14.50 | 17.27 | 16.27 | 15.97 | 15.88 |
| PBB-F        | PT2IC-4Cl        | 16.36 | 16.11 | 14.72 | 15.63 | 16.02 | 16.42 | 16.79 | 15.88 |
| J11          | BTP-S2           | 16.26 | 15.74 | 15.97 | 16.92 | 15.71 | 14.67 | 15.31 | 15.88 |
| PBDT-S-2TC   | S-WSeSe-Cl       | 17.85 | 16.25 | 15.08 | 14.62 | 14.96 | 16.51 | 13.99 | 15.88 |
| L810         | A-WSSe-Cl        | 15.80 | 15.49 | 15.36 | 16.35 | 16.34 | 15.91 | 15.36 | 15.88 |
| P-4FP,P-FP   | A-WSSe-Cl        | 16.23 | 15.62 | 15.22 | 16.37 | 16.12 | 15.68 | 15.34 | 15.87 |
| PDTB-EF-T    | BTN-4F           | 16.11 | 16.00 | 14.29 | 14.33 | 18.27 | 16.24 | 14.11 | 15.87 |
| PBZ-ClSi     | Y9-2Br           | 16.28 | 15.20 | 16.47 | 15.47 | 15.75 | 16.07 | 14.75 | 15.87 |
| J52-2Cl      | BTP-ClBr         | 15.85 | 15.44 | 15.47 | 16.48 | 16.51 | 15.48 | 15.28 | 15.87 |
| PBBSe-Cl     | BTP-ClBr2        | 16.03 | 16.29 | 15.14 | 16.60 | 15.62 | 15.54 | 15.75 | 15.87 |
| PDBT-Cl      | BDTP-4F          | 17.09 | 15.23 | 14.80 | 15.23 | 17.06 | 15.82 | 15.28 | 15.87 |
| PDBT-F       | Y9-2Br           | 16.41 | 15.37 | 15.29 | 15.52 | 16.70 | 15.92 | 15.47 | 15.87 |
| PBCT-2F      | BT-BO-L4F,BTP-S7 | 17.21 | 16.65 | 14.93 | 15.23 | 14.15 | 17.05 | 17.74 | 15.87 |
| PBDB-TSCl    | BTP-2F-ThCl      | 16.84 | 15.28 | 15.14 | 15.63 | 17.01 | 15.31 | 15.27 | 15.87 |

|                              |                      |       |       |       |       |       |       |       |       |
|------------------------------|----------------------|-------|-------|-------|-------|-------|-------|-------|-------|
| PBDB-TSCl                    | Y22                  | 17.41 | 15.05 | 14.65 | 15.08 | 17.34 | 15.68 | 15.17 | 15.87 |
| PBT-SF                       | BDTP-4F              | 16.09 | 15.81 | 14.33 | 15.19 | 17.76 | 16.03 | 13.90 | 15.87 |
| PBFTT                        | LL4                  | 16.74 | 14.67 | 15.94 | 15.96 | 16.31 | 15.59 | 30.35 | 15.87 |
| PE4                          | HDO-4Cl              | 15.84 | 15.17 | 14.86 | 15.91 | 17.08 | 16.35 | 15.72 | 15.87 |
| P5T-2F                       | BO-4Cl               | 15.47 | 16.85 | 15.70 | 17.07 | 13.86 | 16.25 | 16.17 | 15.87 |
| J61                          | Y19                  | 16.64 | 16.51 | 15.46 | 15.39 | 16.07 | 15.13 | 13.35 | 15.87 |
| J101                         | LL4                  | 17.86 | 14.04 | 16.96 | 15.76 | 14.67 | 15.90 | 24.14 | 15.86 |
| PBT-SF                       | MS-4Cl               | 16.27 | 13.95 | 14.70 | 16.34 | 17.17 | 16.75 | 14.91 | 15.86 |
| BO2FC8                       | BTIC-2Br-<br>m,TPT10 | 16.14 | 15.54 | 15.47 | 15.12 | 16.62 | 16.30 | 15.49 | 15.86 |
| PFBDB-T                      | SY3                  | 16.01 | 15.71 | 15.20 | 15.20 | 16.52 | 16.53 | 15.52 | 15.86 |
| PBQx-TF                      | BTTPC-Br             | 15.46 | 16.27 | 14.20 | 17.24 | 16.18 | 15.82 | 16.50 | 15.86 |
| PBBSe-Cl                     | BTP-ClBr             | 15.99 | 16.13 | 15.34 | 16.68 | 15.52 | 15.50 | 15.72 | 15.86 |
| BSCl-C2                      | S-WSeSe-Cl           | 17.74 | 15.42 | 15.31 | 15.33 | 15.76 | 15.62 | 14.78 | 15.86 |
| J62                          | PT2IC-4Cl            | 15.88 | 15.27 | 15.59 | 15.95 | 16.43 | 16.06 | 12.57 | 15.86 |
| PBCIT,PCE1<br>0-2Cl          | S-WSeSe-Cl           | 17.11 | 15.18 | 14.88 | 16.34 | 16.32 | 15.32 | 16.63 | 15.86 |
| W1                           | Y22                  | 17.06 | 16.32 | 14.49 | 14.55 | 16.87 | 15.87 | 14.04 | 15.86 |
| J52-Cl                       | A-WSeSe-Cl           | 15.77 | 15.38 | 15.25 | 16.38 | 16.39 | 15.99 | 15.17 | 15.86 |
| PBZ-ClSi                     | BTIC-2Br-<br>m,TPT10 | 15.42 | 15.20 | 16.31 | 15.70 | 16.66 | 15.86 | 14.72 | 15.86 |
| TPD-3F                       | Y12                  | 17.07 | 17.32 | 13.41 | 13.86 | 17.58 | 15.91 | 13.94 | 15.86 |
| TPD-3F                       | Y6-BO                | 17.07 | 17.32 | 13.41 | 13.86 | 17.58 | 15.91 | 13.94 | 15.86 |
| PBB-F                        | SY3                  | 16.32 | 16.53 | 14.57 | 15.10 | 16.04 | 16.58 | 16.85 | 15.86 |
| 2T-TTC-<br>BDTFT             | Y11                  | 16.97 | 15.61 | 13.93 | 14.24 | 17.38 | 17.00 | 14.57 | 15.86 |
| PBDB-<br>T2F,PM6,PB<br>DB-TF | MS-4Cl               | 16.27 | 13.60 | 15.35 | 16.15 | 16.90 | 16.86 | 15.44 | 15.86 |
| J101                         | S-WSeSe-Cl           | 16.37 | 14.10 | 16.50 | 17.00 | 14.71 | 16.43 | 15.27 | 15.85 |
| BO2FC8                       | Y11                  | 16.80 | 15.86 | 14.76 | 14.64 | 16.63 | 16.42 | 14.44 | 15.85 |
| PBZ-ClSi                     | BO-4Cl               | 16.04 | 14.23 | 16.43 | 16.76 | 16.13 | 15.50 | 14.60 | 15.85 |
| W1                           | BTP-6F               | 16.89 | 15.91 | 14.30 | 15.52 | 17.04 | 15.44 | 13.68 | 15.85 |
| PTQ11                        | S-WSeSe-Cl           | 17.25 | 15.91 | 15.40 | 15.79 | 16.13 | 14.62 | 13.73 | 15.85 |
| J62                          | SY3                  | 15.74 | 15.72 | 15.36 | 15.51 | 16.55 | 16.21 | 12.91 | 15.85 |
| PBDB-T-SF                    | Y9-2Br               | 16.35 | 15.08 | 15.36 | 15.81 | 16.82 | 15.66 | 15.46 | 15.85 |
| PBFTT                        | LL3                  | 17.07 | 14.30 | 15.98 | 15.95 | 16.03 | 15.75 | 30.68 | 15.85 |
| L810                         | BTP-ClBr             | 15.80 | 15.45 | 15.47 | 16.42 | 16.49 | 15.46 | 15.27 | 15.85 |
| J52-2Cl                      | BTP-S2               | 16.34 | 14.90 | 15.73 | 16.60 | 16.29 | 15.22 | 15.10 | 15.85 |
| PBN-S                        | Y6-O                 | 17.42 | 15.51 | 13.25 | 14.47 | 17.53 | 16.90 | 16.29 | 15.85 |
| PBFTT                        | TB-4Cl               | 17.29 | 15.62 | 14.55 | 15.42 | 16.28 | 15.90 | 15.55 | 15.84 |
| PFBDB-T                      | PTIC-4Cl             | 16.20 | 15.16 | 15.26 | 15.49 | 16.36 | 16.59 | 15.32 | 15.84 |
| PCl(4)BDB-<br>T              | LL4                  | 16.43 | 15.40 | 16.13 | 16.23 | 14.64 | 16.23 | 26.85 | 15.84 |
| P-FT                         | BO-4Cl               | 16.06 | 15.13 | 15.31 | 15.68 | 16.44 | 16.44 | 14.80 | 15.84 |
| PBN-S                        | BDTP-4F              | 17.10 | 15.08 | 14.89 | 15.09 | 17.16 | 15.72 | 15.17 | 15.84 |
| PBDTS-Se-<br>TAZ             | BTP-ClBr             | 15.90 | 16.13 | 15.16 | 16.65 | 15.70 | 15.51 | 13.35 | 15.84 |
| PBQx-TF                      | Y26                  | 16.94 | 18.14 | 12.20 | 15.43 | 17.84 | 14.48 | 16.78 | 15.84 |
| PBDT-3TCO                    | LL3-2Cl              | 16.69 | 16.04 | 14.71 | 14.60 | 17.21 | 15.79 | 16.68 | 15.84 |
| J62                          | Y9-2Br               | 16.01 | 15.56 | 15.43 | 15.14 | 16.81 | 16.09 | 13.56 | 15.84 |
| BO2FC8                       | Y9-2Br               | 16.30 | 15.45 | 15.52 | 15.01 | 16.34 | 16.41 | 15.28 | 15.84 |
| PDBT-2F                      | HDO-4Cl              | 16.32 | 15.14 | 13.95 | 16.45 | 16.92 | 16.24 | 14.92 | 15.84 |

|             |                  |       |       |       |       |       |       |       |       |
|-------------|------------------|-------|-------|-------|-------|-------|-------|-------|-------|
| PDBT-F      | TPQx-6F          | 17.28 | 16.20 | 14.22 | 15.00 | 16.37 | 15.95 | 14.37 | 15.84 |
| PBFTT       | Y6-Se            | 17.55 | 16.32 | 14.38 | 15.20 | 16.01 | 15.56 | 15.85 | 15.84 |
| J52-2Cl     | BTP-ClBr2        | 15.72 | 15.32 | 15.24 | 16.42 | 16.60 | 15.71 | 15.02 | 15.84 |
| PBTA-PSF    | BTP-ClBr2        | 15.85 | 16.01 | 14.88 | 16.75 | 16.34 | 15.18 | 13.89 | 15.84 |
| PBQx-TF     | BTP-2Cl-delta,H2 | 16.11 | 15.96 | 14.31 | 16.32 | 16.72 | 15.60 | 16.43 | 15.84 |
| PDTB-EF-T   | TPQx-6F          | 16.57 | 16.39 | 14.01 | 14.96 | 16.83 | 16.26 | 13.68 | 15.83 |
| W1          | BTIC-2Br-m,TPT10 | 15.95 | 15.26 | 15.03 | 15.48 | 17.16 | 16.11 | 15.34 | 15.83 |
| PTO2        | BTIC-2Br-m,TPT10 | 16.33 | 15.10 | 14.99 | 15.22 | 17.20 | 16.15 | 16.27 | 15.83 |
| TTFQx-T1    | BTP-S1           | 16.83 | 14.94 | 15.28 | 15.24 | 15.76 | 16.94 | 14.83 | 15.83 |
| P-FT        | LL3-2Cl          | 16.15 | 15.37 | 15.23 | 15.42 | 16.34 | 16.48 | 14.68 | 15.83 |
| PBQ-4F      | BO-4Cl           | 16.38 | 15.23 | 14.86 | 14.91 | 16.39 | 17.20 | 15.04 | 15.83 |
| J61         | Y9-2Br           | 16.04 | 15.73 | 15.72 | 15.12 | 16.68 | 15.68 | 14.04 | 15.83 |
| J52-2Cl     | BTIC-BO-4Br      | 15.89 | 15.47 | 15.00 | 16.65 | 16.50 | 15.45 | 15.09 | 15.83 |
| TTFQx-T1    | BTP-S9           | 16.45 | 15.61 | 14.83 | 14.98 | 15.88 | 17.21 | 14.44 | 15.83 |
| PDBT-2F     | PT2IC-4Cl        | 16.09 | 14.79 | 14.59 | 16.73 | 16.92 | 15.84 | 14.38 | 15.83 |
| PBT1-EH     | BTIC-2Cl-yCF3    | 17.17 | 16.51 | 14.25 | 15.01 | 15.55 | 16.48 | 13.42 | 15.83 |
| PBZ-CISi    | LL3-2Cl          | 16.71 | 14.35 | 16.24 | 16.33 | 15.79 | 15.54 | 14.48 | 15.83 |
| PBT-SF      | Y9-2Br           | 16.30 | 15.50 | 15.02 | 15.34 | 16.87 | 15.92 | 15.27 | 15.83 |
| PBDE-DFDT   | LL4              | 16.75 | 15.47 | 15.14 | 15.94 | 16.55 | 15.10 | 23.86 | 15.83 |
| PBDB-TSCl   | BTIC-2Br-m,TPT10 | 16.50 | 15.14 | 15.14 | 15.99 | 16.88 | 15.30 | 15.82 | 15.83 |
| PBB-F       | Y9-2Br           | 16.45 | 16.31 | 14.71 | 15.14 | 15.85 | 16.48 | 16.63 | 15.82 |
| P5T-2F      | LL3-2Cl          | 15.96 | 17.03 | 15.51 | 16.47 | 13.68 | 16.29 | 15.92 | 15.82 |
| P5T-2F      | BTIC-BO-4Br      | 15.90 | 16.92 | 14.79 | 17.55 | 13.74 | 16.04 | 16.31 | 15.82 |
| PFOPB       | Y11              | 17.47 | 15.82 | 14.33 | 15.21 | 16.77 | 15.33 | 15.59 | 15.82 |
| J52-Cl      | BTP-ClBr         | 15.76 | 15.35 | 15.35 | 16.44 | 16.54 | 15.49 | 15.07 | 15.82 |
| PBDTS-TDZ   | SY3              | 16.30 | 16.20 | 15.25 | 15.92 | 14.31 | 16.95 | 15.75 | 15.82 |
| L810        | BTP-S2           | 16.30 | 14.90 | 15.72 | 16.53 | 16.27 | 15.19 | 15.09 | 15.82 |
| W1          | BTP-2F-ThCl      | 16.63 | 16.05 | 15.03 | 15.10 | 16.70 | 15.40 | 14.40 | 15.82 |
| PBB-F       | PTIC-4Cl         | 16.43 | 15.95 | 14.63 | 15.48 | 16.04 | 16.39 | 16.68 | 15.82 |
| PBDB-T-2Cl  | SY1              | 16.13 | 15.89 | 15.29 | 14.94 | 16.67 | 15.99 | 15.28 | 15.82 |
| PCl(4)BDB-T | A-WSSe-Cl        | 16.01 | 16.59 | 15.48 | 16.11 | 14.21 | 16.50 | 16.07 | 15.82 |
| P-4FP,P-PP  | BTP-ClBr         | 16.21 | 15.34 | 15.37 | 16.43 | 16.13 | 15.41 | 15.22 | 15.82 |
| D18         | TPQx-6F          | 16.48 | 16.63 | 14.17 | 15.01 | 17.17 | 15.42 | 15.72 | 15.81 |
| TPD-3F      | BT-BO-L4F,BTP-S7 | 17.15 | 17.00 | 13.32 | 13.91 | 17.27 | 16.24 | 13.86 | 15.81 |
| PBDB-TSCl   | BTP-6F           | 17.28 | 14.24 | 14.40 | 16.06 | 17.10 | 15.80 | 15.42 | 15.81 |
| PBDB-TSCl   | MS-4Cl           | 16.52 | 14.02 | 14.88 | 16.67 | 16.70 | 16.09 | 15.32 | 15.81 |
| TPD-3F      | Y18              | 17.37 | 17.40 | 13.03 | 13.87 | 17.28 | 15.92 | 13.74 | 15.81 |
| J52-Cl      | BTIC-BO-4Br      | 15.80 | 15.35 | 14.94 | 16.62 | 16.59 | 15.56 | 14.89 | 15.81 |
| SM1-F       | S-WSeSe-Cl       | 17.02 | 16.35 | 14.77 | 14.36 | 15.76 | 16.59 | 16.69 | 15.81 |
| PBB-F       | BTP-2F-2Cl,SY2   | 16.42 | 17.20 | 13.61 | 14.78 | 16.56 | 16.29 | 17.20 | 15.81 |
| PDBT-Cl     | AQx-2            | 16.66 | 15.66 | 14.58 | 15.01 | 16.66 | 16.28 | 15.10 | 15.81 |
| PBDT-3TCO   | BO-4Cl           | 16.60 | 16.01 | 14.84 | 14.44 | 17.22 | 15.75 | 16.81 | 15.81 |
| PBT-SF      | AQx-2            | 15.84 | 16.06 | 14.14 | 14.94 | 17.35 | 16.52 | 14.01 | 15.81 |
| L810        | BTP-ClBr2        | 15.68 | 15.33 | 15.24 | 16.36 | 16.55 | 15.69 | 15.01 | 15.81 |



|                     |                      |       |       |       |       |       |       |       |       |
|---------------------|----------------------|-------|-------|-------|-------|-------|-------|-------|-------|
| J52-2Cl             | BTP-ClBr1            | 15.73 | 15.41 | 15.11 | 16.49 | 16.48 | 15.63 | 15.00 | 15.81 |
| PBCIT,PCE1<br>0-2Cl | BTP-S2               | 17.28 | 14.37 | 15.39 | 16.33 | 16.25 | 15.22 | 15.74 | 15.81 |
| PBDB-TSCl           | BTSe-4F              | 16.88 | 14.98 | 14.90 | 15.37 | 17.01 | 15.69 | 15.18 | 15.81 |
| HFQx-T              | BTIC-BO-<br>4Br      | 16.85 | 15.44 | 14.51 | 15.97 | 15.75 | 16.31 | 14.37 | 15.80 |
| PBDTS-Se-<br>TAZ    | A-WSSe-Cl            | 15.98 | 16.23 | 14.95 | 16.43 | 15.64 | 15.58 | 12.96 | 15.80 |
| L810                | BTIC-BO-<br>4Br      | 15.84 | 15.48 | 15.00 | 16.60 | 16.48 | 15.43 | 15.08 | 15.80 |
| PBT1-EH             | MS-4Cl               | 16.50 | 14.47 | 15.38 | 16.24 | 15.50 | 16.72 | 14.00 | 15.80 |
| PDTB-EF-T           | Y6-O                 | 16.66 | 16.04 | 12.88 | 14.26 | 18.11 | 16.86 | 15.00 | 15.80 |
| J62                 | BTP-FCI-FCI          | 15.72 | 16.91 | 15.41 | 15.20 | 16.12 | 15.43 | 11.37 | 15.80 |
| PBB-F               | HDO-4Cl              | 16.32 | 16.30 | 14.45 | 15.11 | 16.16 | 16.46 | 17.32 | 15.80 |
| TPD-3F              | BP5T-4F              | 16.99 | 17.42 | 13.21 | 14.11 | 17.25 | 15.80 | 13.78 | 15.80 |
| PBQ-4F              | LL3-2Cl              | 16.50 | 15.45 | 14.76 | 14.60 | 16.25 | 17.21 | 14.88 | 15.80 |
| PBDTS-TDZ           | TB-4Cl               | 16.53 | 16.52 | 14.88 | 16.12 | 13.77 | 16.97 | 15.64 | 15.80 |
| J11                 | BTP-ClBr             | 15.57 | 15.71 | 15.51 | 16.73 | 15.96 | 15.30 | 15.46 | 15.80 |
| P2F-EHp             | S-WSeSe-Cl           | 16.53 | 16.07 | 14.89 | 15.78 | 16.10 | 15.41 | 14.91 | 15.80 |
| PBBSe-Cl            | BTP-ClBr1            | 15.95 | 16.26 | 14.97 | 16.69 | 15.50 | 15.40 | 15.75 | 15.79 |
| HFQx-T              | BTP-ClBr             | 16.64 | 15.39 | 14.96 | 15.78 | 15.80 | 16.21 | 14.62 | 15.79 |
| PDBT-F              | BDTP-4F              | 17.44 | 14.68 | 14.95 | 15.05 | 17.26 | 15.38 | 15.35 | 15.79 |
| PBTA-PSF            | BTP-ClBr1            | 15.87 | 16.09 | 14.70 | 16.90 | 16.25 | 14.93 | 13.89 | 15.79 |
| P-FT                | BTP-eC9              | 15.94 | 15.19 | 15.26 | 15.69 | 16.29 | 16.38 | 14.73 | 15.79 |
| P-FT                | BTP-4Cl,eC9          | 15.94 | 15.19 | 15.26 | 15.69 | 16.29 | 16.38 | 14.73 | 15.79 |
| TTFQx-T1            | BTP-2F-<br>2Cl,SY2   | 16.58 | 15.48 | 14.86 | 14.70 | 15.84 | 17.29 | 14.36 | 15.79 |
| PE4                 | SY3                  | 15.61 | 15.33 | 15.16 | 15.72 | 17.01 | 15.91 | 15.32 | 15.79 |
| SZ5                 | BTIC-2Br-<br>m,TPT10 | 16.31 | 15.24 | 15.11 | 15.50 | 16.79 | 15.78 | 16.10 | 15.79 |
| PE4                 | PTIC-4Cl             | 15.91 | 14.71 | 15.28 | 16.05 | 16.79 | 15.99 | 14.96 | 15.79 |
| PBB-F               | BTP-S1               | 16.52 | 16.89 | 13.76 | 15.60 | 16.23 | 15.73 | 17.47 | 15.79 |
| TPD-3F              | BPS-4F               | 16.63 | 17.62 | 12.96 | 14.24 | 17.23 | 16.03 | 14.72 | 15.79 |
| PBZ-ClSi            | BTP-S2               | 16.62 | 13.84 | 16.39 | 17.12 | 15.66 | 15.08 | 14.83 | 15.79 |
| P5T-2F              | BTP-eC9              | 15.32 | 16.92 | 15.56 | 17.05 | 13.69 | 16.17 | 16.09 | 15.79 |
| L810                | BTP-ClBr1            | 15.69 | 15.42 | 15.11 | 16.43 | 16.46 | 15.60 | 14.98 | 15.78 |
| PFBDB-T             | SY1                  | 16.26 | 15.83 | 15.10 | 14.50 | 16.66 | 16.35 | 15.23 | 15.78 |
| J62                 | BTIC-2Br-<br>m,TPT10 | 15.72 | 15.71 | 15.36 | 15.34 | 16.65 | 15.93 | 13.35 | 15.78 |
| PBN-S               | eC9-2Cl              | 16.45 | 14.68 | 15.13 | 15.75 | 16.71 | 15.97 | 15.44 | 15.78 |
| PBDTS-TDZ           | PT2IC-4Cl            | 16.34 | 15.74 | 15.34 | 16.33 | 14.01 | 16.93 | 15.40 | 15.78 |
| PBB-F               | BTIC-2Br-<br>m,TPT10 | 16.24 | 16.43 | 14.40 | 15.09 | 16.07 | 16.44 | 16.90 | 15.78 |
| PBQx-TF             | Y6-1O                | 16.30 | 18.54 | 12.21 | 15.94 | 17.69 | 14.00 | 17.33 | 15.78 |
| PFOPB               | BT-BO-<br>L4F,BTP-S7 | 17.07 | 15.67 | 14.23 | 15.38 | 16.90 | 15.42 | 15.37 | 15.78 |
| HFQx-T              | BTP-ClBr2            | 16.67 | 15.41 | 14.72 | 15.72 | 15.66 | 16.50 | 14.35 | 15.78 |
| PBDT-3TCO           | BTP-eC9              | 16.54 | 16.03 | 14.75 | 14.45 | 17.24 | 15.66 | 16.73 | 15.78 |
| PBDT-3TCO           | BTP-4Cl,eC9          | 16.54 | 16.03 | 14.75 | 14.45 | 17.24 | 15.66 | 16.73 | 15.78 |
| J52-Cl              | BTP-ClBr1            | 15.65 | 15.30 | 15.00 | 16.45 | 16.52 | 15.75 | 14.80 | 15.78 |
| J52-Cl              | BTP-ClBr2            | 15.64 | 15.24 | 15.12 | 16.38 | 16.54 | 15.74 | 14.82 | 15.78 |
| HFQx-T              | BTP-ClBr1            | 16.54 | 15.46 | 14.58 | 15.79 | 15.78 | 16.51 | 14.29 | 15.78 |
| PDBT-Cl             | BTIC-2Br-<br>m,TPT10 | 16.29 | 15.20 | 15.09 | 15.72 | 16.81 | 15.55 | 15.75 | 15.78 |
| TPD-3F              | L8-BO                | 16.98 | 17.53 | 13.15 | 13.93 | 17.09 | 15.97 | 13.73 | 15.77 |

|                       |                      |       |       |       |       |       |       |       |       |
|-----------------------|----------------------|-------|-------|-------|-------|-------|-------|-------|-------|
| W1                    | BTSe-4F              | 16.43 | 16.20 | 14.41 | 14.85 | 16.50 | 16.25 | 14.20 | 15.77 |
| PDTB-EF-T             | BDTP-4F              | 15.99 | 15.71 | 14.54 | 14.83 | 17.78 | 15.77 | 13.96 | 15.77 |
| SZ5                   | BTP-6F               | 16.07 | 15.36 | 14.53 | 15.41 | 16.91 | 16.34 | 16.49 | 15.77 |
| D18                   | BDTP-4F              | 16.49 | 15.72 | 14.43 | 15.04 | 18.19 | 14.75 | 16.27 | 15.77 |
| TPD-3F                | Y22                  | 17.40 | 17.22 | 13.08 | 13.62 | 17.39 | 15.92 | 13.67 | 15.77 |
| J62                   | PTIC-4Cl             | 16.02 | 15.06 | 15.47 | 15.78 | 16.26 | 16.02 | 12.50 | 15.77 |
| 2T-TTC-<br>BDTFT      | Y6-2Se               | 15.92 | 16.30 | 13.65 | 14.86 | 17.40 | 16.47 | 15.05 | 15.77 |
| J62                   | HDO-4Cl              | 15.91 | 15.61 | 15.06 | 15.61 | 16.39 | 16.03 | 12.93 | 15.77 |
| 2T-TTC-<br>BDTFT      | Y6-Se                | 16.97 | 15.29 | 13.50 | 14.58 | 17.25 | 17.01 | 16.00 | 15.77 |
| BO2FC8                | BTP-2F-<br>ThCl      | 16.31 | 15.98 | 15.48 | 14.63 | 16.59 | 15.61 | 14.51 | 15.77 |
| PBDT-3TCO             | Y19                  | 16.58 | 16.07 | 14.54 | 14.51 | 17.20 | 15.70 | 16.63 | 15.77 |
| PBB-F                 | MS-4Cl               | 16.20 | 14.92 | 14.85 | 15.65 | 16.48 | 16.50 | 16.41 | 15.77 |
| QX2                   | LL3                  | 16.72 | 14.80 | 15.31 | 16.07 | 16.33 | 15.37 | 23.55 | 15.77 |
| PBN-S                 | BTP-2Cl-<br>delta,H2 | 16.36 | 14.89 | 15.18 | 15.53 | 16.63 | 16.00 | 15.30 | 15.76 |
| D18                   | eC9-2Cl              | 16.03 | 15.01 | 15.29 | 15.50 | 16.72 | 16.03 | 16.30 | 15.76 |
| PBZ-CISi              | BTP-eC9              | 15.86 | 14.23 | 16.29 | 16.72 | 16.04 | 15.42 | 14.53 | 15.76 |
| PBZ-CISi              | BTP-4Cl,eC9          | 15.86 | 14.23 | 16.29 | 16.72 | 16.04 | 15.42 | 14.53 | 15.76 |
| PBT1-C-2Cl            | LL3                  | 17.21 | 15.26 | 15.17 | 17.33 | 13.57 | 16.03 | 24.42 | 15.76 |
| PFBDB-T               | Y6-Se                | 16.38 | 16.13 | 14.10 | 14.89 | 16.35 | 16.71 | 15.84 | 15.76 |
| J62                   | SY1                  | 15.75 | 16.41 | 15.24 | 14.80 | 16.52 | 15.85 | 12.04 | 15.76 |
| SZ5                   | BDTP-4F              | 16.70 | 15.12 | 14.82 | 14.97 | 17.12 | 15.83 | 15.64 | 15.76 |
| J11                   | BTP-CIBr2            | 15.41 | 15.75 | 15.28 | 16.68 | 16.16 | 15.28 | 15.25 | 15.76 |
| TPD-3F                | ABP4T-4F             | 16.94 | 17.37 | 13.22 | 13.88 | 17.37 | 15.79 | 13.69 | 15.76 |
| J52-2F,J52-<br>F,PFBZ | TB-4Cl               | 15.89 | 15.64 | 14.92 | 15.60 | 16.20 | 16.30 | 14.87 | 15.76 |
| PFOPB                 | Y12                  | 17.00 | 15.76 | 14.34 | 15.45 | 16.96 | 15.04 | 15.48 | 15.76 |
| PFOPB                 | Y6-BO                | 17.00 | 15.76 | 14.34 | 15.45 | 16.96 | 15.04 | 15.48 | 15.76 |
| PBDT-S-2TC            | BTP-CIBr             | 17.77 | 15.82 | 15.23 | 14.65 | 15.01 | 16.07 | 13.64 | 15.76 |
| PBTA-PSF              | LL3-2Cl              | 16.14 | 15.95 | 14.66 | 16.52 | 16.32 | 14.96 | 13.71 | 15.76 |
| SZ5                   | AQx-2                | 16.60 | 15.44 | 14.66 | 14.78 | 16.81 | 16.26 | 15.46 | 15.76 |
| SZ5                   | MS-4Cl               | 16.31 | 14.10 | 14.96 | 15.99 | 16.60 | 16.58 | 15.84 | 15.76 |
| D18                   | BTP-2Cl-<br>delta,H2 | 15.92 | 15.22 | 15.35 | 15.29 | 16.71 | 16.05 | 16.18 | 15.76 |
| P-4FP,P-FP            | BTP-CIBr1            | 16.15 | 15.49 | 15.00 | 16.44 | 16.13 | 15.30 | 15.02 | 15.75 |
| P-4FP,P-FP            | BTP-CIBr2            | 16.17 | 15.36 | 15.17 | 16.36 | 15.99 | 15.46 | 15.03 | 15.75 |
| PBQ-4F                | BTP-eC9              | 16.29 | 15.25 | 14.79 | 14.88 | 16.14 | 17.15 | 14.96 | 15.75 |
| PBQ-4F                | BTP-4Cl,eC9          | 16.29 | 15.25 | 14.79 | 14.88 | 16.14 | 17.15 | 14.96 | 15.75 |
| PDBT-Cl               | MS-4Cl               | 16.29 | 13.87 | 14.84 | 16.25 | 16.79 | 16.47 | 15.49 | 15.75 |
| J11                   | BTP-CIBr1            | 15.57 | 16.00 | 15.16 | 16.75 | 15.93 | 15.09 | 15.22 | 15.75 |
| PBDTS-TDZ             | BTP-S9               | 16.44 | 16.56 | 14.48 | 15.69 | 14.33 | 16.99 | 15.45 | 15.75 |
| P-FT                  | Y19                  | 16.04 | 15.41 | 15.17 | 15.31 | 16.15 | 16.40 | 14.62 | 15.75 |
| PBCT-2F               | BTIC-2Br-<br>m,TPT10 | 16.35 | 15.85 | 15.39 | 15.54 | 14.81 | 16.54 | 17.01 | 15.75 |
| 2T-TTC-<br>BDTFT      | BTIC-2Cl-<br>yCF3    | 16.64 | 16.01 | 13.85 | 14.29 | 16.95 | 16.74 | 15.11 | 15.75 |
| SZ5                   | Y6-1O                | 16.14 | 15.43 | 14.50 | 14.80 | 17.24 | 16.36 | 16.35 | 15.75 |
| TPD-3F                | BTP-2F-<br>ThCl      | 17.16 | 16.81 | 14.35 | 14.05 | 16.74 | 15.36 | 14.02 | 15.75 |
| PFOPB                 | MS-4Cl               | 16.41 | 13.52 | 15.26 | 16.18 | 16.99 | 16.11 | 15.33 | 15.75 |
| PDBT-Cl               | Y26                  | 17.05 | 15.37 | 14.42 | 14.37 | 17.61 | 15.65 | 15.50 | 15.75 |

|                       |                      |       |       |       |       |       |       |       |       |
|-----------------------|----------------------|-------|-------|-------|-------|-------|-------|-------|-------|
| PBDB-T-SF             | Y6-O                 | 16.81 | 15.68 | 13.19 | 14.56 | 17.76 | 16.47 | 16.16 | 15.74 |
| PFOPB                 | BTP-2F-<br>ThCl      | 16.99 | 15.81 | 15.13 | 15.23 | 16.52 | 14.77 | 15.13 | 15.74 |
| TPD-3F                | N3                   | 17.02 | 17.16 | 13.17 | 13.86 | 17.53 | 15.71 | 13.69 | 15.74 |
| W1                    | MS-4Cl               | 16.23 | 13.49 | 14.87 | 15.99 | 17.26 | 16.62 | 15.00 | 15.74 |
| PBDB-TSCl             | Y6-1O                | 16.99 | 14.59 | 14.39 | 15.27 | 17.38 | 15.82 | 15.42 | 15.74 |
| PFBDB-T               | Y11                  | 16.31 | 15.92 | 14.53 | 14.49 | 16.53 | 16.65 | 15.41 | 15.74 |
| PBCT-2F               | BTSe-4F              | 17.27 | 16.84 | 14.53 | 14.74 | 14.10 | 16.95 | 17.33 | 15.74 |
| PTBB-m                | LL4                  | 16.22 | 16.04 | 15.25 | 16.89 | 13.75 | 16.28 | 21.11 | 15.74 |
| PBDTS-Se-<br>TAZ      | BTP-ClBr2            | 15.88 | 16.05 | 14.91 | 16.48 | 15.73 | 15.36 | 12.66 | 15.74 |
| PBFTT                 | HDO-4Cl              | 16.94 | 15.02 | 14.38 | 15.57 | 16.48 | 16.02 | 15.97 | 15.74 |
| PBDTS-TDZ             | BTIC-2Br-<br>m,TPT10 | 16.15 | 16.34 | 15.13 | 15.76 | 14.40 | 16.64 | 15.88 | 15.74 |
| TPD-3F                | AQx                  | 17.05 | 17.49 | 12.97 | 14.20 | 16.73 | 15.96 | 13.24 | 15.74 |
| J52-2F,J52-<br>F,PFBZ | BTP-FCI-FCI          | 15.32 | 16.05 | 15.17 | 15.41 | 16.50 | 15.96 | 14.51 | 15.73 |
| PBCT-2F               | Y26                  | 17.35 | 16.47 | 14.40 | 14.24 | 15.33 | 16.61 | 17.12 | 15.73 |
| PBDTS-TDZ             | PTIC-4Cl             | 16.44 | 15.58 | 15.27 | 16.21 | 14.03 | 16.87 | 15.28 | 15.73 |
| PBDTS-TDZ             | Y9-2Br               | 16.40 | 16.22 | 15.36 | 15.82 | 13.92 | 16.67 | 15.89 | 15.73 |
| PB3T                  | LL3                  | 18.25 | 15.88 | 16.01 | 15.32 | 14.33 | 14.61 | 22.54 | 15.73 |
| TTFQx-T1              | TB-4Cl               | 16.39 | 15.74 | 14.62 | 14.91 | 15.56 | 17.16 | 14.70 | 15.73 |
| PTO2                  | Y26                  | 17.28 | 14.83 | 14.40 | 14.01 | 18.19 | 15.68 | 15.81 | 15.73 |
| J101                  | BTP-ClBr             | 15.87 | 14.11 | 16.57 | 16.92 | 14.86 | 16.05 | 14.34 | 15.73 |
| J61                   | BTIC-2Br-<br>m,TPT10 | 15.79 | 15.86 | 15.59 | 15.15 | 16.53 | 15.46 | 13.79 | 15.73 |
| PDBT-2F               | PTIC-4Cl             | 16.25 | 14.66 | 14.47 | 16.58 | 16.78 | 15.61 | 14.31 | 15.73 |
| SZ5                   | BTSe-4F              | 15.99 | 15.73 | 14.57 | 14.71 | 17.09 | 16.25 | 16.01 | 15.73 |
| 2T-TTC-<br>BDTFT      | BTIC-2Br-<br>m,TPT10 | 16.17 | 15.42 | 14.95 | 14.81 | 16.84 | 16.16 | 15.62 | 15.73 |
| P5T-2F                | Y19                  | 15.85 | 17.10 | 15.34 | 16.35 | 13.50 | 16.21 | 15.87 | 15.73 |
| BO2FC8                | AQx                  | 16.11 | 15.76 | 14.73 | 14.92 | 16.62 | 16.21 | 13.59 | 15.72 |
| PBT1-EH               | BT-BO-<br>L4F,BTP-S7 | 17.35 | 16.24 | 14.02 | 14.73 | 15.60 | 16.40 | 12.08 | 15.72 |
| TTFQx-T1              | PT2IC-4Cl            | 16.09 | 15.05 | 15.03 | 15.37 | 15.72 | 17.08 | 14.41 | 15.72 |
| PBDB-T-2Cl            | Y6-Se                | 16.33 | 16.04 | 14.56 | 15.35 | 15.77 | 16.28 | 15.87 | 15.72 |
| PBDTSF-<br>TZNT       | Y9-2Br               | 15.74 | 14.93 | 14.89 | 15.88 | 16.60 | 16.27 | 15.07 | 15.72 |
| PBBSe-Cl              | BTIC-BO-<br>4Br      | 16.17 | 16.08 | 14.57 | 16.86 | 15.37 | 15.26 | 15.79 | 15.72 |
| P-4FP,P-FP            | BTIC-BO-<br>4Br      | 16.33 | 15.47 | 14.62 | 16.61 | 16.14 | 15.14 | 15.08 | 15.72 |
| TPD-3F                | MS-4Cl               | 16.59 | 14.00 | 15.25 | 15.07 | 16.76 | 16.63 | 14.84 | 15.72 |
| 2T-TTC-<br>BDTFT      | MS-4Cl               | 16.25 | 14.05 | 14.91 | 15.28 | 16.84 | 16.98 | 15.09 | 15.72 |
| PTzBI-oF              | LL3                  | 17.79 | 13.29 | 15.63 | 15.96 | 16.32 | 15.32 | 21.53 | 15.72 |
| PBCT-2F               | BTDTP-4F             | 17.35 | 16.16 | 14.69 | 15.03 | 14.55 | 16.52 | 16.90 | 15.72 |
| W1                    | Y6-1O                | 16.70 | 16.13 | 14.28 | 14.83 | 16.75 | 15.59 | 14.17 | 15.72 |
| PBDT-S-2TC            | A-WSSe-Cl            | 17.61 | 15.94 | 15.05 | 14.40 | 14.95 | 16.33 | 13.09 | 15.71 |
| PBDB-T-SF             | TPQx-6F              | 16.47 | 16.19 | 14.19 | 15.27 | 16.53 | 15.61 | 14.28 | 15.71 |
| PBDTS-Se-<br>TAZ      | BTP-ClBr1            | 15.95 | 16.13 | 14.72 | 16.63 | 15.66 | 15.19 | 12.67 | 15.71 |
| J11                   | BTIC-BO-<br>4Br      | 15.61 | 15.88 | 15.08 | 16.87 | 15.90 | 14.93 | 15.32 | 15.71 |
| PBDB-T-2Cl            | BTIC-2Cl-<br>yCF3    | 15.95 | 16.18 | 14.69 | 15.00 | 16.35 | 16.08 | 15.45 | 15.71 |
| PBZ-ClSi              | Y19                  | 16.51 | 14.35 | 16.10 | 16.22 | 15.63 | 15.44 | 14.42 | 15.71 |

|                   |                  |       |       |       |       |       |       |       |       |
|-------------------|------------------|-------|-------|-------|-------|-------|-------|-------|-------|
| PBDT-S-2TC        | BTP-ClBr2        | 17.80 | 15.80 | 15.02 | 14.47 | 15.08 | 16.09 | 12.80 | 15.71 |
| J52-2F,J52-F,PFBZ | CH1007           | 14.62 | 16.20 | 14.79 | 16.07 | 16.37 | 16.21 | 15.52 | 15.71 |
| W1                | Y9-2Br           | 15.88 | 15.17 | 15.06 | 15.24 | 16.65 | 16.25 | 15.31 | 15.71 |
| 2T-TTC-BDTFT      | BTP-2F-ThCl      | 16.60 | 15.67 | 14.75 | 14.19 | 17.01 | 16.03 | 14.71 | 15.71 |
| PBQ-4F            | Y19              | 16.41 | 15.46 | 14.68 | 14.54 | 16.00 | 17.15 | 14.81 | 15.71 |
| PBBSe-Cl          | BTP-S2           | 16.25 | 15.83 | 15.14 | 16.78 | 15.35 | 14.89 | 15.75 | 15.71 |
| PBB-F             | CH1007           | 16.04 | 17.70 | 12.32 | 15.07 | 16.39 | 16.71 | 18.34 | 15.70 |
| PFOPB             | BP5T-4F          | 16.93 | 15.90 | 14.15 | 15.66 | 16.72 | 14.86 | 15.33 | 15.70 |
| PBTA-PSF          | BTIC-BO-4Br      | 16.07 | 16.15 | 13.94 | 17.15 | 16.11 | 14.79 | 14.02 | 15.70 |
| PBT-Cl            | A-WSSe-Cl        | 15.79 | 15.73 | 15.55 | 16.38 | 14.12 | 16.65 | 15.62 | 15.70 |
| PBT1-EH           | Y6-2Se           | 16.53 | 16.82 | 13.85 | 15.51 | 15.21 | 16.29 | 13.40 | 15.70 |
| BO2FC8            | MS-4Cl           | 16.09 | 13.88 | 15.33 | 15.58 | 16.52 | 16.81 | 14.94 | 15.70 |
| PBCIT,PCE10-2Cl   | A-WSSe-Cl        | 16.82 | 15.04 | 14.58 | 16.14 | 16.39 | 15.23 | 15.98 | 15.70 |
| PCl(4)BDB-T       | BTP-ClBr2        | 15.94 | 16.12 | 15.44 | 16.13 | 14.31 | 16.26 | 15.83 | 15.70 |
| PBQx-TF           | BTDTTP-4F        | 16.77 | 17.34 | 12.26 | 16.21 | 17.57 | 14.04 | 16.61 | 15.70 |
| PDBT-2F           | Y6-Se            | 16.83 | 14.52 | 13.92 | 16.07 | 17.13 | 15.74 | 15.08 | 15.70 |
| 2T-TTC-BDTFT      | Y9-2Br           | 16.21 | 15.28 | 15.07 | 14.75 | 16.68 | 16.19 | 15.45 | 15.70 |
| PCl(4)BDB-T       | BTP-S2           | 16.13 | 16.03 | 15.71 | 16.27 | 13.75 | 16.29 | 15.83 | 15.70 |
| PBDB-TSCl         | Y9-2Br           | 16.46 | 14.97 | 15.12 | 15.74 | 16.59 | 15.30 | 15.46 | 15.70 |
| PBDTS-Se-TAZ      | Y9-2Br           | 15.72 | 15.82 | 14.92 | 15.70 | 16.34 | 15.67 | 13.42 | 15.69 |
| J52-2F,J52-F,PFBZ | PT2IC-4Cl        | 15.67 | 14.62 | 15.32 | 16.08 | 16.21 | 16.26 | 14.69 | 15.69 |
| PBDTSF-TZNT       | PT2IC-4Cl        | 15.65 | 14.03 | 14.87 | 16.67 | 16.40 | 16.52 | 14.15 | 15.69 |
| J62               | MS-4Cl           | 16.12 | 13.98 | 15.24 | 15.81 | 16.95 | 16.04 | 12.96 | 15.69 |
| P-4FP,P-FP        | BTP-S2           | 16.49 | 14.94 | 15.14 | 16.54 | 16.22 | 14.81 | 15.08 | 15.69 |
| SZ5               | Y9-2Br           | 16.35 | 15.05 | 15.15 | 15.32 | 16.46 | 15.81 | 15.86 | 15.69 |
| PTQ11             | BTP-ClBr         | 17.07 | 15.71 | 15.33 | 15.78 | 16.25 | 13.99 | 13.52 | 15.69 |
| PBTA-PSF          | BTP-S2           | 16.08 | 15.60 | 14.68 | 16.97 | 16.28 | 14.52 | 14.05 | 15.69 |
| PBFTT             | PT2IC-4Cl        | 16.56 | 14.64 | 14.94 | 15.88 | 16.37 | 15.74 | 15.14 | 15.69 |
| PBBSe-Cl          | BO-4Cl           | 15.81 | 16.04 | 14.96 | 16.35 | 15.59 | 15.37 | 15.65 | 15.69 |
| J101              | BTP-ClBr2        | 15.89 | 13.95 | 16.41 | 16.86 | 15.01 | 15.97 | 14.09 | 15.68 |
| D18               | BTTPC-Br         | 15.31 | 14.91 | 15.32 | 16.05 | 16.21 | 16.30 | 16.30 | 15.68 |
| BSCl-C2           | A-WSSe-Cl        | 17.48 | 14.94 | 15.08 | 15.17 | 15.85 | 15.57 | 13.96 | 15.68 |
| PBDB-T-2Cl        | BTIC-2Br-m,TPT10 | 15.99 | 15.29 | 15.31 | 15.46 | 16.28 | 15.75 | 15.67 | 15.68 |
| PTO2              | Y9-2Br           | 16.36 | 14.84 | 15.02 | 15.03 | 16.54 | 16.28 | 16.25 | 15.68 |
| J61               | SY3              | 15.80 | 15.88 | 15.58 | 15.16 | 16.30 | 15.36 | 13.36 | 15.68 |
| TTFQx-T1          | CH1007           | 16.20 | 15.32 | 14.71 | 15.07 | 15.57 | 17.19 | 14.87 | 15.68 |
| PBDB-T-2Cl        | Y6-2Se           | 15.14 | 16.51 | 14.75 | 15.56 | 16.27 | 15.85 | 15.39 | 15.68 |
| 2T-TTC-BDTFT      | BT-BO-L4F,BTP-S7 | 16.52 | 15.62 | 13.81 | 14.27 | 17.15 | 16.69 | 14.45 | 15.68 |
| BO2FC8            | L8-BO            | 15.96 | 16.11 | 14.87 | 14.47 | 16.43 | 16.22 | 14.14 | 15.68 |
| PBT-Cl            | BTP-ClBr2        | 15.75 | 15.64 | 15.45 | 16.40 | 14.40 | 16.42 | 15.28 | 15.68 |
| PBDTSF-TZNT       | SY3              | 15.43 | 14.54 | 14.76 | 16.17 | 16.69 | 16.46 | 14.56 | 15.68 |
| PBDB-TSCl         | BTDTTP-4F        | 16.76 | 14.74 | 14.75 | 15.53 | 17.08 | 15.20 | 14.95 | 15.68 |
| J91               | LL3              | 17.09 | 14.37 | 15.21 | 16.06 | 16.43 | 14.89 | 24.20 | 15.68 |

|                              |                      |       |       |       |       |       |       |       |       |
|------------------------------|----------------------|-------|-------|-------|-------|-------|-------|-------|-------|
| J61                          | TB-4Cl               | 16.30 | 16.33 | 15.27 | 15.16 | 15.91 | 15.09 | 12.97 | 15.68 |
| PBT-Cl                       | BTP-ClBr             | 15.66 | 15.79 | 15.66 | 16.46 | 14.29 | 16.20 | 15.45 | 15.68 |
| PFBDB-T                      | BTIC-2Br-<br>m,TPT10 | 15.85 | 15.54 | 15.21 | 15.04 | 16.45 | 15.96 | 15.63 | 15.68 |
| J52-2Cl                      | LL3-2Cl              | 16.12 | 15.26 | 15.05 | 15.70 | 16.23 | 15.71 | 14.73 | 15.68 |
| PFBDB-T                      | Y6-2Se               | 15.23 | 16.67 | 14.26 | 15.09 | 16.61 | 16.18 | 15.35 | 15.68 |
| PBTA-PSF                     | Y9-2Br               | 15.52 | 15.58 | 14.88 | 15.75 | 16.81 | 15.50 | 14.34 | 15.67 |
| PBB-F                        | BTP-FCI-FCI          | 16.12 | 17.10 | 13.52 | 14.62 | 16.66 | 16.02 | 17.11 | 15.67 |
| J62                          | BTIC-2Cl-<br>yCF3    | 15.61 | 16.73 | 14.66 | 14.83 | 16.17 | 16.04 | 11.92 | 15.67 |
| PTQ11                        | A-WSSe-Cl            | 16.98 | 15.72 | 15.20 | 15.57 | 16.20 | 14.36 | 12.76 | 15.67 |
| D18                          | BTN-4F               | 15.97 | 16.12 | 14.11 | 14.57 | 18.44 | 14.82 | 16.32 | 15.67 |
| PBFTT                        | BP5T-4F              | 17.06 | 16.39 | 14.12 | 15.18 | 16.09 | 15.20 | 14.89 | 15.67 |
| PBT-SF                       | BTN-4F               | 15.56 | 15.75 | 14.59 | 14.37 | 17.91 | 15.84 | 13.73 | 15.67 |
| PBT1-EH                      | Y11                  | 17.75 | 16.28 | 14.15 | 14.81 | 14.65 | 16.37 | 12.78 | 15.67 |
| PBDTS-Se-<br>TAZ             | LL3-2Cl              | 16.27 | 15.95 | 14.71 | 16.30 | 15.58 | 15.21 | 12.49 | 15.67 |
| J52-2Cl                      | BO-4Cl               | 15.65 | 15.00 | 15.12 | 16.19 | 16.38 | 15.66 | 14.85 | 15.67 |
| 2T-TTC-<br>BDTFT             | Y6-BO                | 16.43 | 15.31 | 13.96 | 14.11 | 17.37 | 16.83 | 14.45 | 15.67 |
| 2T-TTC-<br>BDTFT             | Y12                  | 16.43 | 15.31 | 13.96 | 14.11 | 17.37 | 16.83 | 14.45 | 15.67 |
| PDTB-EF-T                    | BTP-2Cl-<br>delta,H2 | 15.77 | 14.93 | 14.91 | 15.34 | 16.88 | 16.16 | 15.17 | 15.67 |
| HFQx-T                       | BO-4Cl               | 16.28 | 15.16 | 14.58 | 15.47 | 15.77 | 16.73 | 14.17 | 15.66 |
| PDTB-EF-T                    | eC9-2Cl              | 15.90 | 14.74 | 14.85 | 15.48 | 16.88 | 16.13 | 15.27 | 15.66 |
| PBBSe-Cl                     | LL3-2Cl              | 16.04 | 16.16 | 14.86 | 15.92 | 15.57 | 15.44 | 15.45 | 15.66 |
| TTFQx-T1                     | SY3                  | 15.99 | 15.46 | 14.79 | 14.92 | 16.04 | 16.77 | 14.76 | 15.66 |
| BSCI-C2                      | BTP-S2               | 17.95 | 14.06 | 15.48 | 15.37 | 15.67 | 15.43 | 13.65 | 15.66 |
| PFOPB                        | ABP4T-4F             | 16.88 | 15.82 | 14.16 | 15.43 | 16.75 | 14.93 | 15.27 | 15.66 |
| BO2FC8                       | Y18                  | 16.47 | 15.73 | 14.79 | 14.33 | 16.46 | 16.17 | 14.24 | 15.66 |
| P_chen,P105                  | LL4                  | 16.70 | 15.28 | 15.37 | 16.31 | 15.91 | 14.37 | 22.51 | 15.66 |
| PBDTS-TDZ                    | MS-4Cl               | 16.35 | 14.90 | 15.25 | 16.17 | 14.26 | 17.01 | 15.57 | 15.66 |
| PTO2                         | BTDT-4F              | 17.08 | 14.60 | 14.72 | 14.72 | 17.35 | 15.46 | 15.64 | 15.66 |
| PDBT-Cl                      | BTN-4F               | 16.52 | 15.40 | 14.87 | 14.35 | 17.11 | 15.69 | 15.20 | 15.66 |
| PFBDB-T                      | BTIC-2Cl-<br>yCF3    | 16.06 | 16.34 | 14.35 | 14.55 | 16.19 | 16.44 | 15.40 | 15.66 |
| BSFTR                        | S-WSeSe-Cl           | 17.68 | 16.02 | 14.79 | 14.16 | 15.55 | 15.73 | 14.01 | 15.66 |
| PDBT-2F                      | SY3                  | 15.84 | 15.19 | 14.24 | 16.24 | 17.13 | 15.29 | 14.57 | 15.65 |
| PBTA-PSF                     | BO-4Cl               | 15.65 | 15.74 | 14.89 | 16.40 | 16.37 | 14.87 | 13.53 | 15.65 |
| J101                         | A-WSSe-Cl            | 16.04 | 13.75 | 16.48 | 16.86 | 14.62 | 16.17 | 14.47 | 15.65 |
| PBTA-PSF                     | Y19                  | 15.96 | 15.97 | 14.49 | 16.46 | 16.18 | 14.85 | 13.60 | 15.65 |
| L810                         | LL3-2Cl              | 16.10 | 15.26 | 15.04 | 15.65 | 16.19 | 15.68 | 14.72 | 15.65 |
| J52-2F,J52-<br>F,PFBZ        | SY3                  | 15.42 | 15.19 | 15.08 | 15.59 | 16.52 | 16.10 | 14.99 | 15.65 |
| BO2FC8                       | AQx-2                | 16.50 | 15.57 | 14.80 | 14.40 | 16.39 | 16.24 | 14.08 | 15.65 |
| SZ5                          | Y26                  | 16.75 | 15.36 | 14.50 | 14.18 | 17.31 | 15.79 | 15.82 | 15.65 |
| PCl(4)BDB-<br>T              | BTP-ClBr             | 15.91 | 15.90 | 15.66 | 16.20 | 14.22 | 16.02 | 15.80 | 15.65 |
| PBBSe-Cl                     | BTP-eC9              | 15.68 | 16.07 | 14.89 | 16.34 | 15.63 | 15.28 | 15.58 | 15.65 |
| PBBSe-Cl                     | BTP-4Cl,eC9          | 15.68 | 16.07 | 14.89 | 16.34 | 15.63 | 15.28 | 15.58 | 15.65 |
| PBDB-<br>T2F,PM6,PB<br>DB-TF | eC9-2Cl              | 16.17 | 14.43 | 15.30 | 15.38 | 16.68 | 15.93 | 15.18 | 15.65 |
| SM1-F                        | A-WSSe-Cl            | 16.75 | 15.89 | 14.75 | 14.27 | 15.77 | 16.47 | 16.10 | 15.65 |

|              |                  |       |       |       |       |       |       |       |       |
|--------------|------------------|-------|-------|-------|-------|-------|-------|-------|-------|
| PBT1-EH      | Y6-Se            | 17.58 | 16.20 | 13.70 | 15.18 | 14.70 | 16.54 | 14.72 | 15.65 |
| PBDTSF-TZNT  | MS-4Cl           | 16.22 | 12.89 | 14.93 | 16.59 | 16.76 | 16.49 | 14.45 | 15.65 |
| J52-C1       | BO-4Cl           | 15.59 | 14.89 | 14.98 | 16.16 | 16.34 | 15.94 | 14.65 | 15.65 |
| TPD-3F       | BTP-6F           | 16.64 | 17.19 | 13.27 | 13.73 | 17.56 | 15.50 | 13.64 | 15.65 |
| J52-C1       | LL3-2Cl          | 16.07 | 15.15 | 14.92 | 15.64 | 16.14 | 15.97 | 14.54 | 15.65 |
| PBT-C1       | BTIC-BO-4Br      | 15.92 | 15.67 | 15.32 | 16.65 | 14.14 | 16.19 | 15.30 | 15.65 |
| QX2          | S-WSeSe-Cl       | 15.72 | 15.31 | 14.70 | 16.52 | 15.43 | 16.20 | 14.18 | 15.65 |
| PBZ-CISi     | SY3              | 15.45 | 14.14 | 16.25 | 16.16 | 16.13 | 15.73 | 14.41 | 15.65 |
| PFOPB        | AQx              | 17.00 | 15.91 | 13.92 | 15.60 | 16.32 | 15.11 | 14.60 | 15.64 |
| PCl(4)BDB-T  | BTP-ClBr1        | 15.86 | 16.11 | 15.30 | 16.21 | 14.12 | 16.27 | 15.83 | 15.64 |
| BO2FC8       | Y12              | 16.06 | 15.56 | 14.86 | 14.57 | 16.71 | 16.11 | 14.26 | 15.64 |
| PBDB-T-2Cl   | BPS-4F           | 15.35 | 16.37 | 14.50 | 15.71 | 16.30 | 15.64 | 16.11 | 15.64 |
| BO2FC8       | Y6-BO            | 16.06 | 15.56 | 14.86 | 14.57 | 16.71 | 16.11 | 14.26 | 15.64 |
| J11          | LL3-2Cl          | 16.18 | 15.88 | 15.10 | 15.77 | 15.78 | 15.15 | 14.95 | 15.64 |
| PTQ11        | BTP-ClBr2        | 17.03 | 15.61 | 15.11 | 15.64 | 16.33 | 14.14 | 12.47 | 15.64 |
| PBN-S        | BTTPC-Br         | 15.36 | 14.51 | 15.16 | 16.37 | 15.95 | 16.52 | 15.36 | 15.64 |
| PBQx-TF      | BTIC-F-m         | 16.76 | 18.04 | 12.29 | 15.43 | 16.37 | 14.96 | 16.58 | 15.64 |
| L810         | BO-4Cl           | 15.62 | 15.00 | 15.12 | 16.13 | 16.35 | 15.63 | 14.84 | 15.64 |
| TTFQx-T1     | HDO-4Cl          | 16.20 | 15.09 | 14.50 | 15.03 | 15.68 | 17.35 | 14.85 | 15.64 |
| P5T-2F       | PT2IC-4Cl        | 15.48 | 15.91 | 15.59 | 16.81 | 14.03 | 16.03 | 15.46 | 15.64 |
| PBB-F        | SY1              | 16.45 | 16.96 | 13.22 | 14.25 | 16.61 | 16.34 | 16.77 | 15.64 |
| PBDB-T-2Cl   | Y9-2Br           | 16.20 | 15.08 | 15.36 | 15.37 | 16.00 | 15.83 | 15.50 | 15.64 |
| PBDT-S-2TC   | BTP-ClBr1        | 17.64 | 15.71 | 14.86 | 14.63 | 14.96 | 16.03 | 12.82 | 15.64 |
| J61          | PT2IC-4Cl        | 15.93 | 15.42 | 15.72 | 15.56 | 16.25 | 14.95 | 12.99 | 15.64 |
| PBDTSF-TZNT  | TB-4Cl           | 15.72 | 14.51 | 14.44 | 16.27 | 16.34 | 16.55 | 14.43 | 15.64 |
| PDBT-C1      | Y9-2Br           | 16.23 | 14.95 | 15.07 | 15.45 | 16.57 | 15.55 | 15.57 | 15.64 |
| PBDTS-TDZ    | HDO-4Cl          | 16.13 | 15.79 | 15.13 | 15.91 | 13.87 | 16.98 | 15.87 | 15.64 |
| PFBDB-T      | Y9-2Br           | 15.96 | 15.28 | 15.28 | 14.95 | 16.34 | 16.00 | 15.44 | 15.63 |
| PFOPB        | L8-BO            | 16.91 | 16.04 | 14.08 | 15.11 | 16.53 | 15.13 | 15.29 | 15.63 |
| PBDB-T-2Cl   | BT-BO-L4F,BTP-S7 | 15.69 | 15.67 | 14.91 | 15.03 | 16.55 | 15.95 | 15.30 | 15.63 |
| J61          | BTP-S9           | 15.99 | 16.74 | 15.26 | 14.98 | 16.21 | 14.62 | 12.13 | 15.63 |
| 2T-TTC-BDTFT | Y18              | 16.76 | 15.43 | 13.55 | 13.97 | 17.09 | 16.98 | 14.36 | 15.63 |
| PBT1-EH      | BPS-4F           | 16.72 | 16.65 | 13.63 | 15.25 | 15.41 | 16.11 | 13.24 | 15.63 |
| PBDT-3TCO    | TB-4Cl           | 16.47 | 16.07 | 14.34 | 14.12 | 17.19 | 15.58 | 16.45 | 15.63 |
| PTO2         | MS-4Cl           | 16.35 | 13.07 | 14.84 | 15.76 | 17.11 | 16.65 | 16.00 | 15.63 |
| J11          | BO-4Cl           | 15.51 | 15.67 | 15.16 | 16.45 | 15.92 | 15.07 | 15.07 | 15.63 |
| 2T-TTC-BDTFT | L8-BO            | 16.34 | 15.81 | 13.67 | 14.07 | 16.96 | 16.91 | 14.31 | 15.63 |
| BO2FC8       | BP5T-4F          | 15.94 | 15.47 | 14.93 | 14.80 | 16.55 | 16.05 | 14.12 | 15.63 |
| BSCI-C2      | BTP-ClBr2        | 17.64 | 14.79 | 15.00 | 15.18 | 15.85 | 15.30 | 13.60 | 15.62 |
| PBDTSF-TZNT  | PTIC-4Cl         | 15.75 | 13.88 | 14.79 | 16.53 | 16.34 | 16.44 | 14.08 | 15.62 |
| W1           | Y26              | 16.70 | 16.12 | 14.29 | 14.22 | 16.87 | 15.55 | 13.88 | 15.62 |
| BO2FC8       | Y22              | 16.50 | 15.74 | 14.80 | 14.08 | 16.50 | 16.11 | 14.08 | 15.62 |
| D18          | Y6-O             | 16.25 | 16.11 | 13.10 | 14.25 | 18.53 | 15.49 | 17.44 | 15.62 |
| PBDT-S-2TC   | BTIC-BO-4Br      | 17.97 | 15.58 | 14.47 | 15.00 | 14.86 | 15.84 | 13.11 | 15.62 |
| HFQx-T       | LL3-2Cl          | 16.41 | 15.33 | 14.50 | 15.08 | 15.63 | 16.76 | 14.04 | 15.62 |

|                   |                  |       |       |       |       |       |       |       |       |
|-------------------|------------------|-------|-------|-------|-------|-------|-------|-------|-------|
| PBDB-T-2Cl        | Y11              | 16.23 | 15.90 | 14.83 | 14.92 | 15.64 | 16.19 | 15.45 | 15.62 |
| 2T-TTC-BDTFT      | BP5T-4F          | 16.36 | 15.21 | 13.74 | 14.34 | 17.03 | 17.03 | 14.30 | 15.62 |
| PBDB-TSCl         | AQx-2            | 16.45 | 14.95 | 14.57 | 15.33 | 16.73 | 15.68 | 14.87 | 15.62 |
| J52-2F,J52-F,PFBZ | HDO-4Cl          | 15.64 | 14.85 | 14.79 | 15.75 | 16.22 | 16.45 | 15.18 | 15.62 |
| PBDS-TZ           | LL3              | 18.75 | 13.16 | 15.02 | 15.60 | 15.07 | 16.09 | 25.54 | 15.62 |
| SM1-F             | BTP-ClBr         | 16.84 | 15.72 | 14.93 | 14.27 | 15.90 | 16.03 | 15.88 | 15.62 |
| PTO2              | AQx-2            | 16.60 | 15.11 | 14.58 | 14.50 | 16.73 | 16.17 | 15.55 | 15.62 |
| PBDTS-Se-TAZ      | BTIC-BO-4Br      | 16.13 | 16.18 | 13.93 | 16.92 | 15.51 | 15.02 | 12.93 | 15.62 |
| PFOPB             | Y18              | 17.31 | 15.83 | 13.96 | 14.92 | 16.61 | 15.06 | 15.23 | 15.62 |
| PBT-Cl            | BTP-ClBr1        | 15.70 | 15.65 | 15.34 | 16.47 | 14.14 | 16.40 | 15.23 | 15.62 |
| PBDTSF-TZNT       | BTIC-2Br-m,TPT10 | 15.36 | 14.96 | 14.60 | 15.91 | 16.74 | 16.11 | 14.95 | 15.61 |
| PBFTT             | Y6-2Se           | 16.00 | 16.22 | 14.96 | 15.36 | 15.88 | 15.26 | 15.06 | 15.61 |
| P5T-2F            | Y9-2Br           | 15.79 | 16.23 | 15.52 | 15.88 | 14.22 | 16.05 | 15.59 | 15.61 |
| PFOPB             | N3               | 16.96 | 15.61 | 14.11 | 15.25 | 16.89 | 14.86 | 15.23 | 15.61 |
| PCl(4)BDB-T       | BO-4Cl           | 15.71 | 16.14 | 15.26 | 15.87 | 14.16 | 16.54 | 15.72 | 15.61 |
| W1                | AQx-2            | 16.23 | 16.13 | 14.45 | 14.75 | 16.12 | 16.00 | 13.92 | 15.61 |
| PE4               | BTIC-2Cl-yCF3    | 15.31 | 15.88 | 14.70 | 15.16 | 16.82 | 15.80 | 14.95 | 15.61 |
| 2T-TTC-BDTFT      | BPS-4F           | 16.03 | 16.20 | 13.43 | 14.73 | 17.10 | 16.18 | 15.44 | 15.61 |
| TTFQx-T1          | PTIC-4Cl         | 16.19 | 14.88 | 14.91 | 15.21 | 15.56 | 16.91 | 14.31 | 15.61 |
| PBDB-TSCl         | Y26              | 17.02 | 14.92 | 14.40 | 14.71 | 17.43 | 15.17 | 14.95 | 15.61 |
| TTFQx-T1          | BTP-FCI-FCI      | 16.38 | 15.04 | 14.88 | 14.55 | 15.70 | 17.10 | 14.15 | 15.61 |
| PBDTT1Cl          | LL3              | 17.25 | 15.49 | 15.51 | 15.76 | 14.90 | 14.75 | 24.06 | 15.61 |
| PTQ11             | BTIC-BO-4Br      | 17.19 | 15.77 | 14.76 | 16.03 | 16.11 | 13.79 | 12.78 | 15.61 |
| SM1-F             | BTP-ClBr2        | 16.83 | 15.67 | 14.72 | 14.25 | 15.95 | 16.23 | 15.84 | 15.61 |
| PE4               | Y6-Se            | 15.73 | 15.26 | 14.68 | 15.55 | 16.44 | 15.98 | 15.97 | 15.61 |
| J101              | Y9-2Br           | 16.18 | 14.44 | 16.43 | 15.42 | 15.03 | 16.14 | 14.24 | 15.61 |
| PFBDB-T           | BTP-2F-ThCl      | 16.01 | 15.74 | 15.23 | 14.46 | 16.44 | 15.75 | 15.07 | 15.61 |
| TPD-3F            | Y26              | 17.27 | 16.74 | 13.14 | 13.32 | 17.48 | 15.68 | 13.60 | 15.61 |
| PBDB-T-SF         | BDTP-4F          | 16.00 | 15.11 | 14.91 | 15.29 | 17.36 | 14.96 | 15.01 | 15.60 |
| PBT-Cl            | BTP-S2           | 15.77 | 15.00 | 16.24 | 16.56 | 13.81 | 16.26 | 15.33 | 15.60 |
| PDBT-F            | eC9-2Cl          | 16.20 | 14.54 | 14.98 | 15.50 | 16.78 | 15.62 | 15.20 | 15.60 |
| P2F-EHp           | LL3              | 18.21 | 12.29 | 15.66 | 16.31 | 16.45 | 14.70 | 23.86 | 15.60 |
| BSCl-C2           | BTIC-BO-4Br      | 17.89 | 14.65 | 14.79 | 15.45 | 15.68 | 15.15 | 13.62 | 15.60 |
| H13               | LL4              | 16.31 | 15.28 | 15.46 | 15.70 | 15.35 | 15.50 | 24.24 | 15.60 |
| J52-2Cl           | BTP-eC9          | 15.49 | 15.03 | 15.07 | 16.16 | 16.27 | 15.59 | 14.77 | 15.60 |
| J52-2Cl           | BTP-4Cl,eC9      | 15.49 | 15.03 | 15.07 | 16.16 | 16.27 | 15.59 | 14.77 | 15.60 |
| PBBSe-Cl          | Y19              | 15.94 | 16.17 | 14.75 | 15.82 | 15.58 | 15.34 | 15.39 | 15.60 |
| P-4FP,P-FP        | BO-4Cl           | 15.99 | 15.06 | 15.04 | 16.13 | 16.09 | 15.28 | 14.88 | 15.60 |
| PDBT-F            | BTP-2Cl-delta,H2 | 16.10 | 14.80 | 15.03 | 15.31 | 16.70 | 15.65 | 15.09 | 15.60 |
| W1                | BDTP-4F          | 16.66 | 15.82 | 14.59 | 14.98 | 16.32 | 15.22 | 13.71 | 15.60 |
| PTQ11             | BTP-ClBr1        | 16.92 | 15.74 | 14.97 | 15.77 | 16.21 | 13.97 | 12.50 | 15.60 |
| PBDB-T-2Cl        | MS-4Cl           | 16.02 | 14.02 | 15.18 | 15.96 | 16.04 | 16.34 | 15.30 | 15.59 |
| P5T-2F            | SY3              | 15.23 | 16.40 | 15.44 | 16.31 | 14.00 | 16.18 | 15.68 | 15.59 |
| TPD-3F            | Y6-1O            | 16.73 | 17.09 | 13.15 | 13.63 | 17.32 | 15.62 | 13.77 | 15.59 |

|                   |                  |       |       |       |       |       |       |       |       |
|-------------------|------------------|-------|-------|-------|-------|-------|-------|-------|-------|
| PBDB-T-2Cl        | BTP-2F-ThCl      | 15.88 | 15.83 | 15.48 | 14.89 | 16.09 | 15.38 | 15.10 | 15.59 |
| PBFTT             | PTIC-4Cl         | 16.74 | 14.45 | 14.82 | 15.71 | 16.21 | 15.61 | 15.01 | 15.59 |
| TPD-3F            | BTSe-4F          | 16.51 | 17.36 | 12.77 | 13.69 | 16.98 | 16.22 | 13.71 | 15.59 |
| 2T-TTC-BDTFT      | AQx              | 16.40 | 15.37 | 13.51 | 14.45 | 16.84 | 16.96 | 13.71 | 15.59 |
| J52-2Cl           | Y19              | 15.95 | 15.29 | 14.97 | 15.59 | 16.11 | 15.62 | 14.67 | 15.59 |
| PBTA-PSF          | BTP-eC9          | 15.49 | 15.77 | 14.72 | 16.42 | 16.34 | 14.78 | 13.41 | 15.59 |
| PBTA-PSF          | BTP-4Cl,eC9      | 15.49 | 15.77 | 14.72 | 16.42 | 16.34 | 14.78 | 13.41 | 15.59 |
| J101              | BTP-ClBr1        | 16.03 | 13.75 | 16.27 | 16.93 | 14.74 | 15.79 | 14.05 | 15.59 |
| BSCI-C2           | BTP-ClBr         | 17.67 | 14.83 | 15.22 | 15.26 | 15.76 | 14.77 | 13.84 | 15.59 |
| PCI(4)BDB-T       | BTIC-BO-4Br      | 16.08 | 15.90 | 15.10 | 16.39 | 13.96 | 16.08 | 15.87 | 15.59 |
| BSCI-C2           | BTP-ClBr1        | 17.53 | 14.75 | 14.86 | 15.27 | 15.77 | 15.33 | 13.56 | 15.58 |
| HFQx-T            | BTP-4Cl,eC9      | 16.19 | 15.17 | 14.53 | 15.45 | 15.48 | 16.68 | 14.10 | 15.58 |
| HFQx-T            | BTP-eC9          | 16.19 | 15.17 | 14.53 | 15.45 | 15.48 | 16.68 | 14.10 | 15.58 |
| PBCIT,PCE10-2Cl   | BTP-ClBr2        | 16.88 | 14.63 | 14.45 | 16.09 | 16.45 | 15.00 | 15.67 | 15.58 |
| J52-2F,J52-F,PFBZ | PTIC-4Cl         | 15.74 | 14.40 | 15.20 | 15.92 | 16.06 | 16.18 | 14.59 | 15.58 |
| J52-2F,J52-F,PFBZ | SY1              | 15.29 | 15.81 | 15.07 | 14.93 | 16.53 | 15.86 | 14.49 | 15.58 |
| J52-Cl            | BTP-eC9          | 15.42 | 14.92 | 14.94 | 16.12 | 16.21 | 15.87 | 14.58 | 15.58 |
| J52-Cl            | BTP-4Cl,eC9      | 15.42 | 14.92 | 14.94 | 16.12 | 16.21 | 15.87 | 14.58 | 15.58 |
| J61               | PTIC-4Cl         | 16.08 | 15.20 | 15.62 | 15.42 | 16.16 | 15.01 | 12.90 | 15.58 |
| PFOPB             | eC9-2Cl          | 16.29 | 14.34 | 15.16 | 15.42 | 16.60 | 15.66 | 15.15 | 15.58 |
| PBFTT             | SY3              | 16.25 | 15.13 | 14.67 | 15.37 | 16.49 | 15.55 | 15.36 | 15.58 |
| PBDTS-Se-TAZ      | Y19              | 16.10 | 15.97 | 14.54 | 16.27 | 15.48 | 15.10 | 12.37 | 15.58 |
| P5T-2F            | PTIC-4Cl         | 15.56 | 15.72 | 15.52 | 16.63 | 14.04 | 15.99 | 15.34 | 15.58 |
| PBT1-EH           | BTP-2F-ThCl      | 17.04 | 16.14 | 15.01 | 14.74 | 15.08 | 15.46 | 12.95 | 15.58 |
| PCI(4)BDB-T       | BTP-eC9          | 15.58 | 16.17 | 15.19 | 15.84 | 14.19 | 16.49 | 15.66 | 15.58 |
| PCI(4)BDB-T       | BTP-4Cl,eC9      | 15.58 | 16.17 | 15.19 | 15.84 | 14.19 | 16.49 | 15.66 | 15.58 |
| H14               | LL4              | 16.33 | 15.49 | 15.35 | 15.65 | 15.41 | 15.22 | 23.55 | 15.58 |
| PBDB-T-SF         | eC9-2Cl          | 15.84 | 14.63 | 14.99 | 15.73 | 16.93 | 15.32 | 15.29 | 15.57 |
| PTBB-m            | S-WSeSe-Cl       | 15.75 | 17.28 | 14.75 | 15.69 | 13.37 | 16.61 | 13.68 | 15.57 |
| PBT1-EH           | AQx              | 17.27 | 16.23 | 13.69 | 15.04 | 15.05 | 16.16 | 12.16 | 15.57 |
| 2T-TTC-BDTFT      | Y22              | 16.77 | 15.43 | 13.61 | 13.72 | 17.22 | 16.70 | 14.20 | 15.57 |
| PBQx-TF           | BTIC-CF3-y       | 16.25 | 18.99 | 11.49 | 15.16 | 16.28 | 15.28 | 16.81 | 15.57 |
| L810              | BTP-eC9          | 15.45 | 15.03 | 15.06 | 16.10 | 16.23 | 15.56 | 14.76 | 15.57 |
| L810              | BTP-4Cl,eC9      | 15.45 | 15.03 | 15.06 | 16.10 | 16.23 | 15.56 | 14.76 | 15.57 |
| PBDT-3TCO         | CH1007           | 16.16 | 16.58 | 13.15 | 13.88 | 17.89 | 15.77 | 17.47 | 15.57 |
| P-FT              | BTP-S9           | 15.45 | 15.45 | 15.14 | 15.15 | 16.16 | 16.08 | 14.22 | 15.57 |
| PDBT-Cl           | TPQx-6F          | 16.76 | 16.04 | 13.92 | 14.89 | 16.28 | 15.54 | 14.43 | 15.57 |
| PFBDB-T           | BPS-4F           | 15.39 | 16.66 | 14.03 | 15.14 | 16.26 | 15.94 | 16.09 | 15.57 |
| PFOPB             | BTPTT-4F,Y6      | 16.81 | 15.82 | 14.02 | 15.13 | 16.77 | 14.88 | 15.22 | 15.57 |
| PCI(4)BDB-T       | LL3-2Cl          | 15.92 | 16.24 | 15.17 | 15.44 | 14.11 | 16.54 | 15.52 | 15.57 |
| PE4               | SY1              | 15.41 | 15.73 | 15.01 | 14.98 | 16.66 | 15.62 | 14.86 | 15.57 |
| PFOPB             | BTP-2Cl-delta,H2 | 16.18 | 14.60 | 15.21 | 15.22 | 16.53 | 15.67 | 15.00 | 15.57 |
| PTQ11             | BTP-S2           | 17.37 | 15.17 | 15.27 | 15.83 | 16.12 | 13.64 | 12.85 | 15.57 |



|                     |                      |       |       |       |       |       |       |       |       |
|---------------------|----------------------|-------|-------|-------|-------|-------|-------|-------|-------|
| BO2FC8              | ABP4T-4F             | 15.88 | 15.49 | 14.91 | 14.54 | 16.56 | 16.01 | 14.02 | 15.57 |
| PFBDB-T             | BT-BO-<br>L4F,BTP-S7 | 15.82 | 15.74 | 14.42 | 14.60 | 16.44 | 16.38 | 15.27 | 15.57 |
| PFBDB-T             | MS-4Cl               | 15.89 | 13.72 | 15.11 | 15.51 | 16.48 | 16.69 | 15.25 | 15.57 |
| PBQ-4F              | BTP-S9               | 16.16 | 15.37 | 14.51 | 14.36 | 15.94 | 17.05 | 14.41 | 15.57 |
| SM1-F               | BTP-ClBr1            | 16.68 | 15.74 | 14.53 | 14.29 | 15.93 | 16.22 | 15.79 | 15.57 |
| J52-Cl              | Y19                  | 15.90 | 15.17 | 14.87 | 15.53 | 16.01 | 15.91 | 14.48 | 15.57 |
| L810                | Y19                  | 15.94 | 15.29 | 14.96 | 15.54 | 16.06 | 15.60 | 14.66 | 15.57 |
| PFBDB-T             | Y12                  | 15.61 | 15.94 | 14.56 | 14.46 | 16.35 | 16.46 | 15.39 | 15.56 |
| PFBDB-T             | Y6-BO                | 15.61 | 15.94 | 14.56 | 14.46 | 16.35 | 16.46 | 15.39 | 15.56 |
| PDBT-2F             | BP5T-4F              | 16.41 | 14.47 | 13.65 | 16.04 | 17.17 | 15.65 | 13.46 | 15.56 |
| PBDT-S-2TC          | LL3-2Cl              | 17.32 | 15.73 | 14.79 | 14.54 | 14.92 | 16.07 | 12.58 | 15.56 |
| PBDTS-TDZ           | BTP-2F-<br>2Cl,SY2   | 16.28 | 16.45 | 14.53 | 15.63 | 13.64 | 16.85 | 15.32 | 15.56 |
| PBDB-T-SF           | BTP-2Cl-<br>delta,H2 | 15.74 | 14.82 | 15.06 | 15.54 | 16.86 | 15.35 | 15.17 | 15.56 |
| PBDTS-Se-<br>TAZ    | BO-4Cl               | 15.69 | 15.78 | 14.93 | 16.15 | 15.66 | 15.16 | 12.24 | 15.56 |
| PFOPB               | Y22                  | 17.32 | 15.63 | 14.02 | 14.68 | 16.67 | 15.05 | 15.22 | 15.56 |
| PDBT-Cl             | Y6-O                 | 16.88 | 15.53 | 13.06 | 14.25 | 17.27 | 16.37 | 16.20 | 15.56 |
| P-4FP,P-FP          | LL3-2Cl              | 16.18 | 15.27 | 14.94 | 15.66 | 15.96 | 15.34 | 14.74 | 15.56 |
| BSFTR               | LL3                  | 18.00 | 14.34 | 15.55 | 14.49 | 15.74 | 15.23 | 21.56 | 15.56 |
| J11                 | BTP-eC9              | 15.31 | 15.74 | 15.12 | 16.40 | 15.80 | 14.99 | 15.00 | 15.56 |
| J11                 | BTP-4Cl,eC9          | 15.31 | 15.74 | 15.12 | 16.40 | 15.80 | 14.99 | 15.00 | 15.56 |
| PBT-SF              | TPQx-6F              | 16.28 | 16.03 | 13.44 | 14.81 | 16.98 | 15.80 | 13.26 | 15.56 |
| PDBT-2F             | Y6-2Se               | 15.23 | 15.43 | 14.52 | 16.23 | 17.10 | 14.82 | 14.18 | 15.56 |
| PBCIT,PCE1<br>0-2Cl | BTP-ClBr1            | 16.81 | 14.65 | 14.34 | 16.16 | 16.42 | 14.96 | 15.66 | 15.56 |
| PBCT-2F             | AQx-2                | 16.66 | 16.58 | 14.61 | 14.83 | 13.61 | 17.03 | 16.68 | 15.55 |
| BO2FC8              | BTSe-4F              | 15.49 | 15.85 | 14.64 | 14.18 | 16.69 | 16.48 | 14.19 | 15.55 |
| J11                 | Y19                  | 15.99 | 15.94 | 15.03 | 15.67 | 15.61 | 15.07 | 14.89 | 15.55 |
| PBFTT               | Y12                  | 17.06 | 16.22 | 13.72 | 14.97 | 16.35 | 15.00 | 14.98 | 15.55 |
| PBFTT               | Y6-BO                | 17.06 | 16.22 | 13.72 | 14.97 | 16.35 | 15.00 | 14.98 | 15.55 |
| PBDT-3TCO           | BTP-S9               | 16.51 | 15.94 | 14.18 | 13.80 | 17.55 | 15.33 | 16.40 | 15.55 |
| BSCl-C2             | LL3                  | 17.86 | 14.01 | 15.95 | 14.92 | 15.75 | 14.82 | 23.70 | 15.55 |
| BO2FC8              | N3                   | 16.01 | 15.46 | 14.88 | 14.44 | 16.58 | 15.94 | 13.99 | 15.55 |
| PBDB-T-2Cl          | AQx                  | 15.42 | 15.98 | 14.58 | 15.21 | 16.03 | 16.10 | 14.54 | 15.55 |
| PBDTTAZ-<br>NaPh    | LL4                  | 17.00 | 15.51 | 13.84 | 18.18 | 16.35 | 12.42 | 20.27 | 15.55 |
| P5T-2F              | BTIC-2Br-<br>m,TPT10 | 15.26 | 16.34 | 15.34 | 16.07 | 14.37 | 15.92 | 15.77 | 15.55 |
| PE4                 | MS-4Cl               | 15.90 | 13.58 | 14.93 | 15.94 | 16.95 | 16.00 | 15.05 | 15.55 |
| PBDT-3TCO           | SY3                  | 16.23 | 15.56 | 14.73 | 13.95 | 17.07 | 15.77 | 16.28 | 15.55 |
| m-PBDTPS-<br>FTAZ   | LL4                  | 16.16 | 15.47 | 14.72 | 16.87 | 15.24 | 14.83 | 20.05 | 15.55 |
| J91                 | BTP-S2               | 15.01 | 15.08 | 15.23 | 16.94 | 16.04 | 14.98 | 13.24 | 15.55 |
| P2F-EHp             | A-WSSe-Cl            | 16.26 | 15.59 | 14.85 | 15.59 | 16.08 | 14.92 | 14.13 | 15.55 |
| J61                 | BTP-S1               | 16.39 | 16.51 | 15.25 | 15.48 | 15.57 | 14.09 | 13.08 | 15.55 |
| PFBDB-T             | BP5T-4F              | 15.49 | 16.04 | 14.36 | 14.67 | 16.08 | 16.64 | 15.22 | 15.55 |
| PDTB-EF-T           | BTTPC-Br             | 14.73 | 14.76 | 14.92 | 16.06 | 16.19 | 16.62 | 15.22 | 15.55 |
| TTFQx-T1            | MS-4Cl               | 15.83 | 13.85 | 14.74 | 15.24 | 16.61 | 17.02 | 14.58 | 15.54 |
| PFBDB-T             | AQx                  | 15.61 | 16.06 | 14.13 | 14.76 | 16.13 | 16.58 | 14.50 | 15.54 |
| 2T-TTC-<br>BDTFT    | ABP4T-4F             | 16.28 | 15.22 | 13.75 | 14.07 | 17.12 | 16.82 | 14.21 | 15.54 |

|                   |                  |       |       |       |       |       |       |       |       |
|-------------------|------------------|-------|-------|-------|-------|-------|-------|-------|-------|
| PDBT-Cl           | BDTP-4F          | 16.92 | 14.79 | 14.68 | 14.91 | 17.03 | 14.94 | 15.11 | 15.54 |
| PBDTS-Se-TAZ      | BTP-S2           | 16.05 | 15.62 | 14.67 | 16.74 | 15.44 | 14.74 | 13.02 | 15.54 |
| PBQx-TF           | Y6-O             | 16.33 | 17.43 | 12.28 | 15.24 | 17.83 | 14.15 | 17.53 | 15.54 |
| PBFTT             | ABP4T-4F         | 16.95 | 16.32 | 13.92 | 14.96 | 16.13 | 14.98 | 14.78 | 15.54 |
| QX2               | BTP-S2           | 15.52 | 14.47 | 15.21 | 16.53 | 15.53 | 15.97 | 13.21 | 15.54 |
| PBT1-EH           | eC9-2Cl          | 16.54 | 14.92 | 15.24 | 15.20 | 15.38 | 15.95 | 14.04 | 15.54 |
| P5T-2F            | MS-4Cl           | 15.81 | 14.64 | 15.39 | 16.55 | 14.79 | 16.05 | 15.26 | 15.54 |
| PBFTT             | BTP-6F           | 17.01 | 16.23 | 13.54 | 15.16 | 16.54 | 14.75 | 14.82 | 15.54 |
| PFOPB             | BTP-6F           | 16.53 | 15.60 | 14.21 | 15.53 | 16.81 | 14.55 | 15.31 | 15.54 |
| PBT1-EH           | BTP-2Cl-delta,H2 | 16.43 | 15.09 | 15.31 | 15.05 | 15.36 | 15.98 | 13.93 | 15.54 |
| PBCT-2F           | Y9-2Br           | 16.29 | 15.64 | 15.41 | 15.31 | 13.99 | 16.57 | 16.92 | 15.54 |
| TTFQx-T1          | SY1              | 16.26 | 15.48 | 14.81 | 14.17 | 15.93 | 16.55 | 14.26 | 15.54 |
| PBCIT,PCE1 0-2Cl  | BTP-ClBr         | 16.93 | 14.41 | 14.67 | 16.14 | 16.40 | 14.66 | 15.62 | 15.53 |
| J91               | S-WSeSe-Cl       | 14.69 | 15.51 | 14.69 | 16.93 | 16.03 | 15.35 | 14.30 | 15.53 |
| PBDT-3TCO         | BTP-S1           | 16.61 | 15.62 | 14.30 | 14.49 | 17.56 | 14.62 | 16.77 | 15.53 |
| QX2               | LL4              | 15.84 | 15.11 | 15.20 | 16.04 | 15.61 | 15.38 | 23.02 | 15.53 |
| PBN-S             | BTIC-CF3-y       | 16.89 | 15.84 | 14.27 | 14.22 | 16.19 | 15.76 | 15.39 | 15.53 |
| TTFQx-T1          | Y9-2Br           | 15.69 | 15.27 | 14.90 | 14.77 | 16.42 | 16.13 | 14.98 | 15.53 |
| PBCIT,PCE1 0-2Cl  | BTIC-BO-4Br      | 17.12 | 14.35 | 14.32 | 16.27 | 16.34 | 14.77 | 15.68 | 15.53 |
| J101              | BTIC-BO-4Br      | 16.20 | 13.67 | 15.78 | 17.08 | 14.80 | 15.63 | 14.13 | 15.53 |
| TPD-3F            | AQx-2            | 16.99 | 16.95 | 13.08 | 13.73 | 16.38 | 16.02 | 13.49 | 15.52 |
| PBCIT,PCE1 0-2Cl  | LL3              | 17.17 | 13.90 | 15.46 | 15.91 | 16.06 | 14.62 | 28.90 | 15.52 |
| PBT-SF            | Y6-O             | 16.25 | 15.66 | 12.46 | 14.23 | 17.97 | 16.54 | 14.60 | 15.52 |
| 2T-TTC-BDTFT      | N3               | 16.37 | 15.20 | 13.70 | 13.93 | 17.15 | 16.75 | 14.18 | 15.52 |
| PBDT-3TCO         | PT2IC-4Cl        | 16.27 | 15.08 | 14.83 | 14.49 | 16.94 | 15.51 | 16.24 | 15.52 |
| J52-2F,J52-F,PFBZ | BTIC-2Cl-yCF3    | 15.23 | 16.17 | 14.44 | 15.00 | 16.28 | 15.98 | 14.55 | 15.52 |
| J61               | MS-4Cl           | 16.23 | 14.15 | 15.54 | 15.52 | 16.70 | 14.96 | 13.39 | 15.52 |
| P2F-EHp           | BTP-ClBr         | 16.18 | 15.15 | 15.08 | 15.80 | 16.17 | 14.72 | 13.93 | 15.52 |
| P-4FP,P-FP        | BTP-eC9          | 15.85 | 15.12 | 14.97 | 16.11 | 15.83 | 15.21 | 14.79 | 15.51 |
| P-4FP,P-FP        | BTP-4Cl,eC9      | 15.85 | 15.12 | 14.97 | 16.11 | 15.83 | 15.21 | 14.79 | 15.51 |
| P-FT              | TB-4Cl           | 15.68 | 15.18 | 14.99 | 15.14 | 15.84 | 16.24 | 14.48 | 15.51 |
| PBDTSF-TZNT       | HDO-4Cl          | 15.33 | 13.83 | 14.65 | 16.28 | 16.43 | 16.55 | 14.62 | 15.51 |
| PCl(4)BDB-T       | Y19              | 15.81 | 16.26 | 15.11 | 15.32 | 14.10 | 16.47 | 15.47 | 15.51 |
| J61               | BTP-2F-2Cl,SY2   | 15.97 | 16.78 | 15.25 | 14.78 | 15.94 | 14.34 | 11.98 | 15.51 |
| PDBT-F            | BTTPC-Br         | 15.25 | 14.57 | 14.99 | 16.09 | 16.00 | 16.15 | 15.18 | 15.51 |
| PBT1-C-2Cl        | LL4              | 16.03 | 15.71 | 14.90 | 17.24 | 13.31 | 15.85 | 23.90 | 15.51 |
| SM1-F             | BTIC-BO-4Br      | 16.95 | 15.76 | 13.88 | 14.35 | 16.03 | 16.05 | 15.86 | 15.51 |
| PBT1-EH           | BTTPC-Br         | 15.65 | 14.83 | 15.24 | 15.89 | 15.14 | 16.27 | 13.68 | 15.50 |
| PBQ-4F            | PT2IC-4Cl        | 15.95 | 14.53 | 14.93 | 14.69 | 16.01 | 16.91 | 14.45 | 15.50 |
| BO2FC8            | BTPTT-4F,Y6      | 15.78 | 15.55 | 14.84 | 14.35 | 16.53 | 15.98 | 13.93 | 15.50 |
| SZ5               | TPQx-6F          | 16.43 | 15.63 | 14.10 | 14.68 | 16.46 | 15.72 | 14.73 | 15.50 |
| PBT-Cl            | BO-4Cl           | 15.52 | 15.36 | 15.29 | 16.17 | 14.00 | 16.67 | 15.14 | 15.50 |
| HFQx-T            | Y19              | 16.31 | 15.33 | 14.43 | 14.98 | 15.28 | 16.69 | 13.98 | 15.50 |

|              |                  |       |       |       |       |       |       |       |       |
|--------------|------------------|-------|-------|-------|-------|-------|-------|-------|-------|
| PBDT-3TCO    | BTP-2F-2Cl,SY2   | 16.50 | 15.95 | 14.21 | 13.62 | 17.64 | 15.09 | 16.41 | 15.50 |
| SZ5          | BDTP-4F          | 16.58 | 14.82 | 14.71 | 14.66 | 17.06 | 15.17 | 15.47 | 15.50 |
| SM1-S        | S-WSeSe-Cl       | 17.10 | 15.53 | 14.43 | 14.14 | 15.33 | 16.48 | 14.02 | 15.50 |
| P-FT         | BTP-S1           | 15.85 | 14.85 | 15.28 | 15.47 | 15.93 | 15.63 | 14.67 | 15.50 |
| BSCI-C2      | LL4              | 17.26 | 14.52 | 15.78 | 14.89 | 15.84 | 14.71 | 23.17 | 15.50 |
| BSFTR        | A-WSeSe-Cl       | 17.44 | 15.46 | 14.75 | 14.06 | 15.62 | 15.68 | 13.50 | 15.50 |
| BO2FC8       | BTP-2Cl-delta,H2 | 15.78 | 14.75 | 15.29 | 14.69 | 16.36 | 16.13 | 14.84 | 15.50 |
| PDBT-F       | BTIC-CF3-y       | 17.00 | 15.94 | 14.33 | 14.17 | 16.20 | 15.35 | 15.51 | 15.50 |
| PTQ10,PTQ-10 | S-WSeSe-Cl       | 16.51 | 16.88 | 14.78 | 13.13 | 15.45 | 16.24 | 14.32 | 15.50 |
| PBDT-S-2TC   | Y19              | 17.24 | 15.70 | 14.62 | 14.54 | 14.91 | 15.98 | 12.48 | 15.50 |
| P_chen,P105  | S-WSeSe-Cl       | 16.26 | 16.00 | 15.03 | 15.14 | 15.34 | 15.22 | 14.71 | 15.50 |
| P5T-2F       | BTP-S9           | 14.75 | 17.30 | 14.63 | 16.49 | 13.86 | 15.96 | 15.79 | 15.50 |
| PFOPB        | BTSe-4F          | 16.48 | 15.99 | 13.65 | 14.90 | 16.42 | 15.52 | 15.10 | 15.50 |
| PFBDB-T      | Y18              | 15.98 | 15.97 | 14.15 | 14.20 | 16.08 | 16.59 | 15.13 | 15.50 |
| P2F-EHp      | BTP-ClBr2        | 16.13 | 15.39 | 14.88 | 15.68 | 16.17 | 14.71 | 13.78 | 15.49 |
| BO2FC8       | BDTP-4F          | 16.19 | 15.42 | 14.85 | 14.49 | 16.52 | 15.49 | 13.91 | 15.49 |
| PTO2         | BTN-4F           | 16.87 | 14.76 | 14.32 | 13.99 | 17.92 | 15.10 | 15.58 | 15.49 |
| PBZ-ClSi     | PT2IC-4Cl        | 15.70 | 13.55 | 16.35 | 16.52 | 15.57 | 15.27 | 14.05 | 15.49 |
| P-FT         | BTP-2F-2Cl,SY2   | 15.39 | 15.39 | 15.14 | 14.89 | 16.15 | 15.98 | 14.12 | 15.49 |
| PBT-SF       | BDTP-4F          | 15.43 | 15.60 | 14.21 | 14.86 | 17.70 | 15.15 | 13.68 | 15.49 |
| PB3T         | LL4              | 17.23 | 16.16 | 15.82 | 15.28 | 14.22 | 14.24 | 22.01 | 15.49 |
| P-FT         | PT2IC-4Cl        | 15.56 | 14.27 | 15.40 | 15.60 | 15.95 | 16.16 | 14.22 | 15.49 |
| BO2FC8       | eC9-2Cl          | 15.89 | 14.51 | 15.22 | 14.85 | 16.38 | 16.09 | 14.94 | 15.49 |
| PBT-Cl       | LL3-2Cl          | 15.88 | 15.53 | 15.23 | 15.73 | 13.91 | 16.67 | 14.98 | 15.49 |
| J61          | HDO-4Cl          | 15.87 | 15.61 | 15.33 | 15.09 | 16.27 | 14.77 | 13.41 | 15.49 |
| P-CIT        | S-WSeSe-Cl       | 15.67 | 14.33 | 15.56 | 15.44 | 15.95 | 15.99 | 15.46 | 15.49 |
| PBN-S        | BTIC-F-m         | 16.94 | 15.91 | 13.43 | 14.57 | 15.95 | 16.14 | 15.42 | 15.49 |
| PBZ-ClSi     | TB-4Cl           | 15.55 | 14.31 | 15.93 | 16.12 | 15.63 | 15.41 | 14.34 | 15.49 |
| PBDT-3TCO    | Y9-2Br           | 16.21 | 15.20 | 14.76 | 14.21 | 16.69 | 15.86 | 16.08 | 15.49 |
| Qx-12F       | BTP-S2           | 16.36 | 14.20 | 14.58 | 16.80 | 16.60 | 14.39 | 15.16 | 15.49 |
| PBCT-2F      | Y6-O             | 17.44 | 16.33 | 12.93 | 14.23 | 15.02 | 16.96 | 17.85 | 15.49 |
| BO2FC8       | Y26              | 16.39 | 15.72 | 14.69 | 13.79 | 16.52 | 15.81 | 13.89 | 15.49 |
| 2T-TTC-BDFTT | AQx-2            | 16.52 | 15.33 | 13.60 | 14.06 | 16.69 | 16.70 | 14.22 | 15.48 |
| PBDTS-Se-TAZ | BTP-eC9          | 15.51 | 15.80 | 14.77 | 16.16 | 15.61 | 15.06 | 12.13 | 15.48 |
| PBDTS-Se-TAZ | BTP-4Cl,eC9      | 15.51 | 15.80 | 14.77 | 16.16 | 15.61 | 15.06 | 12.13 | 15.48 |
| PBDT-S-2TC   | BO-4Cl           | 17.35 | 15.57 | 14.96 | 14.10 | 14.89 | 16.03 | 12.36 | 15.48 |
| TPD-3F       | BTP-2Cl-delta,H2 | 16.25 | 14.99 | 15.03 | 14.08 | 16.58 | 15.96 | 14.56 | 15.48 |
| PFBDB-T      | L8-BO            | 15.52 | 16.11 | 14.29 | 14.34 | 16.07 | 16.55 | 15.19 | 15.48 |
| J62          | BT-BO-L4F,BTP-S7 | 15.35 | 16.73 | 14.68 | 14.87 | 15.76 | 15.47 | 10.49 | 15.48 |
| TTFQx-T1     | BTIC-2Br-m,TPT10 | 15.66 | 15.42 | 14.81 | 14.79 | 16.10 | 16.11 | 15.06 | 15.48 |
| PBFTT        | BTIC-2Cl-yCF3    | 16.43 | 16.01 | 14.29 | 14.81 | 15.93 | 15.41 | 15.32 | 15.48 |
| J101         | BTIC-2Br-m,TPT10 | 15.23 | 14.36 | 16.25 | 15.64 | 15.43 | 15.96 | 14.15 | 15.48 |
| D18          | BTIC-CF3-y       | 16.09 | 16.32 | 13.98 | 14.26 | 16.36 | 15.86 | 16.58 | 15.48 |
| PBDT-3TCO    | BTIC-2Br-        | 16.07 | 15.45 | 14.69 | 14.04 | 16.90 | 15.71 | 16.38 | 15.48 |

|                   |                  | m,TPT10 |       |       |       |       |       |       |       |
|-------------------|------------------|---------|-------|-------|-------|-------|-------|-------|-------|
| TPD-3F            | eC9-2Cl          | 16.36   | 14.74 | 14.96 | 14.22 | 16.63 | 15.94 | 14.68 | 15.48 |
| PDBT-2F           | L8-BO            | 16.32   | 15.09 | 13.53 | 15.39 | 17.09 | 15.44 | 13.44 | 15.48 |
| PBBSe-Cl          | Y9-2Br           | 15.85   | 15.45 | 14.92 | 15.41 | 15.80 | 15.42 | 15.21 | 15.47 |
| PBFTT             | L8-BO            | 16.92   | 16.31 | 14.00 | 14.57 | 15.89 | 15.14 | 14.79 | 15.47 |
| J52-2F,J52-F,PFBZ | MS-4Cl           | 15.80   | 13.29 | 14.99 | 15.82 | 16.70 | 16.25 | 14.63 | 15.47 |
| SM1-F             | BO-4Cl           | 16.48   | 15.49 | 14.72 | 14.12 | 15.79 | 16.24 | 15.70 | 15.47 |
| H31               | LL3              | 18.18   | 14.37 | 14.41 | 15.48 | 16.14 | 14.24 | 23.35 | 15.47 |
| P5T-2F            | TB-4Cl           | 15.07   | 16.94 | 15.16 | 16.27 | 13.32 | 16.07 | 15.82 | 15.47 |
| PBDT-S-2TC        | BTP-S2           | 17.88   | 15.24 | 14.91 | 14.70 | 14.63 | 15.48 | 13.18 | 15.47 |
| 2T-TTC-BDTFT      | BDTP-4F          | 16.52   | 15.15 | 13.74 | 14.05 | 17.08 | 16.29 | 13.99 | 15.47 |
| PBDB-T-2Cl        | BP5T-4F          | 15.22   | 16.03 | 14.82 | 15.22 | 15.46 | 16.08 | 15.25 | 15.47 |
| SZ5               | eC9-2Cl          | 16.03   | 14.72 | 14.88 | 15.27 | 16.44 | 15.49 | 15.54 | 15.47 |
| BSFTR             | BTP-ClBr2        | 17.60   | 15.23 | 14.68 | 14.09 | 15.81 | 15.42 | 13.41 | 15.47 |
| PBDT-3TCO         | PTIC-4Cl         | 16.33   | 14.98 | 14.74 | 14.34 | 16.91 | 15.52 | 16.14 | 15.47 |
| PBCIT,PCE1 0-2Cl  | BO-4Cl           | 16.54   | 14.54 | 14.29 | 15.88 | 16.44 | 15.14 | 15.60 | 15.47 |
| PBBSe-Cl          | SY3              | 15.38   | 15.71 | 14.88 | 15.67 | 15.75 | 15.43 | 15.20 | 15.47 |
| QX2               | A-WSSe-Cl        | 15.38   | 15.14 | 14.40 | 16.36 | 15.43 | 16.10 | 13.20 | 15.47 |
| BSCl-C2           | BO-4Cl           | 17.25   | 14.45 | 14.85 | 14.95 | 15.91 | 15.41 | 13.48 | 15.47 |
| PBCIT,PCE1 0-2Cl  | LL4              | 16.50   | 14.30 | 15.40 | 15.92 | 16.21 | 14.49 | 28.48 | 15.47 |
| PBZ-ClSi          | MS-4Cl           | 16.33   | 12.49 | 16.23 | 16.28 | 16.13 | 15.34 | 14.19 | 15.47 |
| J61               | SY1              | 15.69   | 16.45 | 15.04 | 14.36 | 16.39 | 14.86 | 12.41 | 15.47 |
| BO2FC8            | BTTPC-Br         | 15.18   | 14.71 | 15.24 | 15.39 | 15.91 | 16.36 | 14.86 | 15.46 |
| TPD-3F            | TPQx-6F          | 16.94   | 17.29 | 13.16 | 13.75 | 16.15 | 15.50 | 12.92 | 15.46 |
| PBT1-EH           | AQx-2            | 16.99   | 16.00 | 13.80 | 14.80 | 15.00 | 16.20 | 12.44 | 15.46 |
| P-FT              | SY3              | 15.30   | 14.89 | 15.20 | 15.14 | 16.26 | 16.01 | 14.54 | 15.46 |
| PBB-F             | BTIC-2Cl-yCF3    | 16.21   | 17.09 | 12.47 | 14.27 | 16.27 | 16.47 | 16.99 | 15.46 |
| PBQ-4F            | BTP-2F-2Cl,SY2   | 16.09   | 15.25 | 14.51 | 14.05 | 15.85 | 17.03 | 14.29 | 15.46 |
| PBQ-4F            | BTP-S1           | 16.32   | 14.64 | 14.71 | 14.61 | 15.92 | 16.58 | 14.82 | 15.46 |
| PTBTz-2           | LL3              | 17.40   | 15.71 | 15.49 | 15.82 | 14.37 | 13.98 | 24.61 | 15.46 |
| PBFTT             | N3               | 16.96   | 16.00 | 13.91 | 14.74 | 16.26 | 14.89 | 14.76 | 15.46 |
| PBQx-TF           | BDTP-4F          | 16.59   | 16.74 | 12.19 | 15.86 | 17.60 | 13.78 | 16.44 | 15.46 |
| PBFTT             | BTPTT-4F,Y6      | 16.84   | 16.24 | 14.02 | 14.62 | 16.08 | 14.96 | 14.74 | 15.46 |
| PDBT-2F           | Y6-BO            | 16.41   | 14.56 | 13.29 | 15.80 | 17.36 | 15.32 | 13.59 | 15.46 |
| PDBT-2F           | Y12              | 16.41   | 14.56 | 13.29 | 15.80 | 17.36 | 15.32 | 13.59 | 15.46 |
| P5T-2F            | HDO-4Cl          | 14.83   | 16.34 | 15.32 | 16.43 | 13.84 | 15.99 | 15.96 | 15.46 |
| SM1-F             | BTP-S2           | 17.06   | 15.25 | 14.58 | 14.39 | 15.74 | 15.72 | 15.86 | 15.46 |
| SZ5               | BTP-2Cl-delta,H2 | 15.93   | 14.92 | 14.93 | 15.06 | 16.38 | 15.52 | 15.43 | 15.46 |
| PFBDB-T           | ABP4T-4F         | 15.44   | 16.00 | 14.37 | 14.40 | 16.08 | 16.44 | 15.17 | 15.46 |
| PDBT-2F           | BTIC-2Cl-yCF3    | 15.99   | 15.30 | 13.77 | 15.65 | 16.80 | 15.22 | 14.23 | 15.46 |
| PBT-SF            | eC9-2Cl          | 15.67   | 14.62 | 14.48 | 15.31 | 17.10 | 15.55 | 14.89 | 15.46 |
| PBT-SF            | BTP-2Cl-delta,H2 | 15.54   | 14.83 | 14.58 | 15.12 | 17.08 | 15.57 | 14.80 | 15.45 |
| 2T-TTC-BDTFT      | BTPTT-4F,Y6      | 16.19   | 15.23 | 13.61 | 13.84 | 17.03 | 16.82 | 14.12 | 15.45 |
| PBDT-3TCO         | HDO-4Cl          | 16.29   | 15.41 | 14.50 | 13.94 | 17.14 | 15.44 | 16.82 | 15.45 |

|                   |                  |       |       |       |       |       |       |       |       |
|-------------------|------------------|-------|-------|-------|-------|-------|-------|-------|-------|
| PBTA-PSF          | SY3              | 15.07 | 15.48 | 14.71 | 15.92 | 16.38 | 15.16 | 13.59 | 15.45 |
| J52-2F,J52-F,PFBZ | BTIC-2Br-m,TPT10 | 14.95 | 15.15 | 15.10 | 15.30 | 16.52 | 15.69 | 15.22 | 15.45 |
| J101              | LL3-2Cl          | 16.71 | 13.35 | 16.18 | 16.21 | 14.44 | 15.83 | 13.81 | 15.45 |
| BSFTR             | BTP-ClBr         | 17.59 | 15.35 | 14.89 | 14.14 | 15.67 | 15.07 | 13.35 | 15.45 |
| L1                | LL3              | 17.32 | 16.04 | 15.66 | 16.00 | 14.49 | 13.19 | 25.73 | 15.45 |
| PBQ-4F            | TB-4Cl           | 16.17 | 15.26 | 14.48 | 14.21 | 15.62 | 16.97 | 14.73 | 15.45 |
| J62               | Y6-2Se           | 14.32 | 17.10 | 14.52 | 15.36 | 15.43 | 15.98 | 12.20 | 15.45 |
| PbiTPD            | LL3              | 17.54 | 15.37 | 13.91 | 15.35 | 14.86 | 15.67 | 17.96 | 15.45 |
| PBBSec-Cl         | PT2IC-4Cl        | 15.66 | 15.23 | 14.99 | 16.15 | 15.56 | 15.11 | 15.00 | 15.45 |
| TPD-3F            | BTDT-4F          | 17.12 | 16.38 | 13.19 | 13.80 | 16.84 | 15.36 | 13.44 | 15.45 |
| PBQ-4F            | SY3              | 15.78 | 15.07 | 14.74 | 14.24 | 16.12 | 16.74 | 14.79 | 15.45 |
| PTO2              | TPQx-6F          | 17.07 | 15.37 | 14.01 | 14.46 | 16.29 | 15.49 | 14.94 | 15.45 |
| BSCI-C2           | BTP-eC9          | 17.21 | 14.42 | 14.80 | 14.92 | 15.94 | 15.40 | 13.38 | 15.45 |
| BSCI-C2           | BTP-4Cl,eC9      | 17.21 | 14.42 | 14.80 | 14.92 | 15.94 | 15.40 | 13.38 | 15.45 |
| PBZ-CISi          | PTIC-4Cl         | 15.75 | 13.49 | 16.27 | 16.39 | 15.41 | 15.36 | 13.98 | 15.45 |
| PBCT-2F           | BTN-4F           | 17.08 | 16.27 | 14.36 | 14.14 | 14.53 | 16.29 | 16.72 | 15.45 |
| J91               | LL4              | 15.99 | 14.68 | 15.18 | 16.06 | 16.01 | 14.74 | 23.70 | 15.45 |
| H11               | LL3              | 17.22 | 14.78 | 14.63 | 15.53 | 15.63 | 14.87 | 20.88 | 15.44 |
| J52-2F,J52-F,PFBZ | Y6-Se            | 15.54 | 15.54 | 14.22 | 15.41 | 15.88 | 16.07 | 15.63 | 15.44 |
| BSFTR             | LL4              | 17.29 | 14.80 | 15.34 | 14.47 | 15.64 | 15.11 | 21.05 | 15.44 |
| PBBSec-Cl         | TB-4Cl           | 15.51 | 16.12 | 14.56 | 15.68 | 15.57 | 15.22 | 15.32 | 15.44 |
| PBQx-TF           | BTCT-2Cl         | 16.01 | 15.73 | 14.48 | 16.31 | 16.13 | 14.00 | 15.93 | 15.44 |
| PFBDB-T           | AQx-2            | 16.01 | 15.64 | 14.21 | 14.29 | 16.12 | 16.38 | 14.68 | 15.44 |
| PBDT-S-2TC        | BTP-eC9          | 17.30 | 15.56 | 14.84 | 14.12 | 14.89 | 15.94 | 12.26 | 15.44 |
| PBDT-S-2TC        | BTP-4Cl,eC9      | 17.30 | 15.56 | 14.84 | 14.12 | 14.89 | 15.94 | 12.26 | 15.44 |
| PTQ11             | LL3-2Cl          | 16.80 | 15.56 | 14.88 | 15.21 | 16.20 | 14.00 | 12.31 | 15.44 |
| PBDB-TSCL         | eC9-2Cl          | 16.11 | 14.59 | 14.76 | 15.65 | 16.56 | 14.98 | 15.21 | 15.44 |
| PBDB-T-2Cl        | AQx-2            | 15.92 | 15.52 | 14.68 | 14.71 | 15.90 | 15.92 | 14.71 | 15.44 |
| BSFTR             | BTP-ClBr1        | 17.49 | 15.28 | 14.53 | 14.15 | 15.73 | 15.46 | 13.41 | 15.44 |
| PBDT-S-2TC        | Y9-2Br           | 16.72 | 15.61 | 14.93 | 14.17 | 15.13 | 16.09 | 13.66 | 15.44 |
| BSCI-C2           | LL3-2Cl          | 17.23 | 14.58 | 14.77 | 14.69 | 15.89 | 15.48 | 13.38 | 15.44 |
| PBDTS-TDZ         | SY1              | 16.16 | 16.35 | 14.06 | 15.00 | 14.30 | 16.76 | 15.24 | 15.44 |
| P-4FP,P-FP        | Y19              | 16.07 | 15.33 | 14.81 | 15.55 | 15.62 | 15.26 | 14.68 | 15.44 |
| PFOPB             | BTTPC-Br         | 15.51 | 14.36 | 15.16 | 15.93 | 15.82 | 15.86 | 15.06 | 15.44 |
| PBFTT             | BPS-4F           | 15.78 | 15.90 | 14.73 | 15.84 | 15.45 | 14.94 | 16.00 | 15.44 |
| 2T-TTC-BDTFT      | eC9-2Cl          | 15.97 | 14.67 | 14.86 | 14.54 | 16.61 | 15.96 | 15.05 | 15.44 |
| PBDTS-Se-TAZ      | BTIC-2Br-m,TPT10 | 15.05 | 15.91 | 14.61 | 15.63 | 15.97 | 15.44 | 13.13 | 15.44 |
| PBT1-EH           | Y6-BO            | 17.20 | 16.15 | 14.16 | 14.55 | 14.44 | 16.10 | 12.18 | 15.43 |
| PBT1-EH           | Y12              | 17.20 | 16.15 | 14.16 | 14.55 | 14.44 | 16.10 | 12.18 | 15.43 |
| PCl(4)BDB-T       | PT2IC-4Cl        | 15.53 | 15.39 | 15.33 | 15.65 | 14.39 | 16.31 | 15.07 | 15.43 |
| PBDB-T-2Cl        | Y12              | 15.28 | 15.84 | 14.89 | 15.02 | 15.61 | 15.98 | 15.42 | 15.43 |
| PBDB-T-2Cl        | Y6-BO            | 15.28 | 15.84 | 14.89 | 15.02 | 15.61 | 15.98 | 15.42 | 15.43 |
| PFOPB             | AQx-2            | 16.93 | 15.55 | 14.02 | 14.95 | 16.01 | 15.16 | 14.75 | 15.43 |
| PBDTSF-TZNT       | BTP-S9           | 15.37 | 14.19 | 13.88 | 16.08 | 16.63 | 16.45 | 14.05 | 15.43 |
| PBT-Cl            | BTP-4Cl,eC9      | 15.35 | 15.32 | 15.25 | 16.14 | 13.94 | 16.60 | 15.07 | 15.43 |
| PBT-Cl            | BTP-eC9          | 15.35 | 15.32 | 15.25 | 16.14 | 13.94 | 16.60 | 15.07 | 15.43 |

|                     |                      |       |       |       |       |       |       |       |       |
|---------------------|----------------------|-------|-------|-------|-------|-------|-------|-------|-------|
| PBCIT,PCE1<br>0-2Cl | BTP-eC9              | 16.47 | 14.58 | 14.25 | 15.83 | 16.36 | 15.11 | 15.52 | 15.43 |
| PBCIT,PCE1<br>0-2Cl | BTP-4Cl,eC9          | 16.47 | 14.58 | 14.25 | 15.83 | 16.36 | 15.11 | 15.52 | 15.43 |
| PBBSe-Cl            | BTIC-2Br-<br>m,TPT10 | 15.47 | 15.63 | 14.84 | 15.49 | 15.90 | 15.26 | 15.32 | 15.43 |
| 2T-TTC-<br>BDTFT    | Y26                  | 16.60 | 15.26 | 13.65 | 13.42 | 17.34 | 16.31 | 14.01 | 15.43 |
| PTzBI-oF            | LL4                  | 16.35 | 14.03 | 15.35 | 15.93 | 15.78 | 15.15 | 21.04 | 15.43 |
| PBQx-TF             | TPQ-Cl               | 15.98 | 18.38 | 11.87 | 16.11 | 14.76 | 15.48 | 15.98 | 15.43 |
| PBDB-TSCl           | BTP-2Cl-<br>delta,H2 | 16.01 | 14.77 | 14.82 | 15.47 | 16.49 | 15.01 | 15.09 | 15.43 |
| PBTA-PSF            | BTIC-2Br-<br>m,TPT10 | 14.90 | 15.65 | 14.58 | 15.77 | 16.40 | 15.25 | 14.06 | 15.43 |
| BSFTR               | BTIC-BO-<br>4Br      | 17.83 | 15.32 | 14.13 | 14.29 | 15.70 | 15.30 | 13.44 | 15.43 |
| 2T-TTC-<br>BDTFT    | BTP-2Cl-<br>delta,H2 | 15.87 | 14.89 | 14.85 | 14.40 | 16.57 | 15.99 | 14.97 | 15.43 |
| PBB-F               | eC9-2Cl              | 16.02 | 15.53 | 14.34 | 14.69 | 15.90 | 16.08 | 16.29 | 15.43 |
| PBQ-4F              | Y9-2Br               | 15.67 | 15.01 | 14.87 | 13.96 | 16.63 | 16.42 | 15.05 | 15.43 |
| PBB-F               | BTTPC-Br             | 15.31 | 15.56 | 14.27 | 15.36 | 15.60 | 16.46 | 16.23 | 15.43 |
| TPD-3F              | BTTPC-Br             | 15.60 | 15.01 | 15.06 | 14.84 | 15.86 | 16.18 | 14.40 | 15.43 |
| PDBT-2F             | ABP4T-4F             | 16.34 | 14.46 | 13.46 | 15.81 | 17.15 | 15.34 | 13.38 | 15.43 |
| J62                 | Y6-Se                | 16.01 | 16.58 | 14.34 | 15.16 | 14.76 | 15.70 | 14.04 | 15.42 |
| PBDTS-TDZ           | BTP-S1               | 16.26 | 16.07 | 14.53 | 16.46 | 12.88 | 16.33 | 15.77 | 15.42 |
| PBDB-TSCl           | BTN-4F               | 16.39 | 14.60 | 14.85 | 14.66 | 17.02 | 15.01 | 14.69 | 15.42 |
| PBN-S               | BTCT-2Cl             | 15.88 | 14.84 | 15.61 | 15.41 | 15.34 | 15.46 | 14.77 | 15.42 |
| SM1-F               | LL3-2Cl              | 16.52 | 15.64 | 14.48 | 13.83 | 15.78 | 16.28 | 15.52 | 15.42 |
| BSFTR               | BTP-S2               | 17.88 | 14.77 | 14.64 | 14.21 | 15.47 | 15.57 | 13.34 | 15.42 |
| PBB-F               | BTP-2Cl-<br>delta,H2 | 15.92 | 15.72 | 14.34 | 14.58 | 15.88 | 16.10 | 16.17 | 15.42 |
| PBTA-PSF            | MS-4Cl               | 16.02 | 13.63 | 15.00 | 16.34 | 16.87 | 14.68 | 13.64 | 15.42 |
| PBT-SF              | BTTPC-Br             | 14.48 | 14.80 | 14.70 | 15.90 | 16.45 | 16.18 | 14.87 | 15.42 |
| PBQ-4F              | MS-4Cl               | 15.86 | 13.44 | 14.73 | 14.61 | 16.92 | 16.96 | 14.58 | 15.42 |
| PBT1-EH             | Y18                  | 17.56 | 16.20 | 13.74 | 14.72 | 14.17 | 16.12 | 12.24 | 15.42 |
| PBT-Cl              | Y19                  | 15.77 | 15.49 | 15.18 | 15.62 | 13.84 | 16.61 | 14.92 | 15.42 |
| PBB-F               | Y6-2Se               | 15.30 | 17.60 | 11.97 | 14.81 | 16.32 | 16.49 | 16.85 | 15.42 |
| PBT1-EH             | L8-BO                | 17.12 | 16.44 | 13.87 | 14.73 | 14.17 | 16.16 | 11.97 | 15.42 |
| D18                 | BTIC-F-m             | 16.64 | 16.37 | 13.23 | 14.32 | 16.07 | 15.85 | 16.38 | 15.41 |
| PE4                 | BTIC-2Br-<br>m,TPT10 | 14.98 | 15.11 | 15.17 | 15.34 | 16.39 | 15.50 | 15.41 | 15.41 |
| PFOPB               | Y6-1O                | 16.60 | 15.53 | 14.09 | 14.90 | 16.65 | 14.71 | 15.33 | 15.41 |
| PDBT-Cl             | eC9-2Cl              | 16.04 | 14.57 | 14.74 | 15.41 | 16.46 | 15.25 | 15.20 | 15.41 |
| PE4                 | BP5T-4F              | 14.79 | 15.22 | 14.67 | 15.50 | 16.55 | 15.73 | 14.39 | 15.41 |
| PBFTT               | Y18                  | 16.64 | 16.25 | 14.05 | 14.33 | 16.05 | 15.15 | 14.59 | 15.41 |
| PBBSe-Cl            | PTIC-4Cl             | 15.77 | 15.15 | 14.89 | 15.99 | 15.53 | 15.14 | 14.89 | 15.41 |
| P2F-EHp             | BTP-ClBr1            | 16.12 | 15.26 | 14.68 | 15.81 | 16.19 | 14.40 | 13.75 | 15.41 |
| PBDB-T-SF           | BTTPC-Br             | 14.66 | 14.33 | 15.06 | 16.35 | 16.14 | 15.93 | 15.22 | 15.41 |
| PBDTS-Se-<br>TAZ    | SY3                  | 15.17 | 15.55 | 14.71 | 15.76 | 15.91 | 15.36 | 12.42 | 15.41 |
| PFBDB-T             | Y22                  | 16.04 | 15.74 | 14.22 | 13.93 | 16.18 | 16.34 | 15.07 | 15.41 |
| PBDB-T-2Cl          | eC9-2Cl              | 15.67 | 14.70 | 15.15 | 15.20 | 16.06 | 15.67 | 15.11 | 15.41 |
| PDBT-2F             | BPS-4F               | 15.19 | 15.33 | 14.23 | 16.62 | 16.75 | 14.32 | 14.66 | 15.41 |
| D18                 | BTCT-2Cl             | 15.92 | 15.18 | 15.65 | 15.29 | 15.65 | 14.74 | 15.79 | 15.41 |
| PTO2                | BTP-2Cl-<br>delta,H2 | 16.02 | 14.27 | 14.77 | 14.80 | 16.55 | 16.02 | 15.54 | 15.41 |

|                       |                      |       |       |       |       |       |       |       |       |
|-----------------------|----------------------|-------|-------|-------|-------|-------|-------|-------|-------|
| PFOPB                 | Y26                  | 17.16 | 15.20 | 14.07 | 14.37 | 16.77 | 14.84 | 15.09 | 15.40 |
| J52-2Cl               | PT2IC-4Cl            | 15.49 | 14.29 | 15.21 | 15.96 | 16.07 | 15.40 | 14.28 | 15.40 |
| PTO2                  | eC9-2Cl              | 16.13 | 13.96 | 14.75 | 15.00 | 16.61 | 15.97 | 15.66 | 15.40 |
| PTQ11                 | BO-4Cl               | 16.69 | 15.31 | 14.96 | 15.27 | 16.28 | 13.92 | 12.03 | 15.40 |
| SM1-F                 | BTP-4Cl,eC9          | 16.42 | 15.47 | 14.54 | 14.11 | 15.69 | 16.16 | 15.62 | 15.40 |
| SM1-F                 | BTP-eC9              | 16.42 | 15.47 | 14.54 | 14.11 | 15.69 | 16.16 | 15.62 | 15.40 |
| PBDE-DFDT             | S-WSeSe-Cl           | 16.67 | 16.27 | 14.57 | 13.01 | 16.21 | 15.66 | 15.38 | 15.40 |
| TTFQx-T1              | BTIC-2Cl-<br>yCF3    | 16.16 | 15.49 | 14.20 | 14.22 | 15.54 | 16.79 | 14.43 | 15.40 |
| J62                   | eC9-2Cl              | 15.28 | 14.65 | 15.10 | 15.06 | 16.55 | 15.75 | 12.96 | 15.40 |
| PBTA-PSF              | PT2IC-4Cl            | 15.34 | 14.85 | 14.77 | 16.45 | 16.33 | 14.65 | 13.23 | 15.40 |
| PDTB-EF-T             | BTIC-CF3-y           | 16.05 | 16.06 | 13.97 | 13.95 | 16.44 | 15.91 | 14.70 | 15.40 |
| W1                    | BTP-2Cl-<br>delta,H2 | 15.57 | 14.42 | 14.79 | 15.03 | 16.64 | 15.94 | 14.70 | 15.40 |
| PBQ-4F                | PTIC-4Cl             | 16.05 | 14.36 | 14.81 | 14.53 | 15.84 | 16.79 | 14.35 | 15.40 |
| J101                  | BO-4Cl               | 15.74 | 13.26 | 16.37 | 16.65 | 14.56 | 15.78 | 13.94 | 15.40 |
| W1                    | TPQx-6F              | 16.62 | 16.24 | 13.86 | 14.67 | 15.59 | 15.39 | 13.20 | 15.40 |
| PBDB-TSCl             | TPQx-6F              | 16.88 | 14.91 | 13.91 | 15.20 | 16.39 | 15.09 | 14.15 | 15.40 |
| PBDB-T-2Cl            | BTP-2Cl-<br>delta,H2 | 15.57 | 14.93 | 15.15 | 15.03 | 16.00 | 15.69 | 14.95 | 15.40 |
| PBFTT                 | AQx                  | 16.69 | 16.31 | 14.08 | 15.04 | 15.10 | 15.15 | 13.87 | 15.40 |
| PDBT-2F               | SY1                  | 16.05 | 15.28 | 13.72 | 15.46 | 17.05 | 14.81 | 14.14 | 15.40 |
| PDBT-Cl               | BTP-2Cl-<br>delta,H2 | 15.94 | 14.76 | 14.79 | 15.24 | 16.36 | 15.28 | 15.07 | 15.39 |
| J52-2F,J52-<br>F,PFBZ | Y9-2Br               | 14.94 | 15.03 | 15.17 | 15.11 | 16.25 | 15.86 | 15.05 | 15.39 |
| W1                    | eC9-2Cl              | 15.68 | 14.16 | 14.73 | 15.23 | 16.65 | 15.92 | 14.82 | 15.39 |
| J62                   | Y11                  | 16.20 | 16.80 | 14.45 | 14.75 | 14.82 | 15.33 | 11.12 | 15.39 |
| PBDB-T-2Cl            | Y18                  | 15.87 | 15.92 | 14.63 | 14.58 | 15.26 | 16.09 | 15.15 | 15.39 |
| P-FT                  | Y9-2Br               | 15.10 | 14.86 | 15.30 | 14.93 | 16.38 | 15.78 | 14.78 | 15.39 |
| PBQ-4F                | HDO-4Cl              | 15.98 | 14.58 | 14.46 | 14.34 | 15.90 | 17.10 | 14.85 | 15.39 |
| PBT1-EH               | BTIC-F-m             | 17.04 | 16.18 | 13.53 | 14.21 | 15.40 | 15.99 | 13.25 | 15.39 |
| PE4                   | Y6-2Se               | 13.48 | 16.03 | 14.88 | 15.70 | 16.65 | 15.61 | 14.86 | 15.39 |
| PFBDB-T               | N3                   | 15.55 | 15.77 | 14.32 | 14.27 | 16.05 | 16.37 | 15.13 | 15.39 |
| P2F-EHp               | LL4                  | 16.92 | 13.13 | 15.39 | 16.28 | 16.20 | 14.41 | 23.38 | 15.39 |
| Qx-12F                | S-WSeSe-Cl           | 16.30 | 14.65 | 13.74 | 16.78 | 16.56 | 14.29 | 16.19 | 15.39 |
| PDBT-2F               | MS-4Cl               | 15.72 | 13.75 | 13.78 | 16.40 | 17.18 | 15.49 | 14.27 | 15.39 |
| P-FT                  | PTIC-4Cl             | 15.64 | 14.08 | 15.29 | 15.45 | 15.79 | 16.08 | 14.12 | 15.39 |
| PE4                   | Y6-BO                | 14.78 | 15.35 | 14.34 | 15.30 | 16.95 | 15.60 | 14.52 | 15.39 |
| PE4                   | Y12                  | 14.78 | 15.35 | 14.34 | 15.30 | 16.95 | 15.60 | 14.52 | 15.39 |
| PBDTS-Se-<br>TAZ      | MS-4Cl               | 16.14 | 13.87 | 15.01 | 16.07 | 16.28 | 14.94 | 12.80 | 15.39 |
| PBDTS-NQx             | LL3                  | 17.81 | 16.38 | 15.68 | 15.16 | 11.94 | 15.35 | 20.47 | 15.39 |
| PBCT-2F               | BDTP-4F              | 17.04 | 15.84 | 14.60 | 14.70 | 14.32 | 15.82 | 16.74 | 15.39 |
| PDBT-2F               | N3                   | 16.34 | 14.47 | 13.44 | 15.59 | 17.21 | 15.26 | 13.34 | 15.38 |
| BO2FC8                | TPQx-6F              | 16.03 | 15.77 | 14.32 | 14.31 | 16.25 | 15.63 | 13.28 | 15.38 |
| PBDB-T-2Cl            | L8-BO                | 15.18 | 16.10 | 14.76 | 14.76 | 15.41 | 16.08 | 15.22 | 15.38 |
| PTQ11                 | Y19                  | 16.69 | 15.61 | 14.81 | 15.12 | 16.14 | 13.92 | 12.21 | 15.38 |
| PBT1-EH               | Y22                  | 17.59 | 16.17 | 13.81 | 14.40 | 14.20 | 16.12 | 12.24 | 15.38 |
| PCl(4)BDB-<br>T       | PTIC-4Cl             | 15.64 | 15.31 | 15.22 | 15.49 | 14.42 | 16.21 | 14.97 | 15.38 |
| PBT1-EH               | TPQx-6F              | 17.07 | 16.09 | 13.92 | 14.59 | 14.94 | 15.69 | 11.90 | 15.38 |
| PCl(4)BDB-<br>T       | BTP-S9               | 15.09 | 16.13 | 15.04 | 15.25 | 14.44 | 16.32 | 15.33 | 15.38 |

|                   |                     |       |       |       |       |       |       |       |       |
|-------------------|---------------------|-------|-------|-------|-------|-------|-------|-------|-------|
| PBFTT             | Y11                 | 16.45 | 16.19 | 13.65 | 14.58 | 16.17 | 15.23 | 14.91 | 15.38 |
| L810              | PT2IC-4Cl           | 15.46 | 14.30 | 15.21 | 15.90 | 16.03 | 15.37 | 14.27 | 15.38 |
| TTFQx-T1          | Y11                 | 16.54 | 14.62 | 14.44 | 14.18 | 15.41 | 17.06 | 13.63 | 15.38 |
| J62               | BPS-4F              | 14.39 | 16.85 | 14.41 | 15.35 | 15.46 | 15.80 | 11.68 | 15.38 |
| PBDTS-TDZ         | BTTPC-Br            | 14.95 | 15.41 | 14.97 | 16.00 | 14.22 | 16.71 | 15.18 | 15.38 |
| PTBB-m            | A-WSSe-Cl           | 15.43 | 16.87 | 14.72 | 15.44 | 13.30 | 16.50 | 12.76 | 15.38 |
| J62               | BTP-2Cl-delta,H2    | 15.13 | 14.85 | 15.15 | 14.91 | 16.46 | 15.76 | 12.89 | 15.38 |
| 2T-TTC-BDTFT      | Y6-1O               | 16.06 | 15.04 | 13.68 | 13.64 | 17.07 | 16.75 | 14.44 | 15.38 |
| PBT-Cl            | PT2IC-4Cl           | 15.45 | 14.89 | 15.39 | 15.95 | 14.15 | 16.42 | 14.55 | 15.38 |
| BTR-Cl            | LL3                 | 17.34 | 14.31 | 15.56 | 14.51 | 15.23 | 15.29 | 21.30 | 15.38 |
| PE4               | Y11                 | 15.23 | 15.63 | 14.25 | 14.90 | 16.43 | 15.80 | 14.44 | 15.37 |
| SZ5               | BTN-4F              | 15.92 | 15.10 | 14.46 | 14.13 | 16.96 | 15.66 | 15.41 | 15.37 |
| J91               | A-WSSe-Cl           | 14.47 | 15.37 | 14.40 | 16.74 | 15.98 | 15.26 | 13.42 | 15.37 |
| PDBT-2F           | Y18                 | 16.14 | 14.71 | 13.57 | 15.15 | 17.14 | 15.51 | 13.49 | 15.37 |
| PBT1-EH           | BP5T-4F             | 17.07 | 16.16 | 13.93 | 14.83 | 14.25 | 16.00 | 12.01 | 15.37 |
| P-FT              | MS-4Cl              | 15.80 | 13.06 | 15.13 | 15.45 | 16.67 | 16.13 | 14.27 | 15.37 |
| J52-2Cl           | SY3                 | 15.09 | 14.84 | 14.98 | 15.50 | 16.31 | 15.51 | 14.66 | 15.37 |
| PBBSe-Cl          | BTP-S9              | 15.23 | 16.00 | 14.47 | 15.80 | 15.92 | 14.80 | 15.23 | 15.37 |
| PDBT-2F           | BTPTT-4F,Y6         | 16.25 | 14.49 | 13.55 | 15.46 | 17.13 | 15.34 | 13.31 | 15.37 |
| BSCl-C2           | Y19                 | 17.11 | 14.56 | 14.69 | 14.63 | 15.76 | 15.46 | 13.29 | 15.37 |
| PTQ10,PTQ-10      | A-WSSe-Cl           | 16.21 | 16.70 | 14.77 | 12.89 | 15.45 | 16.19 | 13.35 | 15.37 |
| QX2               | BTP-ClBr1           | 15.28 | 15.15 | 14.14 | 16.43 | 15.30 | 15.91 | 12.90 | 15.37 |
| PTQ11             | BTP-eC9             | 16.58 | 15.36 | 14.91 | 15.27 | 16.25 | 13.84 | 11.93 | 15.37 |
| PTQ11             | BTP-4Cl,eC9         | 16.58 | 15.36 | 14.91 | 15.27 | 16.25 | 13.84 | 11.93 | 15.37 |
| PBQx-TF           | BTP-PhC6,p-BTP-C6Ph | 16.10 | 17.77 | 11.73 | 15.56 | 16.01 | 15.03 | 16.26 | 15.37 |
| PBDB-T-2Cl        | ABP4T-4F            | 15.10 | 15.95 | 14.82 | 14.97 | 15.44 | 15.93 | 15.20 | 15.37 |
| PBZ-ClSi          | BTP-S9              | 15.18 | 14.08 | 15.76 | 16.27 | 15.92 | 14.99 | 13.91 | 15.37 |
| J61               | eC9-2Cl             | 15.40 | 14.79 | 15.34 | 14.83 | 16.45 | 15.39 | 13.41 | 15.37 |
| P2F-EHp           | BTIC-BO-4Br         | 16.30 | 15.15 | 14.18 | 16.02 | 16.31 | 14.25 | 13.83 | 15.37 |
| P-CIT             | BTP-ClBr            | 15.37 | 14.44 | 15.48 | 15.45 | 16.03 | 15.42 | 14.59 | 15.36 |
| J52-Cl            | PT2IC-4Cl           | 15.42 | 14.17 | 15.08 | 15.90 | 15.93 | 15.66 | 14.08 | 15.36 |
| 2T-TTC-BDTFT      | BTP-6F              | 15.98 | 14.75 | 13.82 | 14.01 | 16.90 | 16.71 | 13.95 | 15.36 |
| SZ5               | BTTPC-Br            | 15.24 | 14.34 | 14.88 | 15.79 | 15.87 | 16.03 | 15.51 | 15.36 |
| PBB-Cl            | LL3                 | 17.71 | 16.22 | 15.57 | 16.16 | 11.93 | 14.57 | 28.59 | 15.36 |
| PBB-F             | BPS-4F              | 15.53 | 17.41 | 11.80 | 14.60 | 16.40 | 16.40 | 17.61 | 15.36 |
| PBQx-TF           | BTN-4F              | 16.11 | 17.94 | 11.67 | 15.44 | 17.39 | 13.60 | 16.42 | 15.36 |
| SM1-S             | BTP-ClBr            | 16.90 | 15.28 | 14.60 | 14.05 | 15.36 | 15.94 | 13.65 | 15.36 |
| PFBDB-T           | eC9-2Cl             | 15.62 | 14.53 | 15.07 | 14.77 | 16.34 | 15.81 | 15.06 | 15.36 |
| PBDTS-TDZ         | BTP-2Cl-delta,H2    | 15.85 | 15.58 | 14.94 | 15.21 | 14.22 | 16.32 | 15.29 | 15.36 |
| PDBT-2F           | Y11                 | 15.97 | 14.88 | 13.23 | 15.41 | 17.14 | 15.49 | 13.69 | 15.36 |
| QX2               | BTIC-BO-4Br         | 15.48 | 15.04 | 14.10 | 16.60 | 15.13 | 15.77 | 13.16 | 15.35 |
| PBCIT,PCE10-2Cl   | BTP-S1              | 16.80 | 13.65 | 15.44 | 15.44 | 15.98 | 14.80 | 15.41 | 15.35 |
| PFOPB             | BTDTTP-4F           | 16.98 | 15.09 | 14.15 | 15.13 | 16.31 | 14.46 | 14.88 | 15.35 |
| J52-2F,J52-F,PFBZ | Y11                 | 15.28 | 15.93 | 14.42 | 14.86 | 15.82 | 15.81 | 14.00 | 15.35 |



|                 |                  |       |       |       |       |       |       |       |       |
|-----------------|------------------|-------|-------|-------|-------|-------|-------|-------|-------|
| P-FT            | BTIC-2Br-m,TPT10 | 14.96 | 14.95 | 15.21 | 14.99 | 16.37 | 15.63 | 14.88 | 15.35 |
| PBDTS-TDZ       | eC9-2Cl          | 15.96 | 15.43 | 14.86 | 15.34 | 14.22 | 16.30 | 15.40 | 15.35 |
| SM1-S           | A-WSSe-Cl        | 16.83 | 15.23 | 14.39 | 14.01 | 15.37 | 16.28 | 13.09 | 15.35 |
| PDBT-2F         | BTP-2F-ThCl      | 16.08 | 15.11 | 13.78 | 15.48 | 16.77 | 14.89 | 13.75 | 15.35 |
| PTQ10,PTQ-10    | BTP-ClBr         | 16.12 | 16.54 | 14.97 | 13.14 | 15.59 | 15.75 | 13.93 | 15.35 |
| PBDB-TSCl       | BDTP-4F          | 16.31 | 14.49 | 14.64 | 15.19 | 17.04 | 14.44 | 14.80 | 15.35 |
| PFBDB-T         | BTPPT-4F,Y6      | 15.35 | 15.98 | 14.21 | 14.17 | 15.96 | 16.43 | 15.12 | 15.35 |
| PBCT-2F         | eC9-2Cl          | 16.07 | 15.02 | 15.05 | 15.27 | 14.39 | 16.30 | 16.53 | 15.35 |
| PBDTT1Cl        | LL4              | 16.22 | 15.85 | 15.31 | 15.73 | 14.58 | 14.40 | 23.54 | 15.35 |
| PBDTS-Se-TAZ    | PT2IC-4Cl        | 15.38 | 14.99 | 14.81 | 16.16 | 15.80 | 14.93 | 12.09 | 15.35 |
| PBQ-4F          | BTIC-2Br-m,TPT10 | 15.62 | 15.09 | 14.72 | 14.10 | 16.13 | 16.40 | 15.10 | 15.35 |
| P-FT            | HDO-4Cl          | 15.47 | 14.29 | 14.91 | 15.23 | 15.93 | 16.25 | 14.64 | 15.35 |
| L810            | SY3              | 15.06 | 14.85 | 14.97 | 15.45 | 16.25 | 15.48 | 14.65 | 15.35 |
| TTFQx-T1        | BTP-2F-ThCl      | 16.21 | 15.18 | 14.98 | 14.11 | 15.49 | 16.10 | 13.78 | 15.35 |
| J11             | PT2IC-4Cl        | 15.42 | 14.66 | 15.26 | 16.07 | 15.84 | 14.82 | 14.51 | 15.35 |
| PFBDB-T         | BTP-2Cl-delta,H2 | 15.52 | 14.79 | 15.06 | 14.61 | 16.27 | 15.83 | 14.90 | 15.35 |
| SZ5             | Y6-O             | 16.35 | 15.06 | 13.08 | 14.20 | 17.07 | 16.31 | 16.57 | 15.34 |
| PBCIT,PCE10-2Cl | LL3-2Cl          | 16.56 | 14.69 | 14.23 | 15.23 | 16.17 | 15.19 | 15.45 | 15.34 |
| PBQ-4F          | CH1007           | 15.65 | 15.66 | 13.80 | 14.44 | 15.52 | 17.00 | 14.79 | 15.34 |
| P-4FP,P-FP      | Y9-2Br           | 15.40 | 14.76 | 15.08 | 15.11 | 16.36 | 15.36 | 14.86 | 15.34 |
| PTQ10,PTQ-10    | BTP-ClBr2        | 16.17 | 16.50 | 14.77 | 12.98 | 15.67 | 15.97 | 13.06 | 15.34 |
| J61             | BTP-2Cl-delta,H2 | 15.25 | 15.01 | 15.41 | 14.70 | 16.32 | 15.37 | 13.35 | 15.34 |
| PCl(4)BDB-T     | SY3              | 15.25 | 15.76 | 15.17 | 15.18 | 14.59 | 16.11 | 15.28 | 15.34 |
| PE4             | BPS-4F           | 13.51 | 15.84 | 14.80 | 16.12 | 16.41 | 15.37 | 15.37 | 15.34 |
| PBTA-PSF        | PTIC-4Cl         | 15.43 | 14.64 | 14.69 | 16.33 | 16.20 | 14.76 | 13.14 | 15.34 |
| P-CIT           | A-WSSe-Cl        | 15.45 | 14.12 | 15.34 | 15.23 | 15.99 | 15.91 | 14.63 | 15.34 |
| HFQx-T          | BTP-S9           | 16.08 | 15.05 | 14.44 | 14.95 | 15.09 | 16.43 | 13.20 | 15.34 |
| PCl(4)BDB-T     | TB-4Cl           | 15.40 | 16.21 | 14.93 | 15.18 | 14.02 | 16.30 | 15.42 | 15.34 |
| PBCT-2F         | TPQx-6F          | 17.22 | 16.78 | 14.03 | 14.76 | 12.84 | 16.41 | 15.95 | 15.34 |
| PBCT-2F         | BTP-2Cl-delta,H2 | 15.96 | 15.21 | 15.12 | 15.10 | 14.30 | 16.34 | 16.41 | 15.34 |
| PBDTS-TDZ       | BTP-FCI-FCI      | 15.89 | 16.13 | 14.45 | 15.48 | 13.48 | 16.61 | 15.15 | 15.34 |
| PTO2            | BDTP-4F          | 16.85 | 14.08 | 14.61 | 14.43 | 17.28 | 14.78 | 15.45 | 15.34 |
| TPD-3F          | Y6-O             | 16.78 | 16.50 | 12.81 | 13.15 | 17.18 | 15.61 | 14.29 | 15.34 |
| PBQx-TF         | BTP-Se           | 15.80 | 16.76 | 12.29 | 15.24 | 16.40 | 15.53 | 10.45 | 15.34 |
| PBDT-3TCO       | SY1              | 16.48 | 15.62 | 13.95 | 13.15 | 17.44 | 15.38 | 16.09 | 15.34 |
| QX2             | BTP-ClBr         | 15.24 | 15.20 | 14.49 | 16.42 | 15.31 | 15.37 | 13.50 | 15.34 |
| J61             | BTIC-2Cl-yCF3    | 15.54 | 16.68 | 14.20 | 14.34 | 16.17 | 15.09 | 12.31 | 15.34 |
| PDTB-EF-T       | BTIC-F-m         | 16.14 | 16.24 | 13.08 | 14.43 | 15.87 | 16.27 | 14.92 | 15.34 |
| PDBT-2F         | AQx              | 16.15 | 14.63 | 13.61 | 15.89 | 16.26 | 15.47 | 12.85 | 15.34 |
| 2T-TTC-BDTFT    | TPQx-6F          | 16.36 | 15.38 | 13.68 | 13.94 | 16.50 | 16.16 | 13.43 | 15.33 |
| PTO2            | Y6-O             | 17.06 | 14.46 | 12.93 | 13.99 | 17.67 | 15.89 | 16.61 | 15.33 |
| BSFTR           | BO-4Cl           | 17.18 | 14.95 | 14.63 | 13.90 | 15.70 | 15.65 | 13.28 | 15.33 |

|                  |                      |       |       |       |       |       |       |       |       |
|------------------|----------------------|-------|-------|-------|-------|-------|-------|-------|-------|
| PBT1-EH          | BTSe-4F              | 16.64 | 16.20 | 13.43 | 14.42 | 14.95 | 16.35 | 12.13 | 15.33 |
| BO2FC8           | Y6-1O                | 15.66 | 15.27 | 14.68 | 14.13 | 16.44 | 15.82 | 14.27 | 15.33 |
| 2T-TTC-<br>BDTFT | BTTPC-Br             | 15.21 | 14.54 | 14.78 | 15.07 | 16.02 | 16.38 | 15.02 | 15.33 |
| QX2              | BTP-ClBr2            | 15.31 | 15.05 | 14.26 | 16.36 | 15.19 | 15.83 | 12.89 | 15.33 |
| PE4              | ABP4T-4F             | 14.65 | 15.24 | 14.52 | 15.28 | 16.74 | 15.56 | 14.31 | 15.33 |
| PBT-Cl           | Y9-2Br               | 15.64 | 15.46 | 15.24 | 15.11 | 14.49 | 16.04 | 15.05 | 15.33 |
| PBB-F            | BT-BO-<br>L4F,BTP-S7 | 16.08 | 16.95 | 12.14 | 14.24 | 16.48 | 16.10 | 16.66 | 15.33 |
| PBDT-S-2TC       | SY3                  | 16.80 | 15.45 | 14.84 | 13.70 | 15.17 | 16.00 | 12.58 | 15.33 |
| PBDTS-TDZ        | BTIC-2Cl-<br>yCF3    | 15.94 | 16.34 | 13.35 | 15.25 | 14.23 | 16.87 | 15.35 | 15.33 |
| PBDTSF-<br>TZNT  | BTP-2F-<br>2Cl,SY2   | 15.32 | 13.83 | 13.92 | 15.93 | 16.65 | 16.32 | 13.86 | 15.33 |
| HFQx-T           | PT2IC-4Cl            | 15.88 | 14.35 | 14.67 | 15.28 | 15.35 | 16.44 | 13.62 | 15.33 |
| W1               | BTTPC-Br             | 14.72 | 14.54 | 14.79 | 15.76 | 15.97 | 16.17 | 14.77 | 15.32 |
| PBTA-PSF         | TB-4Cl               | 15.15 | 15.78 | 14.30 | 16.16 | 15.74 | 14.81 | 13.24 | 15.32 |
| PE4              | BTP-2F-<br>ThCl      | 15.16 | 15.68 | 14.97 | 14.99 | 16.03 | 15.10 | 14.42 | 15.32 |
| PBFTT            | SY1                  | 16.32 | 15.51 | 14.28 | 14.66 | 16.00 | 15.17 | 14.99 | 15.32 |
| PE4              | L8-BO                | 14.64 | 15.82 | 14.55 | 14.92 | 16.31 | 15.70 | 14.34 | 15.32 |
| PFOPB            | TPQx-6F              | 16.88 | 15.77 | 14.06 | 14.86 | 15.68 | 14.69 | 14.21 | 15.32 |
| PBDS-TZ          | LL4                  | 17.45 | 13.34 | 14.60 | 15.57 | 15.18 | 15.78 | 25.03 | 15.32 |
| PTQ10,PTQ-<br>10 | BTP-ClBr1            | 16.17 | 16.65 | 14.59 | 13.12 | 15.48 | 15.91 | 13.06 | 15.32 |
| PBT1-EH          | ABP4T-4F             | 17.05 | 16.14 | 13.94 | 14.56 | 14.23 | 15.99 | 11.93 | 15.32 |
| PBQ-4F           | SY1                  | 16.02 | 15.29 | 14.50 | 13.54 | 15.94 | 16.61 | 14.28 | 15.32 |
| J62              | BTP-2F-<br>ThCl      | 15.18 | 16.51 | 15.23 | 14.78 | 15.38 | 14.82 | 11.40 | 15.32 |
| J101             | Y19                  | 16.48 | 13.27 | 16.04 | 16.10 | 14.28 | 15.73 | 13.75 | 15.32 |
| PBDT-S-2TC       | BTIC-2Br-<br>m,TPT10 | 16.61 | 15.66 | 14.86 | 13.75 | 15.09 | 15.93 | 13.43 | 15.32 |
| PDBT-F           | BTCT-2Cl             | 16.05 | 14.41 | 15.47 | 15.27 | 15.30 | 15.39 | 14.42 | 15.32 |
| PBDT-S-2TC       | TB-4Cl               | 17.22 | 15.58 | 14.43 | 13.95 | 14.85 | 15.86 | 12.11 | 15.31 |
| P-FT             | SY1                  | 15.23 | 15.30 | 15.08 | 14.36 | 16.16 | 15.77 | 14.03 | 15.31 |
| J61              | CH1007               | 15.57 | 17.12 | 14.03 | 15.07 | 14.87 | 15.22 | 12.52 | 15.31 |
| SM1-F            | Y19                  | 16.42 | 15.62 | 14.31 | 13.82 | 15.51 | 16.20 | 15.46 | 15.31 |
| J52-2Cl          | BTP-S9               | 14.68 | 15.26 | 14.95 | 15.65 | 16.20 | 15.15 | 14.33 | 15.31 |
| J11              | SY3                  | 14.90 | 15.27 | 15.02 | 15.44 | 16.02 | 15.20 | 14.83 | 15.31 |
| PFBDB-T          | BDTTP-4F             | 15.86 | 15.15 | 14.36 | 14.35 | 16.28 | 15.87 | 14.78 | 15.31 |
| HFQx-T           | Y9-2Br               | 15.65 | 14.80 | 14.58 | 14.60 | 16.17 | 16.05 | 14.51 | 15.31 |
| PBDB-T-2Cl       | Y22                  | 15.95 | 15.76 | 14.69 | 14.32 | 15.29 | 15.87 | 15.10 | 15.31 |
| PE4              | N3                   | 14.72 | 15.23 | 14.50 | 15.07 | 16.86 | 15.48 | 14.27 | 15.31 |
| P-CIT            | BTP-ClBr2            | 15.31 | 14.22 | 15.26 | 15.31 | 16.07 | 15.69 | 14.28 | 15.31 |
| J61              | BTP-FCI-FCI          | 15.55 | 16.79 | 15.25 | 14.62 | 15.69 | 13.95 | 11.75 | 15.31 |
| PBT-Cl           | SY3                  | 15.19 | 15.28 | 15.15 | 15.53 | 14.40 | 16.29 | 14.88 | 15.31 |
| J52-2Cl          | TB-4Cl               | 15.12 | 15.04 | 14.78 | 15.46 | 15.92 | 15.52 | 14.57 | 15.31 |
| PBT-Cl           | PTIC-4Cl             | 15.52 | 14.76 | 15.27 | 15.80 | 14.13 | 16.35 | 14.46 | 15.31 |
| PBB-F            | Y11                  | 16.62 | 16.95 | 12.27 | 14.22 | 15.78 | 16.00 | 16.64 | 15.31 |
| PBDB-T-SF        | BTIC-CF3-y           | 15.92 | 15.80 | 14.40 | 14.42 | 16.26 | 15.02 | 15.31 | 15.30 |
| J101             | BTP-4Cl,eC9          | 15.55 | 13.20 | 16.23 | 16.62 | 14.52 | 15.70 | 13.87 | 15.30 |
| J101             | BTP-eC9              | 15.55 | 13.20 | 16.23 | 16.62 | 14.52 | 15.70 | 13.87 | 15.30 |
| TTFQx-T1         | BT-BO-<br>L4F,BTP-S7 | 16.08 | 14.91 | 14.51 | 14.22 | 15.35 | 16.75 | 13.26 | 15.30 |

|                   |                     |       |       |       |       |       |       |       |       |
|-------------------|---------------------|-------|-------|-------|-------|-------|-------|-------|-------|
| W1                | BDTP-4F             | 16.24 | 15.54 | 14.49 | 14.68 | 16.18 | 14.68 | 13.50 | 15.30 |
| PDBT-2F           | BTP-6F              | 16.24 | 14.00 | 13.13 | 16.03 | 17.14 | 15.26 | 13.16 | 15.30 |
| PDBT-Cl           | BTTPC-Br            | 15.21 | 14.19 | 14.77 | 16.00 | 15.80 | 15.82 | 15.18 | 15.30 |
| PBDB-TSCl         | BTTPC-Br            | 14.99 | 14.22 | 14.82 | 16.27 | 15.91 | 15.57 | 15.16 | 15.30 |
| PTBB-m            | BTP-ClBr2           | 15.34 | 16.57 | 14.75 | 15.47 | 13.38 | 16.26 | 12.48 | 15.30 |
| P_chen,P105       | BTP-ClBr            | 15.85 | 15.48 | 15.19 | 15.17 | 15.36 | 14.71 | 14.10 | 15.29 |
| P-CIT             | BTIC-BO-4Br         | 15.47 | 14.11 | 14.98 | 15.76 | 16.03 | 15.43 | 14.35 | 15.29 |
| PBDTS-Se-TAZ      | PTIC-4Cl            | 15.47 | 14.80 | 14.74 | 16.04 | 15.72 | 14.99 | 12.08 | 15.29 |
| J62               | BTTPC-Br            | 14.27 | 14.88 | 15.16 | 15.57 | 15.93 | 15.96 | 12.64 | 15.29 |
| BSFTR             | BTP-eC9             | 17.13 | 14.97 | 14.51 | 13.88 | 15.66 | 15.62 | 13.18 | 15.29 |
| BSFTR             | BTP-4Cl,eC9         | 17.13 | 14.97 | 14.51 | 13.88 | 15.66 | 15.62 | 13.18 | 15.29 |
| PBN-S             | BTP-PhC6,p-BTP-C6Ph | 16.03 | 15.16 | 14.46 | 14.60 | 15.71 | 15.80 | 15.14 | 15.29 |
| J52-2F,J52-F,PFBZ | BTP-2F-ThCl         | 15.04 | 15.84 | 15.13 | 14.92 | 15.74 | 15.09 | 14.10 | 15.29 |
| J52-Cl            | SY3                 | 15.02 | 14.73 | 14.85 | 15.44 | 16.17 | 15.56 | 14.45 | 15.29 |
| PBBSe-Cl          | HDO-4Cl             | 15.32 | 15.38 | 14.58 | 15.79 | 15.67 | 15.01 | 15.52 | 15.29 |
| SM1-S             | BTP-ClBr2           | 16.91 | 15.09 | 14.32 | 14.01 | 15.39 | 16.03 | 12.74 | 15.29 |
| W1                | BTN-4F              | 16.15 | 15.88 | 14.27 | 14.22 | 16.40 | 14.81 | 13.90 | 15.29 |
| J52-2Cl           | PTIC-4Cl            | 15.45 | 14.10 | 15.10 | 15.80 | 15.93 | 15.36 | 14.19 | 15.29 |
| J52-2Cl           | MS-4Cl              | 15.86 | 13.16 | 14.95 | 15.73 | 16.71 | 15.32 | 14.40 | 15.29 |
| PBT-Cl            | BTIC-2Br-m,TPT10    | 15.22 | 15.51 | 15.17 | 15.26 | 14.68 | 15.89 | 15.12 | 15.29 |
| PFBDB-T           | TPQx-6F             | 15.61 | 15.86 | 14.18 | 14.16 | 16.07 | 15.84 | 14.15 | 15.29 |
| P5T-2F            | BTP-S1              | 14.71 | 17.51 | 14.87 | 16.64 | 12.72 | 15.26 | 16.16 | 15.29 |
| PBDT-3TCO         | BTP-FCl-FCI         | 16.20 | 15.58 | 14.18 | 13.47 | 17.60 | 14.68 | 16.34 | 15.29 |
| PBT1-EH           | BTP-Se              | 15.79 | 15.36 | 13.70 | 14.78 | 15.73 | 16.36 | 11.75 | 15.29 |
| PDBT-F            | BTIC-F-m            | 16.81 | 15.62 | 13.44 | 14.36 | 15.80 | 15.68 | 15.02 | 15.29 |
| PE4               | Y18                 | 14.95 | 15.47 | 14.56 | 14.67 | 16.33 | 15.73 | 14.13 | 15.29 |
| J52-Cl            | BTP-S9              | 14.58 | 15.05 | 14.87 | 15.62 | 16.08 | 15.48 | 14.11 | 15.28 |
| BSFTR             | LL3-2Cl             | 17.15 | 15.14 | 14.46 | 13.65 | 15.63 | 15.67 | 13.12 | 15.28 |
| L810              | BTP-S9              | 14.64 | 15.26 | 14.94 | 15.59 | 16.15 | 15.11 | 14.31 | 15.28 |
| PBQ-4F            | BTP-FCl-FCI         | 15.82 | 14.94 | 14.52 | 13.94 | 15.66 | 16.80 | 14.07 | 15.28 |
| J101              | SY3                 | 15.22 | 13.32 | 16.19 | 16.07 | 14.95 | 15.94 | 13.79 | 15.28 |
| PBDB-T-2Cl        | N3                  | 15.26 | 15.66 | 14.78 | 14.82 | 15.31 | 15.85 | 15.16 | 15.28 |
| W1                | Y6-O                | 16.74 | 15.87 | 12.85 | 14.16 | 16.54 | 15.51 | 14.67 | 15.28 |
| PBDT-S-2TC        | PT2IC-4Cl           | 16.81 | 15.03 | 14.90 | 14.19 | 15.00 | 15.75 | 12.21 | 15.28 |
| 2T-TTC-BDTFT      | BTSe-4F             | 15.85 | 15.47 | 13.21 | 13.68 | 16.82 | 16.64 | 14.41 | 15.28 |

## Reference

- 1 T. N. Kipf and M. Welling, *arXiv*, 2017, preprint, arXiv:arXiv:1609.02907, <http://arxiv.org/abs/1609.02907>.
- 2 P. Veličković, G. Cucurull, A. Casanova, A. Romero, P. Liò and Y. Bengio, *arXiv*, 2018, preprint, arXiv:arXiv:1710.10903, <http://arxiv.org/abs/1710.10903>.
- 3 K. Kamiński, J. Ludwiczak, M. Jasiński, A. Bukala, R. Madaj, K. Szczepaniak and S. Dunin-Horkawicz, *Brief. Bioinform.*, 2022, **23**, bbab371.
- 4 K. Xu, W. Hu, J. Leskovec and S. Jegelka, *arXiv*, 2019, preprint, arXiv:arXiv:1810.00826, <http://arxiv.org/abs/1810.00826>.
- 5 W. Hu, B. Liu, J. Gomes, M. Zitnik, P. Liang, V. Pande and J. Leskovec, *arXiv*, 2020, preprint, arXiv:arXiv:1905.12265, DOI: 10.48550/arXiv.1905.12265.
- 6 J. Gilmer, S. S. Schoenholz, P. F. Riley, O. Vinyals and G. E. Dahl, *arXiv*, 2017, preprint, arXiv:arXiv:1704.01212, <http://arxiv.org/abs/1704.01212>.
- 7 Y. Zou, R. Wang, M. Du, X. Wang and D. Xu, *J. Phys. Chem. B*, 2023, **127**, 899–911.
- 8 H. Wang, J. Feng, Z. Dong, L. Jin, M. Li, J. Yuan and Y. Li, *Npj Comput. Mater.*, 2023, **9**, 200.
- 9 R. Suthar, A. T and S. Karak, *J. Mater. Chem. A*, 2023, **11**, 22248–22258.
